# Supplementary material for: Attraction or repulsion? Theoretical assessment of bulky alkyl groups by employing dispersion-corrected DFT
Source: Royal Society of Chemistry journal article supplement (doi:10.1039/c7ra11547d), 2018-01-01
Supplement: c7ra11547d1.pdf [file c7ra11547d1.pdf]

## Supporting Information

### **Attraction or Repulsion? Theoretical Assessment of Bulky Alkyl Groups by Employing Dispersion-Corrected DFT**

Mo Xie\* and Wei Lu\*

*Department of Chemistry, South University of Science and Technology of China,  
Shenzhen, Guangdong 518055 (China)*

## 1. Geometries of folded products

In the experimental research, the authors synthesized lots of compounds and arranged them into different series. Among them, the crystal structure data of the folded configurations of several compounds in 3 series were provided. In our computational studies, in order to better control the variables, the 1 series with only one arm were chosen for further study. Herein, we choose the crystal structure data of compound 3i to benchmark against the calculated 1i structure (named B2 in the text). The related chemical structures, parameter definitions, and the main bond length and bond angle which characterize the relative positions of the arm and body were shown in Figure S1, Figure S2 and Table S1, respectively. It is worth noting that in the same unit cell in the 3i crystal structure, there were two molecules with slightly different structures and we both listed the parameters of them in Table S2.

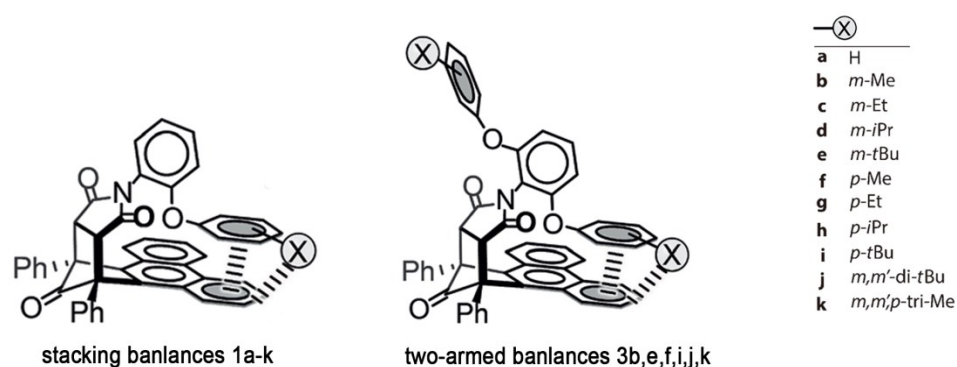

**Figure S1.** Chemical structures of folded configurations in the experimental study.

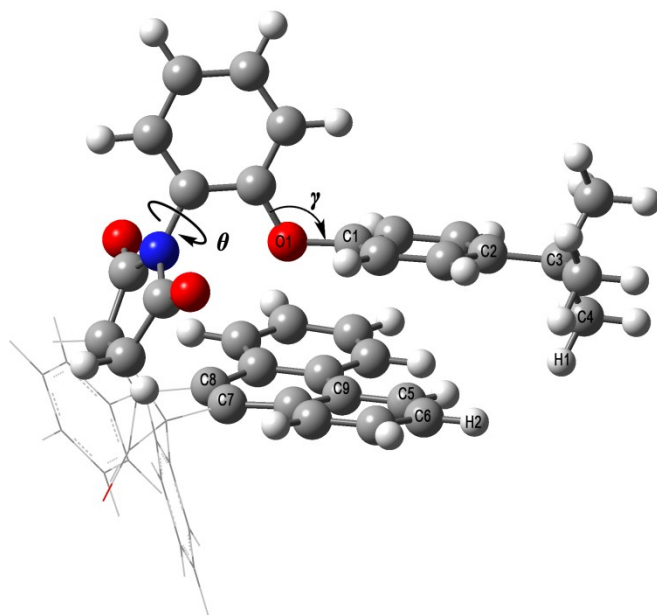

**Figure S2.** Geometries of B3LYP+D3 calculated B2 molecule and the structural parameter definition.

**Table S1.** Structural parameters of B2 (calculated by B3LYP and B3LYP+D3) and 3i (crystal structure). All distances are in Å and all angles are in deg.

| parameter | B3LYP  | B3LYP+D3 | Exp1   | Exp2   |
|-----------|--------|----------|--------|--------|
| O1-C7     | 4.036  | 3.593    | 3.702  | 3.782  |
| O1-C8     | 4.355  | 3.674    | 3.807  | 3.831  |
| C1-C9     | 4.253  | 3.266    | 3.456  | 3.324  |
| C2-C5     | 5.164  | 3.584    | 3.815  | 3.833  |
| C2-C6     | 4.658  | 3.680    | 4.038  | 3.741  |
| C3-C5     | 6.116  | 4.425    | 4.584  | 4.938  |
| C3-C6     | 5.442  | 4.335    | 4.584  | 4.625  |
| C4-C5     | 5.610  | 4.082    | 4.635  | 5.020  |
| C4-C6     | 4.846  | 4.143    | 3.721  | 4.310  |
| H1-H2     | 3.454  | 2.548    | 2.671  | 2.795  |
| $\theta$  | 118.64 | 118.21   | 115.02 | 115.87 |
| $\gamma$  | 64.00  | 73.70    | 80.79  | 75.03  |

## 2. NCI analysis of O-B2

**Figure S3.** Scatter diagram of reduced density gradient (RDG) of folded conformation O-B2.

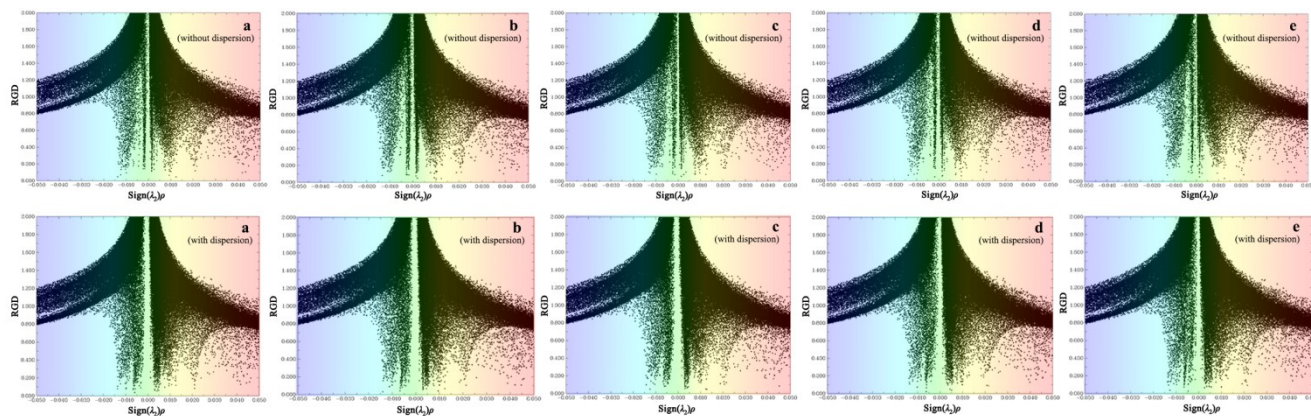

**Figure S4.** Colored contour surface of reduced density gradient (RDG) of folded conformation O-B2.

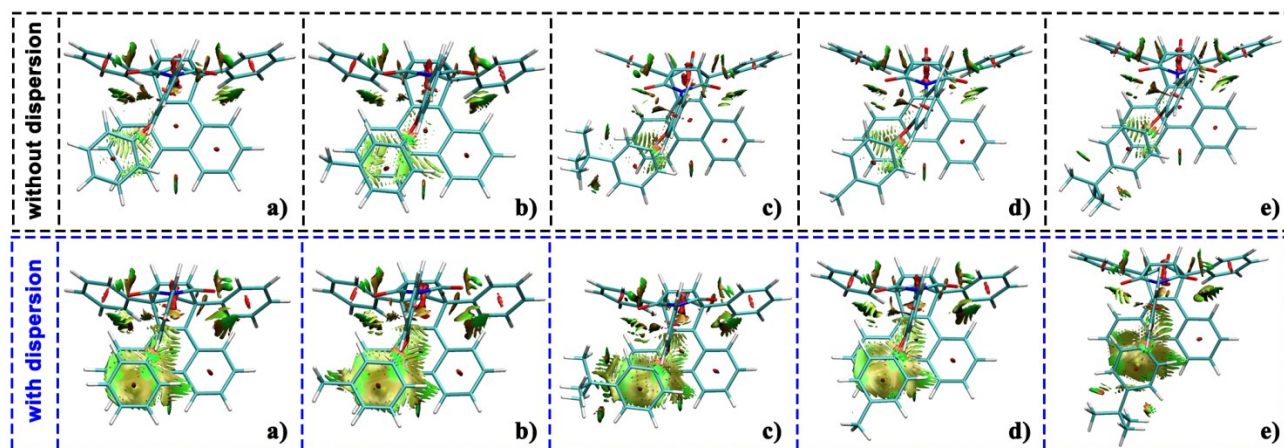

### 3. DFT optimized coordinates

O/RC

B3LYP/6-311+G(d,p), C1

---

| Atom | Cartesian (Hartree/Bohr) |          |          |
|------|--------------------------|----------|----------|
|      | X                        | Y        | Z        |
| C    | 0.4299                   | 0.62551  | -1.69974 |
| C    | -0.25052                 | -0.7159  | -1.32126 |
| C    | -1.29378                 | -0.35182 | -0.27233 |
| C    | -0.27107                 | 1.68257  | -0.85541 |
| N    | -1.23083                 | 1.03218  | -0.06597 |
| O    | -2.05858                 | -1.0973  | 0.28751  |
| O    | -0.06999                 | 2.87025  | -0.85419 |
| C    | 1.95975                  | 0.41035  | -1.40542 |
| C    | 0.91656                  | -1.65174 | -0.83437 |
| C    | 2.00922                  | -1.10024 | -1.80728 |
| O    | 2.68098                  | -1.66269 | -2.61286 |
| C    | 3.8399                   | 3.06539  | 1.78491  |
| C    | 3.23637                  | 2.30097  | 0.81036  |
| C    | 2.71783                  | 1.01656  | 1.10085  |
| C    | 2.78414                  | 0.52807  | 2.44176  |
| C    | 3.42534                  | 1.33533  | 3.40906  |
| C    | 3.94843                  | 2.57138  | 3.09293  |
| C    | 2.10703                  | 0.17602  | 0.10571  |
| C    | 2.16011                  | -0.74328 | 2.78945  |
| C    | 1.47002                  | -1.49967 | 1.79331  |
| C    | 1.50718                  | -1.02174 | 0.43665  |
| C    | 0.7778                   | -2.67229 | 2.17824  |
| H    | 0.21768                  | -3.22482 | 1.43974  |
| C    | 0.79777                  | -3.11919 | 3.48126  |
| C    | 1.51463                  | -2.40695 | 4.45335  |
| C    | 2.17181                  | -1.24418 | 4.11117  |
| H    | 4.22657                  | 4.04838  | 1.53723  |
| H    | 3.1502                   | 2.69425  | -0.19106 |
| H    | 3.50546                  | 0.99236  | 4.43232  |
| H    | 4.4314                   | 3.16522  | 3.86238  |
| H    | 0.257                    | -4.02029 | 3.75107  |
| H    | 1.54286                  | -2.76034 | 5.47915  |
| H    | 2.69928                  | -0.70697 | 4.88856  |
| C    | 0.69511                  | -3.14192 | -0.93236 |
| C    | 1.80158                  | -4.00155 | -0.88918 |
| C    | -0.57795                 | -3.70154 | -1.08647 |
| C    | 1.63915                  | -5.37827 | -0.9978  |
| H    | 2.79817                  | -3.59271 | -0.77147 |
| C    | -0.73955                 | -5.08218 | -1.19633 |
| H    | -1.4554                  | -3.06703 | -1.07028 |
| C    | 0.36667                  | -5.92523 | -1.1548  |
| H    | 2.50996                  | -6.02513 | -0.96326 |

|   |          |          |          |
|---|----------|----------|----------|
| H | -1.73695 | -5.49544 | -1.3081  |
| H | 0.24006  | -6.99976 | -1.2407  |
| C | 2.94066  | 1.28002  | -2.15402 |
| C | 4.28459  | 0.88754  | -2.22373 |
| C | 2.55532  | 2.4564   | -2.80602 |
| C | 5.21381  | 1.64803  | -2.92495 |
| H | 4.60757  | -0.02071 | -1.72856 |
| C | 3.48784  | 3.21773  | -3.50983 |
| H | 1.53575  | 2.81284  | -2.7266  |
| C | 4.81857  | 2.81635  | -3.57445 |
| H | 6.24885  | 1.32428  | -2.96738 |
| H | 3.16843  | 4.13071  | -4.00222 |
| H | 5.54347  | 3.40896  | -4.12336 |
| C | -2.10707 | 1.71857  | 0.82963  |
| C | -1.61476 | 2.28966  | 1.99891  |
| C | -3.46863 | 1.81065  | 0.51821  |
| C | -2.47823 | 2.93932  | 2.87469  |
| H | -0.5559  | 2.21169  | 2.21636  |
| C | -4.33611 | 2.45026  | 1.40267  |
| C | -3.83702 | 3.01047  | 2.57476  |
| H | -2.09248 | 3.3823   | 3.78587  |
| H | -5.39081 | 2.51501  | 1.16315  |
| H | -4.51817 | 3.51244  | 3.25407  |
| O | -3.86816 | 1.30851  | -0.6953  |
| C | -5.12843 | 0.73281  | -0.81327 |
| C | -5.98801 | 1.23902  | -1.78215 |
| C | -5.48388 | -0.36756 | -0.03566 |
| C | -7.22987 | 0.63496  | -1.97332 |
| H | -5.6737  | 2.0906   | -2.37521 |
| C | -6.73032 | -0.95601 | -0.23094 |
| H | -4.77809 | -0.76079 | 0.68676  |
| C | -7.60618 | -0.45817 | -1.196   |
| H | -7.01268 | -1.81608 | 0.3676   |
| H | -8.57405 | -0.92506 | -1.34519 |
| H | -0.75728 | -1.17725 | -2.17177 |
| H | 0.29434  | 0.87617  | -2.75409 |
| H | -7.90387 | 1.02477  | -2.72918 |

---

## O/RC

B3LYP+D3/6-311+G(d,p), C1

---

| Atom | Cartesian (Hartree/Bohr) |          |          |
|------|--------------------------|----------|----------|
|      | X                        | Y        | Z        |
| C    | -0.2382                  | 0.70219  | -1.46213 |
| C    | -0.17542                 | -0.84388 | -1.38503 |
| C    | -1.14243                 | -1.22814 | -0.27621 |
| C    | -1.2492                  | 1.11599  | -0.40919 |
| N    | -1.67811                 | -0.04392 | 0.24882  |
| O    | -1.4166                  | -2.3358  | 0.10679  |
| O    | -1.62613                 | 2.23154  | -0.1539  |
| C    | 1.22176                  | 1.18507  | -1.13763 |
| C    | 1.32385                  | -1.18058 | -1.0483  |
| C    | 1.97331                  | 0.00516  | -1.82493 |
| O    | 2.79925                  | 0.01067  | -2.68195 |
| C    | 1.33112                  | 3.69452  | 2.64641  |
| C    | 1.32228                  | 2.95834  | 1.48263  |
| C    | 1.53065                  | 1.55883  | 1.49845  |
| C    | 1.72557                  | 0.89721  | 2.74951  |
| C    | 1.73844                  | 1.68996  | 3.92044  |
| C    | 1.55035                  | 3.0554   | 3.87575  |
| C    | 1.49962                  | 0.75367  | 0.30937  |
| C    | 1.84553                  | -0.55499 | 2.79977  |
| C    | 1.72383                  | -1.32673 | 1.60358  |
| C    | 1.57257                  | -0.62149 | 0.36113  |
| C    | 1.73448                  | -2.73855 | 1.691    |
| H    | 1.60432                  | -3.32724 | 0.79734  |
| C    | 1.9015                   | -3.37742 | 2.89941  |
| C    | 2.06651                  | -2.6249  | 4.07133  |
| C    | 2.03276                  | -1.24775 | 4.01738  |
| H    | 1.16157                  | 4.76537  | 2.60851  |
| H    | 1.13687                  | 3.45669  | 0.54453  |
| H    | 1.88416                  | 1.22543  | 4.88686  |
| H    | 1.56126                  | 3.6311   | 4.79573  |
| H    | 1.9033                   | -4.46153 | 2.9402   |
| H    | 2.20997                  | -3.12368 | 5.02446  |
| H    | 2.15096                  | -0.69699 | 4.9413   |
| C    | 1.83286                  | -2.54197 | -1.43493 |
| C    | 3.21597                  | -2.75431 | -1.49484 |
| C    | 0.97563                  | -3.60766 | -1.72546 |
| C    | 3.72877                  | -4.0012  | -1.83458 |
| H    | 3.89347                  | -1.93874 | -1.27154 |
| C    | 1.49089                  | -4.85771 | -2.06512 |
| H    | -0.09554                 | -3.48455 | -1.62717 |
| C    | 2.86715                  | -5.05907 | -2.12228 |
| H    | 4.80339                  | -4.14719 | -1.87493 |
| H    | 0.81061                  | -5.67684 | -2.27527 |

|   |          |          |          |
|---|----------|----------|----------|
| H | 3.26701  | -6.03316 | -2.38527 |
| C | 1.6315   | 2.55124  | -1.61396 |
| C | 2.99331  | 2.87776  | -1.62356 |
| C | 0.70712  | 3.50872  | -2.04173 |
| C | 3.42054  | 4.13077  | -2.04787 |
| H | 3.72092  | 2.14506  | -1.29389 |
| C | 1.13648  | 4.76511  | -2.46712 |
| H | -0.35416 | 3.30171  | -1.98762 |
| C | 2.49224  | 5.0805   | -2.47307 |
| H | 4.47999  | 4.36592  | -2.04788 |
| H | 0.40435  | 5.50048  | -2.78523 |
| H | 2.82456  | 6.05956  | -2.80306 |
| C | -2.60008 | -0.01292 | 1.33524  |
| C | -2.20403 | 0.56401  | 2.53984  |
| C | -3.88751 | -0.5501  | 1.2014   |
| C | -3.07621 | 0.59507  | 3.62128  |
| H | -1.20326 | 0.97433  | 2.61528  |
| C | -4.75402 | -0.52707 | 2.2921   |
| C | -4.34883 | 0.03884  | 3.49613  |
| H | -2.75919 | 1.04133  | 4.55702  |
| H | -5.73956 | -0.96095 | 2.16986  |
| H | -5.0343  | 0.05088  | 4.33696  |
| O | -4.33173 | -1.17712 | 0.06166  |
| C | -4.11022 | -0.61952 | -1.18472 |
| C | -4.22397 | 0.7483   | -1.4221  |
| C | -3.7855  | -1.501   | -2.21393 |
| C | -3.97835 | 1.23659  | -2.7034  |
| H | -4.45392 | 1.423    | -0.60635 |
| C | -3.55411 | -1.00153 | -3.49276 |
| H | -3.69791 | -2.55635 | -1.98499 |
| C | -3.64103 | 0.36908  | -3.7416  |
| H | -3.29625 | -1.68557 | -4.29479 |
| H | -3.45272 | 0.75638  | -4.73714 |
| H | -0.47965 | -1.32275 | -2.31628 |
| H | -0.55923 | 1.06464  | -2.43921 |
| H | -4.04734 | 2.30403  | -2.88416 |

---

## O/TS

B3LYP/6-311+G(d,p), C1

| Atom | Cartesian (Hartree/Bohr) |          |          |
|------|--------------------------|----------|----------|
|      | X                        | Y        | Z        |
| C    | 1.25605                  | 0.56995  | -1.80234 |
| C    | 0.16257                  | -0.50347 | -1.71655 |
| C    | -1.02482                 | 0.19195  | -1.0773  |
| C    | 0.59862                  | 1.84882  | -1.3162  |
| N    | -0.74368                 | 1.58942  | -0.9006  |
| O    | -1.9926                  | -0.37951 | -0.65848 |
| O    | 1.15479                  | 2.91963  | -1.32367 |
| C    | 2.45856                  | 0.00859  | -0.95685 |
| C    | 0.77993                  | -1.67578 | -0.86559 |
| C    | 2.25469                  | -1.49309 | -1.348   |
| O    | 3.00432                  | -2.26387 | -1.85825 |
| C    | 3.66262                  | 2.35322  | 2.75359  |
| C    | 3.27766                  | 1.68989  | 1.60888  |
| C    | 2.38115                  | 0.59643  | 1.661    |
| C    | 1.83478                  | 0.20438  | 2.92074  |
| C    | 2.26634                  | 0.89962  | 4.0732   |
| C    | 3.16319                  | 1.94444  | 3.99853  |
| C    | 1.97695                  | -0.13868 | 0.49251  |
| C    | 0.82765                  | -0.84853 | 2.98569  |
| C    | 0.37179                  | -1.48088 | 1.78855  |
| C    | 1.01273                  | -1.12399 | 0.55088  |
| C    | -0.68404                 | -2.41913 | 1.86561  |
| H    | -1.06488                 | -2.86449 | 0.95978  |
| C    | -1.24422                 | -2.76669 | 3.07541  |
| C    | -0.76728                 | -2.18542 | 4.259    |
| C    | 0.23897                  | -1.24398 | 4.20827  |
| H    | 4.34912                  | 3.19085  | 2.68755  |
| H    | 3.66299                  | 2.01589  | 0.65443  |
| H    | 1.88137                  | 0.62468  | 5.04649  |
| H    | 3.46918                  | 2.45772  | 4.90454  |
| H    | -2.05499                 | -3.48697 | 3.10721  |
| H    | -1.19756                 | -2.46333 | 5.21591  |
| H    | 0.57025                  | -0.79829 | 5.13713  |
| C    | 0.22838                  | -3.06424 | -1.08121 |
| C    | 0.98003                  | -4.16876 | -0.65605 |
| C    | -0.99743                 | -3.29794 | -1.71335 |
| C    | 0.51953                  | -5.46516 | -0.8575  |
| H    | 1.93326                  | -4.01501 | -0.16435 |
| C    | -1.45785                 | -4.5982  | -1.91689 |
| H    | -1.62583                 | -2.46598 | -2.00494 |
| C    | -0.70146                 | -5.68626 | -1.4924  |
| H    | 1.11866                  | -6.30506 | -0.52054 |
| H    | -2.41592                 | -4.75521 | -2.40207 |

|   |          |          |          |
|---|----------|----------|----------|
| H | -1.06043 | -6.69821 | -1.65076 |
| C | 3.84179  | 0.5305   | -1.26262 |
| C | 4.95178  | -0.18333 | -0.78899 |
| C | 4.06705  | 1.67747  | -2.03083 |
| C | 6.24566  | 0.23783  | -1.07329 |
| H | 4.80357  | -1.07702 | -0.19379 |
| C | 5.36568  | 2.09841  | -2.31702 |
| H | 3.23193  | 2.27685  | -2.37058 |
| C | 6.45892  | 1.38102  | -1.84213 |
| H | 7.08955  | -0.3314  | -0.69685 |
| H | 5.51703  | 2.99537  | -2.90918 |
| H | 7.46895  | 1.70926  | -2.06587 |
| C | -1.72716 | 2.66445  | -0.84901 |
| C | -1.26313 | 3.95648  | -0.52276 |
| C | -3.12853 | 2.46867  | -0.76502 |
| C | -2.11884 | 5.00007  | -0.20031 |
| H | -0.20426 | 4.13919  | -0.50415 |
| C | -3.9776  | 3.52157  | -0.41405 |
| C | -3.48859 | 4.78248  | -0.11877 |
| H | -1.6971  | 5.97394  | 0.02328  |
| H | -5.04371 | 3.32746  | -0.41552 |
| H | -4.17015 | 5.58288  | 0.14894  |
| O | -3.70294 | 1.33679  | -1.29657 |
| C | -4.75361 | 0.70842  | -0.65819 |
| C | -5.73391 | 0.14922  | -1.47519 |
| C | -4.82142 | 0.57363  | 0.72734  |
| C | -6.79338 | -0.54646 | -0.89913 |
| H | -5.64973 | 0.26521  | -2.54999 |
| C | -5.89076 | -0.11703 | 1.29144  |
| H | -4.0389  | 0.98905  | 1.35054  |
| C | -6.87993 | -0.67866 | 0.48563  |
| H | -5.94138 | -0.22568 | 2.37017  |
| H | -7.70827 | -1.21786 | 0.93286  |
| H | -0.13755 | -0.87374 | -2.70011 |
| H | 1.5936   | 0.75003  | -2.82568 |
| H | -7.55614 | -0.9814  | -1.53712 |

## O/TS

B3LYP+D3/6-311+G(d,p), C1

---

| Atom | Cartesian (Hartree/Bohr) |          |          |
|------|--------------------------|----------|----------|
|      | X                        | Y        | Z        |
| C    | 0.43719                  | 0.85095  | -1.48829 |
| C    | -0.57543                 | -0.24159 | -1.11001 |
| C    | -1.3021                  | 0.31604  | 0.09057  |
| C    | 0.10129                  | 2.0335   | -0.59657 |
| N    | -1.05652                 | 1.73541  | 0.18282  |
| O    | -1.87241                 | -0.33448 | 0.91716  |
| O    | 0.72496                  | 3.06564  | -0.58569 |
| C    | 1.83999                  | 0.17961  | -1.30713 |
| C    | 0.26538                  | -1.52281 | -0.80165 |
| C    | 1.42673                  | -1.24837 | -1.80678 |
| O    | 1.87992                  | -1.92152 | -2.67683 |
| C    | 4.50028                  | 1.97716  | 1.9049   |
| C    | 3.667                    | 1.48127  | 0.92656  |
| C    | 2.83878                  | 0.36097  | 1.1711   |
| C    | 2.83337                  | -0.23584 | 2.46847  |
| C    | 3.71366                  | 0.29286  | 3.43971  |
| C    | 4.53404                  | 1.36767  | 3.16792  |
| C    | 1.97616                  | -0.2021  | 0.17161  |
| C    | 1.90401                  | -1.31841 | 2.77168  |
| C    | 0.9789                   | -1.77039 | 1.78108  |
| C    | 1.08019                  | -1.2083  | 0.46398  |
| C    | 0.00469                  | -2.73289 | 2.13371  |
| H    | -0.73174                 | -3.03273 | 1.40573  |
| C    | -0.03029                 | -3.28121 | 3.39659  |
| C    | 0.90943                  | -2.8818  | 4.35829  |
| C    | 1.84554                  | -1.91724 | 4.05064  |
| H    | 5.12471                  | 2.8396   | 1.69645  |
| H    | 3.63959                  | 1.96205  | -0.03927 |
| H    | 3.74577                  | -0.13639 | 4.43262  |
| H    | 5.194                    | 1.74995  | 3.94009  |
| H    | -0.78802                 | -4.01706 | 3.64477  |
| H    | 0.89226                  | -3.31808 | 5.35196  |
| H    | 2.54137                  | -1.61498 | 4.82244  |
| C    | -0.424                   | -2.84878 | -0.96598 |
| C    | 0.34887                  | -4.01237 | -1.06453 |
| C    | -1.81699                 | -2.96067 | -1.01463 |
| C    | -0.2564                  | -5.25655 | -1.20386 |
| H    | 1.42949                  | -3.94229 | -1.02852 |
| C    | -2.42228                 | -4.20758 | -1.15625 |
| H    | -2.44542                 | -2.08765 | -0.89471 |
| C    | -1.64621                 | -5.3595  | -1.25121 |
| H    | 0.35864                  | -6.14769 | -1.27701 |
| H    | -3.5054                  | -4.27257 | -1.18451 |

|   |          |          |          |
|---|----------|----------|----------|
| H | -2.11861 | -6.33068 | -1.35926 |
| C | 3.0128   | 0.76658  | -2.04371 |
| C | 4.18733  | 0.00837  | -2.1358  |
| C | 2.9796   | 2.02814  | -2.64356 |
| C | 5.30037  | 0.50029  | -2.80672 |
| H | 4.22842  | -0.97106 | -1.67329 |
| C | 4.09649  | 2.5212   | -3.31752 |
| H | 2.10426  | 2.65587  | -2.53993 |
| C | 5.25887  | 1.76069  | -3.40245 |
| H | 6.20171  | -0.10119 | -2.86579 |
| H | 4.05601  | 3.5075   | -3.76872 |
| H | 6.12809  | 2.14653  | -3.92541 |
| C | -2.02553 | 2.75071  | 0.53261  |
| C | -1.63702 | 4.10346  | 0.48582  |
| C | -3.29252 | 2.48386  | 1.11117  |
| C | -2.46078 | 5.12964  | 0.93095  |
| H | -0.65499 | 4.3532   | 0.12443  |
| C | -4.09846 | 3.52325  | 1.57053  |
| C | -3.69496 | 4.8476   | 1.50179  |
| H | -2.10561 | 6.15189  | 0.858    |
| H | -5.06693 | 3.24444  | 1.9694   |
| H | -4.33733 | 5.6381   | 1.87376  |
| O | -3.88304 | 1.23803  | 1.17278  |
| C | -4.3321  | 0.64054  | 0.0173   |
| C | -4.29387 | 1.23979  | -1.24135 |
| C | -4.81458 | -0.66184 | 0.1658   |
| C | -4.73502 | 0.51756  | -2.35377 |
| H | -3.93592 | 2.25526  | -1.35715 |
| C | -5.25439 | -1.36352 | -0.94772 |
| H | -4.80266 | -1.10527 | 1.15383  |
| C | -5.21108 | -0.782   | -2.21817 |
| H | -5.62324 | -2.37698 | -0.82592 |
| H | -5.54626 | -1.33735 | -3.08719 |
| H | -1.304   | -0.4269  | -1.90315 |
| H | 0.32533  | 1.19055  | -2.52139 |
| H | -4.70498 | 0.98689  | -3.33201 |

---



## O/PD

B3LYP/6-311+G(d,p), C1

| Atom | Cartesian (Hartree/Bohr) |          |          |
|------|--------------------------|----------|----------|
|      | X                        | Y        | Z        |
| C    | 1.80048                  | 0.58758  | -1.72114 |
| C    | 0.89105                  | -0.62718 | -2.04125 |
| C    | -0.51823                 | -0.05327 | -2.14356 |
| C    | 0.86096                  | 1.78391  | -1.64322 |
| N    | -0.43992                 | 1.32747  | -1.90928 |
| O    | -1.52936                 | -0.64517 | -2.42893 |
| O    | 1.15806                  | 2.93382  | -1.44062 |
| C    | 2.56559                  | 0.19817  | -0.40751 |
| C    | 1.17736                  | -1.6731  | -0.90059 |
| C    | 2.69473                  | -1.32868 | -0.72477 |
| O    | 3.65929                  | -2.02166 | -0.80313 |
| C    | 1.84572                  | 2.75846  | 3.28874  |
| C    | 2.03853                  | 2.03578  | 2.13158  |
| C    | 1.33712                  | 0.83029  | 1.89438  |
| C    | 0.38234                  | 0.3802   | 2.85582  |
| C    | 0.22339                  | 1.14164  | 4.03582  |
| C    | 0.93982                  | 2.29942  | 4.25566  |
| C    | 1.52839                  | 0.03397  | 0.71211  |
| C    | -0.4282                  | -0.80112 | 2.58472  |
| C    | -0.30496                 | -1.48415 | 1.33655  |
| C    | 0.73147                  | -1.05748 | 0.43477  |
| C    | -1.18864                 | -2.54994 | 1.04703  |
| H    | -1.13395                 | -3.03906 | 0.08658  |
| C    | -2.1221                  | -2.97512 | 1.96698  |
| C    | -2.20485                 | -2.34836 | 3.21802  |
| C    | -1.38105                 | -1.2821  | 3.51063  |
| H    | 2.3917                   | 3.6829   | 3.44532  |
| H    | 2.72782                  | 2.40447  | 1.38691  |
| H    | -0.48826                 | 0.82897  | 4.78894  |
| H    | 0.78815                  | 2.86154  | 5.17169  |
| H    | -2.79011                 | -3.79342 | 1.71984  |
| H    | -2.92786                 | -2.68875 | 3.95226  |
| H    | -1.48243                 | -0.80714 | 4.47788  |
| C    | 0.90516                  | -3.12434 | -1.21713 |
| C    | 1.51811                  | -4.12086 | -0.44478 |
| C    | 0.07299                  | -3.51599 | -2.27156 |
| C    | 1.30594                  | -5.46721 | -0.72043 |
| H    | 2.16659                  | -3.84367 | 0.3775   |
| C    | -0.13921                 | -4.86651 | -2.54671 |
| H    | -0.45429                 | -2.76899 | -2.85209 |
| C    | 0.47759                  | -5.84669 | -1.77535 |
| H    | 1.79211                  | -6.22202 | -0.11062 |
| H    | -0.7949                  | -5.14781 | -3.3647  |

|   |          |          |          |
|---|----------|----------|----------|
| H | 0.31335  | -6.89771 | -1.99093 |
| C | 3.88296  | 0.88476  | -0.13989 |
| C | 4.76922  | 0.32053  | 0.78793  |
| C | 4.26826  | 2.05502  | -0.80257 |
| C | 6.00301  | 0.90834  | 1.0438   |
| H | 4.49335  | -0.58592 | 1.31394  |
| C | 5.50619  | 2.64343  | -0.54594 |
| H | 3.58341  | 2.54362  | -1.48457 |
| C | 6.37888  | 2.07221  | 0.37499  |
| H | 6.67421  | 0.4534   | 1.76523  |
| H | 5.78129  | 3.55587  | -1.06543 |
| H | 7.34246  | 2.53043  | 0.57391  |
| C | -1.55811 | 2.20642  | -2.06018 |
| C | -1.55939 | 3.14958  | -3.08505 |
| C | -2.6459  | 2.12317  | -1.18201 |
| C | -2.64475 | 4.0001   | -3.25968 |
| H | -0.70274 | 3.20674  | -3.74662 |
| C | -3.74165 | 2.96839  | -1.36745 |
| C | -3.73609 | 3.90017  | -2.39988 |
| H | -2.63859 | 4.73038  | -4.0609  |
| H | -4.58746 | 2.89714  | -0.69479 |
| H | -4.59154 | 4.55547  | -2.52701 |
| O | -2.55546 | 1.22976  | -0.14942 |
| C | -3.73045 | 0.68473  | 0.36176  |
| C | -4.47847 | -0.20133 | -0.40938 |
| C | -4.10014 | 1.00061  | 1.66351  |
| C | -5.62617 | -0.7683  | 0.13756  |
| H | -4.14224 | -0.4461  | -1.41038 |
| C | -5.24916 | 0.42234  | 2.20182  |
| H | -3.48466 | 1.6833   | 2.23812  |
| C | -6.01629 | -0.45651 | 1.44035  |
| H | -5.54405 | 0.66325  | 3.21805  |
| H | -6.91112 | -0.90289 | 1.86154  |
| H | 1.13699  | -1.08124 | -3.00433 |
| H | 2.52651  | 0.7779   | -2.51576 |
| H | -6.21325 | -1.46271 | -0.45482 |

## O/PD

B3LYP+D3/6-311+G(d,p), C1

---

| Atom | Cartesian (Hartree/Bohr) |          |          |
|------|--------------------------|----------|----------|
|      | X                        | Y        | Z        |
| C    | -2.01538                 | -0.52416 | -1.68742 |
| C    | -1.33513                 | 0.84467  | -1.94631 |
| C    | 0.11725                  | 0.51009  | -2.26114 |
| C    | -0.94335                 | -1.56561 | -1.95959 |
| N    | 0.23468                  | -0.8856  | -2.29088 |
| O    | 1.01727                  | 1.28308  | -2.47148 |
| O    | -1.05857                 | -2.76428 | -1.91864 |
| C    | -2.50399                 | -0.45025 | -0.20113 |
| C    | -1.55157                 | 1.68004  | -0.63541 |
| C    | -2.92492                 | 1.05624  | -0.22321 |
| O    | -3.97068                 | 1.56918  | 0.01984  |
| C    | -0.49857                 | -3.37903 | 2.63426  |
| C    | -1.08774                 | -2.5271  | 1.72583  |
| C    | -0.67716                 | -1.17864 | 1.61758  |
| C    | 0.39215                  | -0.70331 | 2.43475  |
| C    | 0.95703                  | -1.6017  | 3.3676   |
| C    | 0.5225                   | -2.90713 | 3.47293  |
| C    | -1.27103                 | -0.25849 | 0.69109  |
| C    | 0.91297                  | 0.64451  | 2.24647  |
| C    | 0.40202                  | 1.46969  | 1.19936  |
| C    | -0.73668                 | 0.99104  | 0.46761  |
| C    | 1.0226                   | 2.71273  | 0.93624  |
| H    | 0.67653                  | 3.31574  | 0.11179  |
| C    | 2.06738                  | 3.16465  | 1.71159  |
| C    | 2.53185                  | 2.38662  | 2.78147  |
| C    | 1.97026                  | 1.15382  | 3.03249  |
| H    | -0.82314                 | -4.41248 | 2.69507  |
| H    | -1.86306                 | -2.90007 | 1.07381  |
| H    | 1.7686                   | -1.27779 | 4.00575  |
| H    | 0.98409                  | -3.57179 | 4.19642  |
| H    | 2.52949                  | 4.12097  | 1.48937  |
| H    | 3.35308                  | 2.73867  | 3.3966   |
| H    | 2.37656                  | 0.56234  | 3.84142  |
| C    | -1.54773                 | 3.17854  | -0.76498 |
| C    | -2.11797                 | 3.95075  | 0.25486  |
| C    | -0.97549                 | 3.83073  | -1.86172 |
| C    | -2.11661                 | 5.33901  | 0.17908  |
| H    | -2.56104                 | 3.46138  | 1.11351  |
| C    | -0.97504                 | 5.22274  | -1.93689 |
| H    | -0.47297                 | 3.25858  | -2.63177 |
| C    | -1.54639                 | 5.98159  | -0.91912 |
| H    | -2.56251                 | 5.92055  | 0.97955  |
| H    | -0.5172                  | 5.71175  | -2.79085 |

|   |          |          |          |
|---|----------|----------|----------|
| H | -1.54445 | 7.06534  | -0.97775 |
| C | -3.59369 | -1.39236 | 0.23209  |
| C | -4.255   | -1.13754 | 1.44019  |
| C | -3.97148 | -2.50966 | -0.51771 |
| C | -5.2673  | -1.97798 | 1.88791  |
| H | -3.97088 | -0.2761  | 2.03374  |
| C | -4.98726 | -3.35257 | -0.06793 |
| H | -3.43798 | -2.76315 | -1.42497 |
| C | -5.63911 | -3.09027 | 1.13334  |
| H | -5.7674  | -1.76423 | 2.82703  |
| H | -5.26005 | -4.2217  | -0.65801 |
| H | -6.42824 | -3.74844 | 1.48272  |
| C | 1.45813  | -1.55506 | -2.59062 |
| C | 1.60341  | -2.24465 | -3.78825 |
| C | 2.50808  | -1.50853 | -1.6667  |
| C | 2.8039   | -2.88012 | -4.08964 |
| H | 0.76849  | -2.27288 | -4.47919 |
| C | 3.71872  | -2.12973 | -1.97537 |
| C | 3.85771  | -2.81103 | -3.18174 |
| H | 2.91556  | -3.41752 | -5.02442 |
| H | 4.53952  | -2.08274 | -1.27138 |
| H | 4.8023   | -3.29462 | -3.40821 |
| O | 2.25586  | -0.86074 | -0.4893  |
| C | 3.33992  | -0.48448 | 0.29699  |
| C | 3.99015  | 0.71127  | 0.02066  |
| C | 3.71745  | -1.29202 | 1.36282  |
| C | 5.05194  | 1.10232  | 0.83216  |
| H | 3.64188  | 1.31828  | -0.80665 |
| C | 4.77875  | -0.88896 | 2.17052  |
| H | 3.16676  | -2.20491 | 1.55466  |
| C | 5.45002  | 0.30378  | 1.90367  |
| H | 5.08014  | -1.50893 | 3.00881  |
| H | 6.27603  | 0.61475  | 2.53487  |
| H | -1.77028 | 1.36903  | -2.79946 |
| H | -2.86851 | -0.70498 | -2.34439 |
| H | 5.56106  | 2.03935  | 0.63247  |

---

## A1/RC

B3LYP/6-311+G(d,p), C1

| Atom | Cartesian (Hartree/Bohr) |          |          |
|------|--------------------------|----------|----------|
|      | X                        | Y        | Z        |
| C    | 0.4618                   | 0.70329  | -1.61895 |
| C    | -0.12785                 | -0.68672 | -1.26382 |
| C    | -1.0908                  | -0.42851 | -0.11127 |
| C    | -0.21117                 | 1.68029  | -0.66263 |
| N    | -1.06803                 | 0.94405  | 0.16797  |
| O    | -1.77262                 | -1.23756 | 0.46693  |
| O    | -0.06536                 | 2.87515  | -0.61453 |
| C    | 2.01882                  | 0.54313  | -1.46281 |
| C    | 1.11435                  | -1.59391 | -0.93346 |
| C    | 2.09631                  | -0.93793 | -1.95789 |
| O    | 2.7191                   | -1.42168 | -2.84948 |
| C    | 4.03679                  | 3.10488  | 1.71907  |
| C    | 3.39274                  | 2.36574  | 0.75101  |
| C    | 2.95304                  | 1.04507  | 1.00698  |
| C    | 3.1428                   | 0.48992  | 2.3096   |
| C    | 3.82275                  | 1.27368  | 3.26975  |
| C    | 4.26704                  | 2.54768  | 2.98524  |
| C    | 2.30211                  | 0.23167  | 0.0146   |
| C    | 2.60149                  | -0.82539 | 2.63108  |
| C    | 1.87291                  | -1.56084 | 1.64688  |
| C    | 1.78301                  | -1.00952 | 0.32102  |
| C    | 1.26517                  | -2.78476 | 2.014    |
| H    | 0.67726                  | -3.324   | 1.28746  |
| C    | 1.40087                  | -3.29742 | 3.28551  |
| C    | 2.15344                  | -2.60181 | 4.24251  |
| C    | 2.73141                  | -1.39245 | 3.91936  |
| H    | 4.36139                  | 4.11647  | 1.49895  |
| H    | 3.21204                  | 2.80629  | -0.21753 |
| H    | 3.998                    | 0.88043  | 4.26261  |
| H    | 4.78316                  | 3.12149  | 3.74836  |
| H    | 0.92298                  | -4.23697 | 3.54246  |
| H    | 2.272                    | -3.00569 | 5.2429   |
| H    | 3.28887                  | -0.87086 | 4.68641  |
| C    | 0.94624                  | -3.08445 | -1.10374 |
| C    | 2.08585                  | -3.89323 | -1.21419 |
| C    | -0.31208                 | -3.69181 | -1.17907 |
| C    | 1.96984                  | -5.26717 | -1.3951  |
| H    | 3.07154                  | -3.44625 | -1.16175 |
| C    | -0.4271                  | -5.06937 | -1.36134 |
| H    | -1.20954                 | -3.10022 | -1.04622 |
| C    | 0.71146                  | -5.86169 | -1.47242 |
| H    | 2.86557                  | -5.87405 | -1.48029 |
| H    | -1.41303                 | -5.52063 | -1.41008 |

|   |          |          |          |
|---|----------|----------|----------|
| H | 0.62091  | -6.93379 | -1.61534 |
| C | 2.89621  | 1.49875  | -2.23486 |
| C | 4.24468  | 1.17341  | -2.43684 |
| C | 2.40947  | 2.69191  | -2.77983 |
| C | 5.08016  | 2.01522  | -3.1626  |
| H | 4.64453  | 0.25386  | -2.02577 |
| C | 3.24814  | 3.53503  | -3.50806 |
| H | 1.38649  | 2.99626  | -2.59599 |
| C | 4.58422  | 3.19989  | -3.70466 |
| H | 6.1205   | 1.74259  | -3.30852 |
| H | 2.85169  | 4.45967  | -3.91542 |
| H | 5.2358   | 3.85642  | -4.27249 |
| C | -1.90202 | 1.54288  | 1.16158  |
| C | -1.34902 | 2.07272  | 2.32296  |
| C | -3.28538 | 1.59078  | 0.9526   |
| C | -2.1719  | 2.63674  | 3.29234  |
| H | -0.27478 | 2.03116  | 2.4604   |
| C | -4.11103 | 2.14536  | 1.92978  |
| C | -3.5506  | 2.66421  | 3.09315  |
| H | -1.73893 | 3.04755  | 4.19737  |
| H | -5.182   | 2.17647  | 1.76884  |
| H | -4.19992 | 3.09944  | 3.84575  |
| O | -3.74963 | 1.13519  | -0.25538 |
| C | -4.99908 | 0.52705  | -0.32255 |
| C | -5.92233 | 1.04609  | -1.22005 |
| C | -5.27795 | -0.61287 | 0.42942  |
| C | -7.16856 | 0.42994  | -1.38706 |
| H | -5.65493 | 1.93048  | -1.78996 |
| C | -6.5182  | -1.22043 | 0.27098  |
| H | -4.52401 | -1.01635 | 1.09503  |
| C | -7.45481 | -0.70579 | -0.62634 |
| H | -6.7527  | -2.11258 | 0.84281  |
| H | -8.41563 | -1.19854 | -0.74034 |
| H | -0.68763 | -1.12341 | -2.09382 |
| H | 0.22911  | 1.00359  | -2.64296 |
| C | -8.17248 | 0.99847  | -2.36061 |
| H | -9.04976 | 0.35512  | -2.45224 |
| H | -8.51966 | 1.98721  | -2.04373 |
| H | -7.7396  | 1.11543  | -3.35847 |

## A1/RC

B3LYP+D3/6-311+G(d,p), C1

| Atom | Cartesian (Hartree/Bohr) |          |          |
|------|--------------------------|----------|----------|
|      | X                        | Y        | Z        |
| C    | -0.59213                 | 0.82612  | -1.13713 |
| C    | 0.00279                  | -0.55016 | -1.52358 |
| C    | -0.58195                 | -1.53351 | -0.52505 |
| C    | -1.45984                 | 0.56044  | 0.07748  |
| N    | -1.36046                 | -0.80167 | 0.38267  |
| O    | -0.41718                 | -2.72484 | -0.48305 |
| O    | -2.11866                 | 1.35902  | 0.69539  |
| C    | 0.64647                  | 1.73295  | -0.8121  |
| C    | 1.55815                  | -0.37285 | -1.38742 |
| C    | 1.62722                  | 1.11486  | -1.85549 |
| O    | 2.24076                  | 1.62305  | -2.73893 |
| C    | 0.57409                  | 3.17723  | 3.4922   |
| C    | 0.60777                  | 2.77728  | 2.17556  |
| C    | 1.2497                   | 1.57705  | 1.79274  |
| C    | 1.8452                   | 0.75353  | 2.79586  |
| C    | 1.79959                  | 1.20476  | 4.13384  |
| C    | 1.1841                   | 2.38888  | 4.4787   |
| C    | 1.29186                  | 1.11557  | 0.43557  |
| C    | 2.42322                  | -0.53469 | 2.43853  |
| C    | 2.37772                  | -0.99158 | 1.08642  |
| C    | 1.82156                  | -0.11091 | 0.10037  |
| C    | 2.84519                  | -2.2901  | 0.78036  |
| H    | 2.77367                  | -2.65542 | -0.23126 |
| C    | 3.37913                  | -3.1014  | 1.7558   |
| C    | 3.46577                  | -2.64222 | 3.07787  |
| C    | 2.99215                  | -1.39061 | 3.40677  |
| H    | 0.06976                  | 4.09835  | 3.76307  |
| H    | 0.12387                  | 3.38241  | 1.42613  |
| H    | 2.24489                  | 0.60972  | 4.9197   |
| H    | 1.16333                  | 2.70246  | 5.51713  |
| H    | 3.72721                  | -4.0958  | 1.49861  |
| H    | 3.89381                  | -3.27551 | 3.84775  |
| H    | 3.058                    | -1.07165 | 4.43825  |
| C    | 2.43678                  | -1.31561 | -2.1549  |
| C    | 3.79033                  | -0.99581 | -2.30951 |
| C    | 1.956                    | -2.50213 | -2.71258 |
| C    | 4.64389                  | -1.84418 | -3.00371 |
| H    | 4.17656                  | -0.08002 | -1.87807 |
| C    | 2.81262                  | -3.3524  | -3.409   |
| H    | 0.92728                  | -2.79771 | -2.55291 |
| C    | 4.15705                  | -3.02679 | -3.55826 |
| H    | 5.69083                  | -1.58176 | -3.11321 |
| H    | 2.4259                   | -4.27621 | -3.82627 |

|   |          |          |          |
|---|----------|----------|----------|
| H | 4.82332  | -3.69057 | -4.09913 |
| C | 0.4682   | 3.21836  | -0.91442 |
| C | 1.60563  | 4.03339  | -0.91912 |
| C | -0.79034 | 3.81745  | -0.99963 |
| C | 1.48674  | 5.41523  | -1.00182 |
| H | 2.5881   | 3.58134  | -0.85142 |
| C | -0.9093  | 5.2031   | -1.08252 |
| H | -1.68375 | 3.20971  | -0.94322 |
| C | 0.22693  | 6.00613  | -1.08441 |
| H | 2.37882  | 6.03256  | -1.00237 |
| H | -1.89513 | 5.65303  | -1.13659 |
| H | 0.13337  | 7.08523  | -1.14642 |
| C | -2.06334 | -1.3953  | 1.46919  |
| C | -1.68906 | -1.06412 | 2.76862  |
| C | -3.10552 | -2.30522 | 1.24678  |
| C | -2.3347  | -1.6435  | 3.85327  |
| H | -0.87898 | -0.35841 | 2.91022  |
| C | -3.74143 | -2.89249 | 2.33785  |
| C | -3.35537 | -2.56674 | 3.6328   |
| H | -2.03476 | -1.38372 | 4.86175  |
| H | -4.537   | -3.60178 | 2.14334  |
| H | -3.86072 | -3.03152 | 4.47235  |
| O | -3.51053 | -2.70835 | -0.00249 |
| C | -3.64396 | -1.78069 | -1.02027 |
| C | -4.18929 | -0.52244 | -0.80077 |
| C | -3.2057  | -2.16494 | -2.28484 |
| C | -4.25188 | 0.40825  | -1.84177 |
| H | -4.50595 | -0.24154 | 0.19709  |
| C | -3.29205 | -1.25022 | -3.32806 |
| H | -2.77915 | -3.1516  | -2.4155  |
| C | -3.79541 | 0.03214  | -3.10747 |
| H | -2.9474  | -1.53263 | -4.31731 |
| H | -3.83628 | 0.74418  | -3.92546 |
| H | -0.26278 | -0.85325 | -2.53599 |
| H | -1.19952 | 1.25835  | -1.93198 |
| C | -4.78171 | 1.79232  | -1.5711  |
| H | -4.61409 | 2.45838  | -2.41972 |
| H | -5.85752 | 1.77324  | -1.37171 |
| H | -4.29495 | 2.2243   | -0.69286 |

## A1/TS

B3LYP/6-311+G(d,p), C1

| Atom | Cartesian (Hartree/Bohr) |          |          |
|------|--------------------------|----------|----------|
|      | X                        | Y        | Z        |
| C    | 1.36193                  | 0.53731  | -1.81383 |
| C    | 0.24091                  | -0.49946 | -1.66083 |
| C    | -0.88934                 | 0.23938  | -0.96848 |
| C    | 0.77786                  | 1.83749  | -1.29182 |
| N    | -0.55345                 | 1.628    | -0.81725 |
| O    | -1.8534                  | -0.29589 | -0.49668 |
| O    | 1.37531                  | 2.88556  | -1.31757 |
| C    | 2.59328                  | -0.06108 | -1.0392  |
| C    | 0.86606                  | -1.68535 | -0.83436 |
| C    | 2.31535                  | -1.55724 | -1.40452 |
| O    | 3.00642                  | -2.35709 | -1.9515  |
| C    | 4.09385                  | 2.26588  | 2.57297  |
| C    | 3.61858                  | 1.60943  | 1.45866  |
| C    | 2.6919                   | 0.54622  | 1.57337  |
| C    | 2.20973                  | 0.18023  | 2.86667  |
| C    | 2.73327                  | 0.86682  | 3.98565  |
| C    | 3.65785                  | 1.88075  | 3.84893  |
| C    | 2.19395                  | -0.18192 | 0.43739  |
| C    | 1.17233                  | -0.83617 | 3.00003  |
| C    | 0.62217                  | -1.45742 | 1.83722  |
| C    | 1.20065                  | -1.13168 | 0.5608   |
| C    | -0.46231                 | -2.35374 | 1.9848   |
| H    | -0.91478                 | -2.78831 | 1.10704  |
| C    | -0.96085                 | -2.67355 | 3.22873  |
| C    | -0.39104                 | -2.1056  | 4.37716  |
| C    | 0.64511                  | -1.20357 | 4.25888  |
| H    | 4.8016                   | 3.0804   | 2.45922  |
| H    | 3.95458                  | 1.91783  | 0.48001  |
| H    | 2.39827                  | 0.61097  | 4.98233  |
| H    | 4.0348                   | 2.38882  | 4.73081  |
| H    | -1.79541                 | -3.36152 | 3.31467  |
| H    | -0.77255                 | -2.36238 | 5.3603   |
| H    | 1.04911                  | -0.76649 | 5.16271  |
| C    | 0.25548                  | -3.05563 | -1.00272 |
| C    | 0.9931                   | -4.18218 | -0.61249 |
| C    | -1.01486                 | -3.25083 | -1.55488 |
| C    | 0.47567                  | -5.4631  | -0.77017 |
| H    | 1.97981                  | -4.05791 | -0.18249 |
| C    | -1.53276                 | -4.53557 | -1.71384 |
| H    | -1.63031                 | -2.39905 | -1.81487 |
| C    | -0.78998                 | -5.64604 | -1.3248  |
| H    | 1.06472                  | -6.32086 | -0.46163 |
| H    | -2.52456                 | -4.66272 | -2.13593 |

|   |          |          |          |
|---|----------|----------|----------|
| H | -1.19365 | -6.64594 | -1.44845 |
| C | 3.97288  | 0.41117  | -1.43022 |
| C | 5.08376  | -0.33828 | -1.01767 |
| C | 4.1916   | 1.54601  | -2.218   |
| C | 6.37238  | 0.0369   | -1.37957 |
| H | 4.94006  | -1.2235  | -0.40888 |
| C | 5.48486  | 1.92137  | -2.58136 |
| H | 3.35882  | 2.17217  | -2.51222 |
| C | 6.57903  | 1.16895  | -2.16646 |
| H | 7.21703  | -0.55929 | -1.04938 |
| H | 5.63178  | 2.81018  | -3.18678 |
| H | 7.58481  | 1.46157  | -2.45063 |
| C | -1.49706 | 2.73683  | -0.74007 |
| C | -0.97774 | 4.01542  | -0.44684 |
| C | -2.9     | 2.5888   | -0.60132 |
| C | -1.7855  | 5.09114  | -0.10648 |
| H | 0.08682  | 4.16145  | -0.46816 |
| C | -3.69965 | 3.67385  | -0.23258 |
| C | -3.15779 | 4.92079  | 0.02805  |
| H | -1.32347 | 6.05259  | 0.08955  |
| H | -4.77084 | 3.51577  | -0.1915  |
| H | -3.80175 | 5.74681  | 0.31068  |
| O | -3.52845 | 1.47006  | -1.09659 |
| C | -4.58405 | 0.89049  | -0.41929 |
| C | -5.6071  | 0.36433  | -1.20192 |
| C | -4.61543 | 0.77583  | 0.96922  |
| C | -6.69106 | -0.29041 | -0.61026 |
| H | -5.54142 | 0.47291  | -2.27998 |
| C | -5.69908 | 0.13496  | 1.56015  |
| H | -3.80193 | 1.16675  | 1.56772  |
| C | -6.72881 | -0.39297 | 0.7831   |
| H | -5.73468 | 0.03871  | 2.64076  |
| H | -7.56576 | -0.89079 | 1.26344  |
| H | -0.12184 | -0.86781 | -2.62382 |
| H | 1.64256  | 0.70594  | -2.85628 |
| C | -7.78175 | -0.88462 | -1.46862 |
| H | -8.68419 | -1.08649 | -0.88764 |
| H | -8.0555  | -0.21833 | -2.2911  |
| H | -7.46113 | -1.83217 | -1.915   |

## A1/TS

B3LYP+D3/6-311+G(d,p), C1

| Atom | Cartesian (Hartree/Bohr) |          |          |
|------|--------------------------|----------|----------|
|      | X                        | Y        | Z        |
| C    | 0.58308                  | 0.93666  | -1.44265 |
| C    | -0.44812                 | -0.15677 | -1.11433 |
| C    | -1.14171                 | 0.34548  | 0.12804  |
| C    | 0.26613                  | 2.0782   | -0.49251 |
| N    | -0.91461                 | 1.76555  | 0.23806  |
| O    | -1.67058                 | -0.34047 | 0.95102  |
| O    | 0.91038                  | 3.09354  | -0.40542 |
| C    | 1.96844                  | 0.22727  | -1.30532 |
| C    | 0.3647                   | -1.46994 | -0.89544 |
| C    | 1.52357                  | -1.15979 | -1.89577 |
| O    | 1.95142                  | -1.78089 | -2.81519 |
| C    | 4.65619                  | 1.79501  | 1.99381  |
| C    | 3.81793                  | 1.36743  | 0.98867  |
| C    | 2.97253                  | 0.2496   | 1.17199  |
| C    | 2.95724                  | -0.41856 | 2.43306  |
| C    | 3.84126                  | 0.04203  | 3.43303  |
| C    | 4.67736                  | 1.1175   | 3.22145  |
| C    | 2.09979                  | -0.24153 | 0.14653  |
| C    | 2.01735                  | -1.50575 | 2.6735   |
| C    | 1.08933                  | -1.89256 | 1.65958  |
| C    | 1.19129                  | -1.25058 | 0.38166  |
| C    | 0.11286                  | -2.87099 | 1.95327  |
| H    | -0.62253                 | -3.12594 | 1.20803  |
| C    | 0.07583                  | -3.49119 | 3.18172  |
| C    | 1.01446                  | -3.15053 | 4.16606  |
| C    | 1.95495                  | -2.17464 | 3.91554  |
| H    | 5.29415                  | 2.65749  | 1.83418  |
| H    | 3.79846                  | 1.89998  | 0.05073  |
| H    | 3.86362                  | -0.44305 | 4.39964  |
| H    | 5.34077                  | 1.44728  | 4.01407  |
| H    | -0.68341                 | -4.23845 | 3.38588  |
| H    | 0.99382                  | -3.64273 | 5.13277  |
| H    | 2.65166                  | -1.91876 | 4.70246  |
| C    | -0.36642                 | -2.75963 | -1.12417 |
| C    | 0.36625                  | -3.93862 | -1.29855 |
| C    | -1.76233                 | -2.8228  | -1.15359 |
| C    | -0.28196                 | -5.15289 | -1.4912  |
| H    | 1.44861                  | -3.90508 | -1.27553 |
| C    | -2.41081                 | -4.03951 | -1.34851 |
| H    | -2.36041                 | -1.9387  | -0.97724 |
| C    | -1.67448                 | -5.20833 | -1.51722 |
| H    | 0.30137                  | -6.05822 | -1.62179 |
| H    | -3.49531                 | -4.06637 | -1.35808 |

|   |          |          |          |
|---|----------|----------|----------|
| H | -2.17997 | -6.15681 | -1.66601 |
| C | 3.15119  | 0.83624  | -1.99915 |
| C | 4.31511  | 0.06923  | -2.12635 |
| C | 3.13682  | 2.12915  | -2.52507 |
| C | 5.43857  | 0.58488  | -2.7594  |
| H | 4.34123  | -0.93462 | -1.71913 |
| C | 4.26423  | 2.64661  | -3.16041 |
| H | 2.26757  | 2.75887  | -2.39066 |
| C | 5.41711  | 1.87773  | -3.28069 |
| H | 6.33292  | -0.02287 | -2.84674 |
| H | 4.23978  | 3.65772  | -3.55312 |
| H | 6.29505  | 2.28216  | -3.77338 |
| C | -1.85702 | 2.7717   | 0.66407  |
| C | -1.54382 | 4.12435  | 0.438    |
| C | -3.04723 | 2.51332  | 1.38541  |
| C | -2.35583 | 5.15819  | 0.88286  |
| H | -0.62489 | 4.37465  | -0.06137 |
| C | -3.84333 | 3.56327  | 1.83706  |
| C | -3.50739 | 4.88781  | 1.60988  |
| H | -2.05917 | 6.18032  | 0.67575  |
| H | -4.75009 | 3.29061  | 2.36393  |
| H | -4.13976 | 5.68675  | 1.97992  |
| O | -3.566   | 1.25986  | 1.62889  |
| C | -4.1702  | 0.57841  | 0.59659  |
| C | -4.25514 | 1.0651   | -0.70477 |
| C | -4.65514 | -0.69011 | 0.91308  |
| C | -4.81028 | 0.27362  | -1.71881 |
| H | -3.89289 | 2.05869  | -0.94061 |
| C | -5.20799 | -1.47029 | -0.09034 |
| H | -4.54612 | -1.05119 | 1.92785  |
| C | -5.27867 | -1.00103 | -1.40355 |
| H | -5.57242 | -2.46409 | 0.14814  |
| H | -5.70154 | -1.62797 | -2.18181 |
| H | -1.19085 | -0.27821 | -1.90623 |
| H | 0.47411  | 1.32656  | -2.45821 |
| C | -4.91742 | 0.81751  | -3.12114 |
| H | -4.96334 | 0.01446  | -3.85949 |
| H | -5.8221  | 1.42312  | -3.23917 |
| H | -4.06759 | 1.45776  | -3.37129 |

## A1/PD

B3LYP/6-311+G(d,p), C1

| Atom | Cartesian (Hartree/Bohr) |          |          |
|------|--------------------------|----------|----------|
|      | X                        | Y        | Z        |
| C    | 2.06331                  | 0.50373  | -1.67975 |
| C    | 1.24735                  | -0.78234 | -1.97269 |
| C    | -0.18039                 | -0.30061 | -2.21662 |
| C    | 1.07041                  | 1.65056  | -1.81839 |
| N    | -0.17631                 | 1.10048  | -2.15031 |
| O    | -1.14586                 | -0.97376 | -2.47591 |
| O    | 1.29475                  | 2.82968  | -1.71266 |
| C    | 2.69496                  | 0.273    | -0.26143 |
| C    | 1.48927                  | -1.72477 | -0.73743 |
| C    | 2.95327                  | -1.26075 | -0.43666 |
| O    | 3.96344                  | -1.88567 | -0.35893 |
| C    | 1.37746                  | 3.07837  | 3.07317  |
| C    | 1.75827                  | 2.27072  | 2.0238   |
| C    | 1.16685                  | 1.00134  | 1.8228   |
| C    | 0.1288                   | 0.57005  | 2.70296  |
| C    | -0.22434                 | 1.42088  | 3.77499  |
| C    | 0.38611                  | 2.64319  | 3.96447  |
| C    | 1.55015                  | 0.12245  | 0.751    |
| C    | -0.56361                 | -0.68904 | 2.45763  |
| C    | -0.23851                 | -1.47371 | 1.30958  |
| C    | 0.86442                  | -1.04615 | 0.49134  |
| C    | -0.99978                 | -2.63365 | 1.03323  |
| H    | -0.79038                 | -3.20799 | 0.14414  |
| C    | -2.0082                  | -3.0452  | 1.87706  |
| C    | -2.29709                 | -2.30637 | 3.03291  |
| C    | -1.59391                 | -1.15254 | 3.30602  |
| H    | 1.84261                  | 4.04993  | 3.20336  |
| H    | 2.51384                  | 2.61928  | 1.33585  |
| H    | -1.00297                 | 1.12504  | 4.46601  |
| H    | 0.08704                  | 3.27194  | 4.79722  |
| H    | -2.57452                 | -3.94114 | 1.64427  |
| H    | -3.08362                 | -2.63046 | 3.70666  |
| H    | -1.85471                 | -0.59374 | 4.19515  |
| C    | 1.34263                  | -3.20931 | -0.97191 |
| C    | 1.94753                  | -4.10942 | -0.08366 |
| C    | 0.634                    | -3.72529 | -2.06286 |
| C    | 1.84792                  | -5.48224 | -0.28233 |
| H    | 2.50246                  | -3.73638 | 0.76847  |
| C    | 0.53475                  | -5.10194 | -2.26085 |
| H    | 0.11198                  | -3.05618 | -2.73601 |
| C    | 1.14279                  | -5.98552 | -1.37419 |
| H    | 2.32632                  | -6.16062 | 0.4169   |
| H    | -0.02626                 | -5.47988 | -3.10974 |

|   |          |          |          |
|---|----------|----------|----------|
| H | 1.06668  | -7.05702 | -1.52962 |
| C | 3.93057  | 1.06682  | 0.08824  |
| C | 4.73218  | 0.64342  | 1.15737  |
| C | 4.32518  | 2.19913  | -0.63245 |
| C | 5.89266  | 1.33109  | 1.49435  |
| H | 4.44819  | -0.23147 | 1.73065  |
| C | 5.48965  | 2.88778  | -0.29409 |
| H | 3.69977  | 2.58177  | -1.4295  |
| C | 6.27864  | 2.45619  | 0.76744  |
| H | 6.49925  | 0.98425  | 2.32484  |
| H | 5.77249  | 3.76872  | -0.8616  |
| H | 7.1853   | 2.99212  | 1.02973  |
| C | -1.32302 | 1.90132  | -2.45077 |
| C | -1.35247 | 2.6477   | -3.62473 |
| C | -2.4105  | 1.93518  | -1.56773 |
| C | -2.46318 | 3.42186  | -3.94209 |
| H | -0.49633 | 2.61239  | -4.28915 |
| C | -3.53048 | 2.70307  | -1.89267 |
| C | -3.5504  | 3.44025  | -3.07261 |
| H | -2.47876 | 4.00063  | -4.85862 |
| H | -4.37606 | 2.72682  | -1.21707 |
| H | -4.42557 | 4.03712  | -3.30793 |
| O | -2.28587 | 1.2264   | -0.40561 |
| C | -3.43594 | 0.90444  | 0.31208  |
| C | -4.25507 | -0.1235  | -0.13693 |
| C | -3.70563 | 1.58852  | 1.49195  |
| C | -5.38868 | -0.48787 | 0.59662  |
| H | -3.98847 | -0.64131 | -1.05288 |
| C | -4.83334 | 1.22795  | 2.22456  |
| H | -3.03615 | 2.37526  | 1.81975  |
| C | -5.6681  | 0.2046   | 1.77892  |
| H | -5.06412 | 1.75033  | 3.14756  |
| H | -6.54519 | -0.06311 | 2.36061  |
| H | 1.59101  | -1.28559 | -2.87982 |
| H | 2.86617  | 0.65786  | -2.40521 |
| C | -6.26912 | -1.61803 | 0.12099  |
| H | -7.16364 | -1.71723 | 0.73923  |
| H | -6.59254 | -1.46678 | -0.91292 |
| H | -5.73564 | -2.57327 | 0.15314  |

## A1/PD

B3LYP+D3/6-311+G(d,p), C1

| Atom | Cartesian (Hartree/Bohr) |          |          |
|------|--------------------------|----------|----------|
|      | X                        | Y        | Z        |
| C    | 2.23389                  | 0.27757  | -1.6697  |
| C    | 1.34421                  | -0.95956 | -1.95564 |
| C    | -0.03417                 | -0.38851 | -2.25951 |
| C    | 1.35432                  | 1.48143  | -1.95243 |
| N    | 0.08276                  | 1.0058   | -2.29094 |
| O    | -1.0522                  | -0.99988 | -2.46522 |
| O    | 1.66528                  | 2.64464  | -1.91511 |
| C    | 2.6694                   | 0.10961  | -0.17612 |
| C    | 1.41726                  | -1.84283 | -0.66237 |
| C    | 2.86548                  | -1.4442  | -0.22252 |
| O    | 3.82093                  | -2.11057 | 0.01712  |
| C    | 1.07846                  | 3.2622   | 2.6745   |
| C    | 1.54843                  | 2.34723  | 1.7586   |
| C    | 0.94199                  | 1.07875  | 1.6219   |
| C    | -0.19705                 | 0.75536  | 2.41718  |
| C    | -0.63661                 | 1.71147  | 3.35751  |
| C    | -0.014                   | 2.9349   | 3.49099  |
| C    | 1.40421                  | 0.09531  | 0.68812  |
| C    | -0.90605                 | -0.49799 | 2.20494  |
| C    | -0.50399                 | -1.37956 | 1.1569   |
| C    | 0.69585                  | -1.05886 | 0.44069  |
| C    | -1.283                   | -2.52626 | 0.88397  |
| H    | -1.01263                 | -3.17081 | 0.06359  |
| C    | -2.3842                  | -2.83524 | 1.65046  |
| C    | -2.75395                 | -2.00027 | 2.71342  |
| C    | -2.03355                 | -0.85574 | 2.97379  |
| H    | -0.26938                 | -5.59685 | -2.89053 |
| H    | 0.52488                  | -7.1385  | -1.11242 |
| C    | 3.86984                  | 0.87435  | 0.29904  |
| C    | 4.43307                  | 0.52846  | 1.53247  |
| C    | 4.4447                   | 1.91138  | -0.43758 |
| C    | 5.54377                  | 1.20524  | 2.01919  |
| H    | 3.99217                  | -0.27138 | 2.11595  |
| C    | 5.55976                  | 2.59012  | 0.05105  |
| H    | 3.99046                  | 2.23364  | -1.36517 |
| C    | 6.11331                  | 2.23977  | 1.27816  |
| H    | 5.96682                  | 0.92509  | 2.97809  |
| H    | 5.9877                   | 3.40122  | -0.5287  |
| H    | 6.97984                  | 2.77045  | 1.65846  |
| C    | -1.01439                 | 1.86767  | -2.58078 |
| C    | -1.06445                 | 2.56088  | -3.78317 |
| C    | -2.04549                 | 1.99347  | -1.64566 |
| C    | -2.15502                 | 3.37233  | -4.07664 |

|   |          |          |          |
|---|----------|----------|----------|
| H | -0.24627 | 2.45053  | -4.48531 |
| C | -3.15023 | 2.78874  | -1.94729 |
| C | -3.19658 | 3.47325  | -3.15796 |
| H | -2.19366 | 3.91308  | -5.01497 |
| H | -3.95996 | 2.87271  | -1.23435 |
| H | -4.05757 | 4.09462  | -3.37995 |
| O | -1.8809  | 1.3326   | -0.46168 |
| C | -3.02059 | 1.04946  | 0.28427  |
| C | -3.76483 | -0.07252 | -0.04016 |
| C | -3.35751 | 1.87236  | 1.35133  |
| C | -4.89232 | -0.40137 | 0.7164   |
| H | -3.43806 | -0.69021 | -0.86942 |
| C | -4.47932 | 1.54667  | 2.10637  |
| H | -2.73805 | 2.73029  | 1.58014  |
| C | -5.23978 | 0.42251  | 1.78926  |
| H | -4.76222 | 2.17216  | 2.94673  |
| H | -6.11112 | 0.17801  | 2.38875  |
| H | 1.69185  | -1.52919 | -2.81944 |
| H | 3.12099  | 0.31983  | -2.30438 |
| C | -5.68927 | -1.63438 | 0.38163  |
| H | -6.53644 | -1.76198 | 1.05832  |
| H | -6.07931 | -1.59171 | -0.63933 |
| H | -5.06477 | -2.52955 | 0.44952  |



## A2/RC

B3LYP/6-311+G(d,p), C1

| Atom | Cartesian (Hartree/Bohr) |          |          |
|------|--------------------------|----------|----------|
|      | X                        | Y        | Z        |
| C    | 0.35882                  | 0.48343  | -1.39733 |
| C    | 1.27387                  | -0.73668 | -1.68005 |
| C    | 0.71804                  | -1.86273 | -0.81719 |
| C    | -0.65711                 | -0.00934 | -0.37384 |
| N    | -0.37162                 | -1.35213 | -0.09689 |
| O    | 1.11195                  | -2.99931 | -0.75345 |
| O    | -1.56292                 | 0.61755  | 0.1169   |
| C    | 1.32596                  | 1.62651  | -0.91478 |
| C    | 2.72888                  | -0.25101 | -1.331   |
| C    | 2.54354                  | 1.22558  | -1.81032 |
| O    | 3.15052                  | 1.85764  | -2.61583 |
| C    | 0.74354                  | 3.24934  | 3.30524  |
| C    | 0.86824                  | 2.7485   | 2.02793  |
| C    | 1.76167                  | 1.69012  | 1.73802  |
| C    | 2.51098                  | 1.10355  | 2.80337  |
| C    | 2.36719                  | 1.65613  | 4.0964   |
| C    | 1.51125                  | 2.70775  | 4.34614  |
| C    | 1.94932                  | 1.16495  | 0.41169  |
| C    | 3.35597                  | -0.05783 | 2.55097  |
| C    | 3.44685                  | -0.60671 | 1.23506  |
| C    | 2.75755                  | 0.07291  | 0.17066  |
| C    | 4.18987                  | -1.79455 | 1.03518  |
| H    | 4.22764                  | -2.23777 | 0.05185  |
| C    | 4.85773                  | -2.40369 | 2.07499  |
| C    | 4.80767                  | -1.8447  | 3.36011  |
| C    | 4.06779                  | -0.70361 | 3.58771  |
| H    | 0.05023                  | 4.0605   | 3.50156  |
| H    | 0.26811                  | 3.16875  | 1.23567  |
| H    | 2.93147                  | 1.24806  | 4.92477  |
| H    | 1.42471                  | 3.10519  | 5.35236  |
| H    | 5.41822                  | -3.31527 | 1.89613  |
| H    | 5.33929                  | -2.31507 | 4.18115  |
| H    | 4.03143                  | -0.30986 | 4.59505  |
| C    | 3.87765                  | -0.97543 | -1.99055 |
| C    | 5.13735                  | -0.36195 | -2.03372 |
| C    | 3.72842                  | -2.23351 | -2.58455 |
| C    | 6.214                    | -0.98773 | -2.65262 |
| H    | 5.27825                  | 0.61347  | -1.58312 |
| C    | 4.80868                  | -2.85972 | -3.20523 |
| H    | 2.78145                  | -2.75528 | -2.52195 |
| C    | 6.0537                   | -2.23972 | -3.24418 |
| H    | 7.17992                  | -0.4934  | -2.67615 |
| H    | 4.67217                  | -3.83902 | -3.65287 |

|   |          |          |          |
|---|----------|----------|----------|
| H | 6.89377  | -2.72734 | -3.72847 |
| C | 0.8623   | 3.05052  | -1.1041  |
| C | 1.80509  | 4.08721  | -1.06443 |
| C | -0.47698 | 3.37692  | -1.34325 |
| C | 1.41944  | 5.40907  | -1.25838 |
| H | 2.84891  | 3.86014  | -0.88265 |
| C | -0.86252 | 4.70266  | -1.53856 |
| H | -1.23508 | 2.60369  | -1.33029 |
| C | 0.08286  | 5.72295  | -1.49948 |
| H | 2.1665   | 6.19566  | -1.22541 |
| H | -1.90804 | 4.93384  | -1.71614 |
| H | -0.21767 | 6.75451  | -1.65295 |
| C | -1.17495 | -2.14854 | 0.77636  |
| C | -0.67124 | -2.58721 | 1.99703  |
| C | -2.47707 | -2.48517 | 0.3881   |
| C | -1.46757 | -3.3477  | 2.84675  |
| H | 0.34176  | -2.3204  | 2.27492  |
| C | -3.27828 | -3.23922 | 1.24489  |
| C | -2.77046 | -3.66551 | 2.46823  |
| H | -1.07366 | -3.68633 | 3.79834  |
| H | -4.28713 | -3.49455 | 0.94318  |
| H | -3.39853 | -4.25727 | 3.12613  |
| O | -2.87706 | -2.09832 | -0.86573 |
| C | -4.20205 | -1.72616 | -1.0769  |
| C | -4.77638 | -0.70702 | -0.31776 |
| C | -4.89296 | -2.34243 | -2.10903 |
| C | -6.08253 | -0.28323 | -0.5731  |
| H | -4.16947 | -0.24522 | 0.44927  |
| C | -6.19421 | -1.91866 | -2.37635 |
| H | -4.41435 | -3.12621 | -2.68493 |
| C | -6.78016 | -0.91148 | -1.61878 |
| H | -6.75509 | -2.38443 | -3.1804  |
| H | -7.79472 | -0.60775 | -1.85216 |
| H | 1.23756  | -1.04968 | -2.72578 |
| H | -0.17855 | 0.81231  | -2.28959 |
| C | -6.74906 | 0.84649  | 0.23214  |
| C | -8.06091 | 0.32755  | 0.86295  |
| H | -8.5415  | 1.11828  | 1.44718  |
| H | -8.77754 | -0.00459 | 0.10829  |
| H | -7.86898 | -0.51557 | 1.53219  |
| C | -7.06805 | 2.02677  | -0.71322 |
| H | -7.74342 | 1.7332   | -1.52027 |
| H | -7.54629 | 2.84102  | -0.15981 |
| H | -6.15583 | 2.42     | -1.16991 |
| C | -5.84689 | 1.36743  | 1.36452  |
| H | -5.59922 | 0.58253  | 2.08433  |
| H | -4.91068 | 1.78665  | 0.98766  |
| H | -6.36311 | 2.161    | 1.91157  |

## A2/RC

B3LYP+D3/6-311+G(d,p), C1

| Atom | Cartesian (Hartree/Bohr) |             |             |
|------|--------------------------|-------------|-------------|
|      | X                        | Y           | Z           |
| C    | 0.50268300               | 0.68873500  | -1.02785800 |
| C    | 0.24789600               | -0.59540600 | -1.46103900 |
| C    | 0.01614700               | -1.59090500 | -0.33499300 |
| C    | -1.18400800              | 0.33126800  | 0.27968100  |
| N    | -0.78190000              | -0.96059300 | 0.63299600  |
| O    | 0.43725400               | -2.71455200 | -0.25239700 |
| O    | -1.93055100              | 1.02501600  | 0.92582700  |
| C    | 0.62579300               | 1.77284700  | -0.86571900 |
| C    | 1.75880200               | -0.17376900 | -1.60095700 |
| C    | 1.51704800               | 1.29708400  | -2.05400900 |
| O    | 1.90035600               | 1.88743100  | -3.01373500 |
| C    | 0.88070200               | 3.15196800  | 3.44673800  |
| C    | 0.81046700               | 2.77145600  | 2.12486500  |
| C    | 1.62425800               | 1.73103700  | 1.61738400  |
| C    | 2.51605300               | 1.04887200  | 2.50011400  |
| C    | 2.56605700               | 1.47600600  | 3.84701900  |
| C    | 1.77324900               | 2.50374500  | 4.31349700  |
| C    | 1.54563000               | 1.27655600  | 0.25741800  |
| C    | 3.28915100               | -0.09127700 | 2.02290900  |
| C    | 3.10852000               | -0.57348400 | 0.69002300  |
| C    | 2.22746000               | 0.16032500  | -0.17602000 |
| C    | 3.78225800               | -1.75011500 | 0.28708600  |
| H    | 3.61976600               | -2.14355000 | -0.70331300 |
| C    | 4.63999800               | -2.40868700 | 1.13983800  |
| C    | 4.85895600               | -1.91230400 | 2.43307300  |
| C    | 4.19232900               | -0.78383700 | 2.86060200  |
| H    | 0.23938200               | 3.94588000  | 3.81451000  |
| H    | 0.10769900               | 3.26307000  | 1.47088800  |
| H    | 3.22412200               | 0.97933800  | 4.54784300  |
| H    | 1.83336200               | 2.79984600  | 5.35589100  |
| H    | 5.14337000               | -3.31037700 | 0.80735400  |
| H    | 5.54439500               | -2.42021000 | 3.10387000  |
| H    | 4.37546000               | -0.43184400 | 3.86744000  |
| C    | 2.61950100               | -0.99052200 | -2.52504700 |
| C    | 3.83109000               | -0.45285400 | -2.97729600 |
| C    | 2.25896500               | -2.27685700 | -2.93792600 |
| C    | 4.66093300               | -1.18352800 | -3.82057500 |
| H    | 4.12548800               | 0.54213200  | -2.66572600 |
| C    | 3.09151100               | -3.00838200 | -3.78334400 |
| H    | 1.35812900               | -2.73775500 | -2.55267700 |
| C    | 4.29338400               | -2.46514000 | -4.22877700 |
| H    | 5.59636900               | -0.75074900 | -4.16030200 |
| H    | 2.80072100               | -4.00977200 | -4.08428800 |

|   |             |             |             |
|---|-------------|-------------|-------------|
| H | 4.94168800  | -3.03613500 | -4.88570100 |
| C | 0.23469600  | 3.22352000  | -0.92745000 |
| C | 1.24370300  | 4.18201700  | -1.08502900 |
| C | -1.09070900 | 3.65408800  | -0.83175200 |
| C | 0.93422100  | 5.53594500  | -1.14484800 |
| H | 2.27717600  | 3.86298400  | -1.15889600 |
| C | -1.40160500 | 5.01165200  | -0.89286600 |
| H | -1.88101100 | 2.93925900  | -0.64856700 |
| C | -0.39211800 | 5.95668200  | -1.05089000 |
| H | 1.72960800  | 6.26413900  | -1.26648200 |
| H | -2.43676800 | 5.32644100  | -0.80767600 |
| H | -0.63429100 | 7.01361000  | -1.09682700 |
| C | -1.14923800 | -1.57727100 | 1.86539400  |
| C | -0.70069200 | -1.01462200 | 3.05884200  |
| C | -1.93815000 | -2.73620400 | 1.88692100  |
| C | -1.01456800 | -1.60861300 | 4.27516600  |
| H | -0.09556200 | -0.11636000 | 3.01796000  |
| C | -2.23848000 | -3.33453400 | 3.10895000  |
| C | -1.77538600 | -2.77697600 | 4.29578300  |
| H | -0.65623800 | -1.16668700 | 5.19798500  |
| H | -2.83862600 | -4.23687200 | 3.09946600  |
| H | -2.01813600 | -3.25348900 | 5.23973000  |
| O | -2.38834100 | -3.36569200 | 0.75267300  |
| C | -2.97042500 | -2.63125400 | -0.26734800 |
| C | -3.81427000 | -1.55425700 | -0.00288200 |
| C | -2.69039600 | -3.02946800 | -1.56793800 |
| C | -4.37566200 | -0.81651500 | -1.04695800 |
| H | -3.98834500 | -1.28356700 | 1.02898800  |
| C | -3.26086500 | -2.30973200 | -2.61546700 |
| H | -2.02457500 | -3.86764500 | -1.73333100 |
| C | -4.08118800 | -1.21440300 | -2.36121200 |
| H | -3.05366300 | -2.60145000 | -3.64025200 |
| H | -4.49989800 | -0.66863600 | -3.19919500 |
| H | -0.13091000 | -1.00584900 | -2.39745100 |
| H | -1.24794700 | 1.01482700  | -1.75410900 |
| C | -5.28207000 | 0.39836200  | -0.79148100 |
| C | -6.67389800 | 0.13363400  | -1.40475300 |
| H | -7.33535600 | 0.98799700  | -1.23129200 |
| H | -6.62096400 | -0.03087400 | -2.48356700 |
| H | -7.13665000 | -0.74956400 | -0.95612900 |
| C | -4.65498900 | 1.64624400  | -1.45045400 |
| H | -4.52617800 | 1.52473600  | -2.52834300 |
| H | -5.29015800 | 2.52261000  | -1.29002200 |
| H | -3.67824400 | 1.85396000  | -1.01029900 |
| C | -5.45377100 | 0.69353600  | 0.70861500  |
| H | -5.93200900 | -0.13740100 | 1.23490700  |
| H | -4.49590200 | 0.90591700  | 1.18816600  |
| H | -6.09338600 | 1.57059600  | 0.83935100  |

## A2/TS

B3LYP/6-311+G(d,p), C1

| Atom | Cartesian (Hartree/Bohr) |          |          |
|------|--------------------------|----------|----------|
|      | X                        | Y        | Z        |
| C    | 1.8064                   | 0.42791  | -1.85654 |
| C    | 0.64791                  | -0.53864 | -1.57752 |
| C    | -0.38779                 | 0.28751  | -0.83788 |
| C    | 1.32633                  | 1.7796   | -1.35996 |
| N    | 0.03196                  | 1.65917  | -0.76607 |
| O    | -1.34205                 | -0.17588 | -0.27808 |
| O    | 1.96382                  | 2.79542  | -1.49284 |
| C    | 3.05763                  | -0.20294 | -1.14041 |
| C    | 1.2694                   | -1.72259 | -0.74576 |
| C    | 2.67866                  | -1.69531 | -1.4195  |
| O    | 3.28717                  | -2.55189 | -1.97855 |
| C    | 4.92379                  | 2.18785  | 2.25318  |
| C    | 4.34039                  | 1.51063  | 1.20461  |
| C    | 3.36905                  | 0.50658  | 1.4295   |
| C    | 2.95731                  | 0.22433  | 2.76747  |
| C    | 3.5903                   | 0.92966  | 3.81607  |
| C    | 4.55518                  | 1.88399  | 3.5716   |
| C    | 2.75751                  | -0.24166 | 0.3641   |
| C    | 1.88103                  | -0.72787 | 3.01635  |
| C    | 1.22345                  | -1.37029 | 1.92291  |
| C    | 1.72899                  | -1.13145 | 0.59738  |
| C    | 0.10767                  | -2.20018 | 2.18303  |
| H    | -0.42475                 | -2.64783 | 1.35821  |
| C    | -0.32146                 | -2.43727 | 3.47057  |
| C    | 0.3518                   | -1.84951 | 4.55107  |
| C    | 1.42162                  | -1.01006 | 4.32288  |
| H    | 5.66472                  | 2.95532  | 2.05495  |
| H    | 4.62616                  | 1.75578  | 0.19273  |
| H    | 3.31104                  | 0.73626  | 4.84355  |
| H    | 5.01695                  | 2.40839  | 4.40209  |
| H    | -1.18149                 | -3.07576 | 3.64336  |
| H    | 0.02474                  | -2.04151 | 5.56804  |
| H    | 1.90671                  | -0.55516 | 5.17665  |
| C    | 0.58052                  | -3.06409 | -0.81319 |
| C    | 1.2866                   | -4.21225 | -0.42777 |
| C    | -0.73306                 | -3.21376 | -1.27067 |
| C    | 0.69737                  | -5.46967 | -0.49888 |
| H    | 2.30571                  | -4.1239  | -0.07059 |
| C    | -1.32299                 | -4.47501 | -1.34284 |
| H    | -1.32257                 | -2.34195 | -1.52463 |
| C    | -0.61074                 | -5.60738 | -0.96012 |
| H    | 1.26366                  | -6.34473 | -0.19638 |
| H    | -2.34639                 | -4.56616 | -1.69262 |

|   |          |          |          |
|---|----------|----------|----------|
| H | -1.07041 | -6.58895 | -1.01673 |
| C | 4.42813  | 0.17892  | -1.64543 |
| C | 5.52677  | -0.61087 | -1.27789 |
| C | 4.64715  | 1.26975  | -2.49303 |
| C | 6.80399  | -0.31687 | -1.74103 |
| H | 5.38277  | -1.46315 | -0.62392 |
| C | 5.92882  | 1.56319  | -2.95849 |
| H | 3.82791  | 1.92666  | -2.75645 |
| C | 7.01097  | 0.7719   | -2.58676 |
| H | 7.63931  | -0.94283 | -1.44378 |
| H | 6.07658  | 2.41932  | -3.6091  |
| H | 8.00783  | 1.00099  | -2.9497  |
| C | -0.84325 | 2.82059  | -0.6589  |
| C | -0.23408 | 4.07558  | -0.44745 |
| C | -2.23675 | 2.7557   | -0.40717 |
| C | -0.9531  | 5.20466  | -0.08215 |
| H | 0.83193  | 4.16055  | -0.55441 |
| C | -2.94514 | 3.89447  | -0.01409 |
| C | -2.31795 | 5.11584  | 0.16232  |
| H | -0.42576 | 6.14358  | 0.04672  |
| H | -4.01675 | 3.79867  | 0.11449  |
| H | -2.8923  | 5.98472  | 0.46584  |
| O | -2.96078 | 1.66039  | -0.81617 |
| C | -3.9977  | 1.16643  | -0.04686 |
| C | -5.10165 | 0.68187  | -0.74803 |
| C | -3.93889 | 1.09361  | 1.33939  |
| C | -6.18785 | 0.11419  | -0.07817 |
| H | -5.0769  | 0.76438  | -1.8267  |
| C | -5.02182 | 0.53686  | 2.01527  |
| H | -3.06482 | 1.44688  | 1.8724   |
| C | -6.12812 | 0.05617  | 1.32322  |
| H | -4.99371 | 0.46831  | 3.09832  |
| H | -6.9504  | -0.37187 | 1.88598  |
| H | 0.19599  | -0.92438 | -2.49477 |
| H | 2.02164  | 0.5344   | -2.92235 |
| C | -7.42401 | -0.4238  | -0.82091 |
| C | -8.67368 | 0.3697   | -0.37712 |
| H | -9.56676 | -0.00416 | -0.88769 |
| H | -8.84836 | 0.28838  | 0.69798  |
| H | -8.56892 | 1.43166  | -0.61612 |
| C | -7.62005 | -1.91859 | -0.48117 |
| H | -7.77509 | -2.07879 | 0.58806  |
| H | -8.49377 | -2.31844 | -1.00526 |
| H | -6.74835 | -2.50673 | -0.78058 |
| C | -7.29306 | -0.2949  | -2.34842 |
| H | -7.18667 | 0.7463   | -2.66461 |
| H | -6.43809 | -0.8565  | -2.73464 |
| H | -8.18992 | -0.69164 | -2.83183 |

## A2/TS

B3LYP+D3/6-311+G(d,p), C1

---

| Atom | Cartesian (Hartree/Bohr) |          |          |
|------|--------------------------|----------|----------|
|      | X                        | Y        | Z        |
| C    | 0.5861                   | 1.05289  | -1.18756 |
| C    | -0.33058                 | -0.11163 | -0.77511 |
| C    | -0.78937                 | 0.24792  | 0.61573  |
| C    | 0.42952                  | 2.0883   | -0.08772 |
| N    | -0.59055                 | 1.66497  | 0.81191  |
| O    | -1.13076                 | -0.52538 | 1.46007  |
| O    | 1.05616                  | 3.1156   | -0.01901 |
| C    | 1.98808                  | 0.39769  | -1.39265 |
| C    | 0.54212                  | -1.40105 | -0.84916 |
| C    | 1.47162                  | -0.94793 | -2.0201  |
| O    | 1.72437                  | -1.46158 | -3.06245 |
| C    | 5.21612                  | 1.79002  | 1.46938  |
| C    | 4.21285                  | 1.413    | 0.60511  |
| C    | 3.45609                  | 0.24158  | 0.83497  |
| C    | 3.70871                  | -0.53862 | 2.00285  |
| C    | 4.75406                  | -0.12537 | 2.85744  |
| C    | 5.49733                  | 1.00634  | 2.59779  |
| C    | 2.41482                  | -0.19576 | -0.04717 |
| C    | 2.86908                  | -1.68957 | 2.30867  |
| C    | 1.76911                  | -2.02404 | 1.46152  |
| C    | 1.59872                  | -1.26334 | 0.25834  |
| C    | 0.8987                   | -3.07105 | 1.83984  |
| H    | 0.03704                  | -3.28936 | 1.23047  |
| C    | 1.12587                  | -3.80528 | 2.98202  |
| C    | 2.23333                  | -3.51533 | 3.79186  |
| C    | 3.07641                  | -2.47583 | 3.46288  |
| H    | 5.78211                  | 2.69512  | 1.27752  |
| H    | 3.9939                   | 2.02753  | -0.25409 |
| H    | 4.97773                  | -0.69221 | 3.75123  |
| H    | 6.28993                  | 1.29737  | 3.27913  |
| H    | 0.44399                  | -4.60368 | 3.25423  |
| H    | 2.42088                  | -4.09795 | 4.68772  |
| H    | 3.91051                  | -2.26328 | 4.11808  |
| C    | -0.19006                 | -2.69281 | -1.0612  |
| C    | 0.51873                  | -3.82009 | -1.49032 |
| C    | -1.56442                 | -2.80698 | -0.83449 |
| C    | -0.13066                 | -5.03427 | -1.68049 |
| H    | 1.58446                  | -3.74685 | -1.66979 |
| C    | -2.21437                 | -4.02314 | -1.02676 |
| H    | -2.13691                 | -1.96819 | -0.46319 |
| C    | -1.50116                 | -5.14094 | -1.44908 |
| H    | 0.43452                  | -5.89937 | -2.01089 |
| H    | -3.27989                 | -4.0894  | -0.83434 |

---

|   |          |          |          |
|---|----------|----------|----------|
| H | -2.00688 | -6.08959 | -1.59596 |
| C | 2.99487  | 1.12026  | -2.2383  |
| C | 4.13394  | 0.42282  | -2.65685 |
| C | 2.84089  | 2.45173  | -2.62789 |
| C | 5.09797  | 1.04354  | -3.44047 |
| H | 4.26825  | -0.61009 | -2.35781 |
| C | 3.8077   | 3.0744   | -3.41538 |
| H | 1.9965   | 3.02697  | -2.27207 |
| C | 4.93787  | 2.37418  | -3.82424 |
| H | 5.9761   | 0.48835  | -3.75277 |
| H | 3.67771  | 4.11339  | -3.69956 |
| H | 5.69151  | 2.86081  | -4.43438 |
| C | -1.50347 | 2.59323  | 1.43279  |
| C | -1.28431 | 3.9715   | 1.25704  |
| C | -2.55806 | 2.22815  | 2.30294  |
| C | -2.06476 | 4.93197  | 1.8847   |
| H | -0.45956 | 4.29924  | 0.64935  |
| C | -3.32342 | 3.20545  | 2.93536  |
| C | -3.0828  | 4.55713  | 2.75157  |
| H | -1.84659 | 5.9791   | 1.70709  |
| H | -4.12954 | 2.85397  | 3.56839  |
| H | -3.68755 | 5.29769  | 3.26241  |
| O | -2.98335 | 0.93701  | 2.53436  |
| C | -3.69242 | 0.27743  | 1.55479  |
| C | -3.85342 | 0.77274  | 0.26116  |
| C | -4.18873 | -0.97338 | 1.90369  |
| C | -4.47794 | 0.00352  | -0.72578 |
| H | -3.47624 | 1.75652  | 0.02644  |
| C | -4.83816 | -1.72753 | 0.93557  |
| H | -4.0271  | -1.34227 | 2.90877  |
| C | -4.97491 | -1.25455 | -0.36735 |
| H | -5.2267  | -2.70673 | 1.19563  |
| H | -5.4687  | -1.87608 | -1.10492 |
| H | -1.20849 | -0.19341 | -1.41912 |
| H | 0.26519  | 1.5279   | -2.11881 |
| C | -4.61078 | 0.50098  | -2.17137 |
| C | -6.10479 | 0.66488  | -2.51565 |
| H | -6.22677 | 1.01118  | -3.54627 |
| H | -6.64601 | -0.27791 | -2.41391 |
| H | -6.57899 | 1.39342  | -1.85324 |
| C | -3.97432 | -0.52742 | -3.12913 |
| H | -4.46172 | -1.50168 | -3.06878 |
| H | -4.05028 | -0.18205 | -4.16399 |
| H | -2.91599 | -0.68175 | -2.90297 |
| C | -3.91273 | 1.85179  | -2.39126 |
| H | -4.34546 | 2.64394  | -1.7757  |
| H | -2.84245 | 1.79874  | -2.17065 |
| H | -4.01597 | 2.15573  | -3.43545 |

---

## A2/PD

B3LYP/6-311+G(d,p), C1

| Atom | Cartesian (Hartree/Bohr) |          |          |
|------|--------------------------|----------|----------|
|      | X                        | Y        | Z        |
| C    | 2.41807                  | 0.29196  | -1.7766  |
| C    | 1.31717                  | -0.77624 | -2.00447 |
| C    | 0.01004                  | 0.00774  | -2.07553 |
| C    | 1.68259                  | 1.62448  | -1.73495 |
| N    | 0.31646                  | 1.36938  | -1.93263 |
| O    | -1.09421                 | -0.43106 | -2.27933 |
| O    | 2.16498                  | 2.72105  | -1.60565 |
| C    | 3.16023                  | -0.15297 | -0.46765 |
| C    | 1.48986                  | -1.81114 | -0.83114 |
| C    | 3.04691                  | -1.69312 | -0.71893 |
| O    | 3.89339                  | -2.5263  | -0.79733 |
| C    | 2.94568                  | 2.66274  | 3.10335  |
| C    | 2.99865                  | 1.85624  | 1.98761  |
| C    | 2.11461                  | 0.76302  | 1.8295   |
| C    | 1.12688                  | 0.51717  | 2.83065  |
| C    | 1.11247                  | 1.35922  | 3.96584  |
| C    | 2.00151                  | 2.40408  | 4.10723  |
| C    | 2.14965                  | -0.11076 | 0.68794  |
| C    | 0.1455                   | -0.54473 | 2.64494  |
| C    | 0.13503                  | -1.30883 | 1.43848  |
| C    | 1.19153                  | -1.0833  | 0.48842  |
| C    | -0.89629                 | -2.25551 | 1.23509  |
| H    | -0.93726                 | -2.80533 | 0.30748  |
| C    | -1.85342                 | -2.48854 | 2.19846  |
| C    | -1.81376                 | -1.78168 | 3.40829  |
| C    | -0.84036                 | -0.82792 | 3.61659  |
| H    | 3.63054                  | 3.49888  | 3.19844  |
| H    | 3.72014                  | 2.07197  | 1.21421  |
| H    | 0.38021                  | 1.20153  | 4.74711  |
| H    | 1.95786                  | 3.03321  | 4.99065  |
| H    | -2.63343                 | -3.22091 | 2.01829  |
| H    | -2.55704                 | -1.97106 | 4.17593  |
| H    | -0.84658                 | -0.28625 | 4.55349  |
| C    | 0.99195                  | -3.21514 | -1.07826 |
| C    | 1.48048                  | -4.26581 | -0.28916 |
| C    | 0.06857                  | -3.51304 | -2.0866  |
| C    | 1.05968                  | -5.57361 | -0.50421 |
| H    | 2.19617                  | -4.06198 | 0.49804  |
| C    | -0.35207                 | -4.82505 | -2.3017  |
| H    | -0.36595                 | -2.71571 | -2.67696 |
| C    | 0.14291                  | -5.86016 | -1.51441 |
| H    | 1.45264                  | -6.37182 | 0.11739  |
| H    | -1.07421                 | -5.03238 | -3.08512 |

|   |          |          |          |
|---|----------|----------|----------|
| H | -0.1838  | -6.88138 | -1.68304 |
| C | 4.57531  | 0.33605  | -0.27017 |
| C | 5.39775  | -0.31691 | 0.65839  |
| C | 5.10945  | 1.40511  | -0.99748 |
| C | 6.71378  | 0.08719  | 0.85301  |
| H | 5.00708  | -1.14836 | 1.23324  |
| C | 6.42969  | 1.80936  | -0.80191 |
| H | 4.48313  | 1.96209  | -1.68312 |
| C | 7.2371   | 1.15183  | 0.12098  |
| H | 7.33318  | -0.43338 | 1.57639  |
| H | 6.82122  | 2.64672  | -1.37078 |
| H | 8.26467  | 1.46682  | 0.27241  |
| C | -0.65433 | 2.41033  | -2.07363 |
| C | -0.54937 | 3.30795  | -3.13338 |
| C | -1.70657 | 2.52732  | -1.15569 |
| C | -1.49205 | 4.31539  | -3.30196 |
| H | 0.27792  | 3.20666  | -3.82627 |
| C | -2.66073 | 3.53132  | -1.33515 |
| C | -2.54921 | 4.41762  | -2.40109 |
| H | -1.40267 | 5.00959  | -4.12985 |
| H | -3.47877 | 3.61928  | -0.63113 |
| H | -3.29451 | 5.19704  | -2.52184 |
| O | -1.71289 | 1.66494  | -0.09545 |
| C | -2.92609 | 1.38952  | 0.53396  |
| C | -3.87803 | 0.61574  | -0.12733 |
| C | -3.12769 | 1.84882  | 1.8254   |
| C | -5.08223 | 0.28572  | 0.49877  |
| H | -3.63922 | 0.27084  | -1.12458 |
| C | -4.32541 | 1.52037  | 2.46006  |
| H | -2.36077 | 2.43847  | 2.31387  |
| C | -5.28592 | 0.75738  | 1.80671  |
| H | -4.50888 | 1.86619  | 3.47245  |
| H | -6.20623 | 0.52088  | 2.32958  |
| H | 1.44432  | -1.29761 | -2.95645 |
| H | 3.13582  | 0.32496  | -2.60027 |
| C | -6.15658 | -0.57724 | -0.18678 |
| C | -7.48794 | 0.2049   | -0.24564 |
| H | -8.2614  | -0.39399 | -0.73623 |
| H | -7.85609 | 0.46595  | 0.74917  |
| H | -7.37298 | 1.13354  | -0.81127 |
| C | -6.36157 | -1.87627 | 0.62516  |
| H | -6.68703 | -1.67173 | 1.64788  |
| H | -7.12289 | -2.50619 | 0.1546   |
| H | -5.43436 | -2.45291 | 0.6813   |
| C | -5.76584 | -0.96488 | -1.62371 |
| H | -5.62781 | -0.08731 | -2.26108 |
| H | -4.84563 | -1.55357 | -1.65686 |
| H | -6.5583  | -1.57151 | -2.0704  |

## A2/PD

B3LYP+D3/6-311+G(d,p), C1

| Atom | Cartesian (Hartree/Bohr) |             |             |
|------|--------------------------|-------------|-------------|
|      | X                        | Y           | Z           |
| C    | 2.63142400               | 0.00917300  | 1.68790300  |
| C    | 1.51977600               | 1.05635400  | 1.95222300  |
| C    | 0.25675900               | 0.23420100  | 2.18496400  |
| C    | 1.98097900               | -1.34112900 | 1.92903500  |
| N    | 0.62639300               | -1.11598400 | 2.20192500  |
| O    | -0.86463400              | 0.64525300  | 2.35047800  |
| O    | 2.50816000               | -2.42429400 | 1.90865500  |
| C    | 3.07643100               | 0.27971600  | 0.21093500  |
| C    | 1.48635500               | 1.97744700  | 0.67921700  |
| C    | 2.99232200               | 1.84006400  | 0.28615600  |
| O    | 3.82557900               | 2.66591100  | 0.08641700  |
| C    | 2.09971800               | -3.10945500 | -2.64555300 |
| C    | 2.39831400               | -2.11167500 | -1.74380700 |
| C    | 1.58422700               | -0.96105600 | -1.63288800 |
| C    | 0.41723500               | -0.84668700 | -2.44574900 |
| C    | 0.15391500               | -1.88291400 | -3.36942900 |
| C    | 0.97458700               | -2.98709600 | -3.47455800 |
| C    | 1.85470900               | 0.09227700  | -0.69771900 |
| C    | -0.48882900              | 0.28037700  | -2.26990000 |
| C    | -0.26097100              | 1.22840200  | -1.22635500 |
| C    | 0.95277400               | 1.10850700  | -0.46879500 |
| C    | -1.21639000              | 2.24658400  | -1.00169000 |
| H    | -1.07402300              | 2.94139100  | -0.19015000 |
| C    | -2.32785900              | 2.37053800  | -1.80498900 |
| C    | -2.53508000              | 1.46854200  | -2.85804000 |
| C    | -1.63831600              | 0.44543600  | -3.07377100 |
| H    | 2.73219700               | -3.98876400 | -2.70751400 |
| H    | 3.25751200               | -2.21984200 | -1.09904200 |
| H    | -0.72267300              | -1.83372200 | -4.00177700 |
| H    | 0.73787300               | -3.76794500 | -4.19044500 |
| H    | -3.03961400              | 3.16728000  | -1.61687500 |
| H    | -3.41115300              | 1.55836200  | -3.49112800 |
| H    | -1.84088500              | -0.25065600 | -3.87614500 |
| C    | 0.99416300               | 3.38592100  | 0.87336900  |
| C    | 1.34278400               | 4.37061000  | -0.05966800 |
| C    | 0.16876500               | 3.73893300  | 1.94626200  |
| C    | 0.87686200               | 5.67392900  | 0.07736000  |
| H    | 1.97760900               | 4.11442500  | -0.89848400 |
| C    | -0.29757400              | 5.04524700  | 2.08207600  |
| H    | -0.16605800              | 2.98177000  | 2.64436100  |
| C    | 0.05505300               | 6.01745900  | 1.14989000  |
| H    | 1.15639600               | 6.42308100  | -0.65639300 |
| H    | -0.94649200              | 5.29735100  | 2.91475400  |

|   |             |             |             |
|---|-------------|-------------|-------------|
| H | -0.30976500 | 7.03421400  | 1.25504500  |
| C | 4.41365100  | -0.24466100 | -0.23600500 |
| C | 4.94323700  | 0.23016800  | -1.44264000 |
| C | 5.14693000  | -1.18011100 | 0.49849700  |
| C | 6.17359400  | -0.22071600 | -1.90501300 |
| H | 4.38292500  | 0.95395600  | -2.02372500 |
| C | 6.38222400  | -1.63154100 | 0.03436400  |
| H | 4.73432300  | -1.60557300 | 1.40431400  |
| C | 6.89991100  | -1.15423300 | -1.16597900 |
| H | 6.56707200  | 0.15717800  | -2.84318300 |
| H | 6.93349100  | -2.36646900 | 0.61220400  |
| H | 7.86026800  | -1.50841100 | -1.52691700 |
| C | 0.29890100  | -2.17196200 | 2.45418200  |
| C | 0.22365700  | -2.89967200 | 3.63676100  |
| C | 1.28352200  | -2.46105800 | 1.50438200  |
| C | 1.14681400  | -3.90650000 | 3.89814400  |
| H | 0.55973200  | -2.66293900 | 4.34767600  |
| C | 2.22421200  | -3.45566000 | 1.77651300  |
| C | 2.14969900  | -4.17127000 | 2.96758200  |
| H | -1.08737800 | -4.47264400 | 4.82072900  |
| H | -3.00109700 | -3.66598000 | 1.05248000  |
| H | -2.88231000 | -4.94705200 | 3.16480000  |
| O | -1.24199000 | -1.75557400 | 0.33293800  |
| C | -2.44331700 | -1.59224800 | -0.35521200 |
| C | -3.32755100 | -0.61536600 | 0.08639800  |
| C | -2.70711300 | -2.38200300 | -1.46223700 |
| C | -4.54015700 | -0.41174600 | -0.57508600 |
| H | -3.02360000 | -0.02793800 | 0.94264700  |
| C | -3.91393200 | -2.18326200 | -2.13109000 |
| H | -1.97717900 | -3.11483800 | -1.78372900 |
| C | -4.81694700 | -1.22228300 | -1.68795700 |
| H | -4.15246800 | -2.78685500 | -3.00127900 |
| H | -5.75232400 | -1.10332700 | -2.22330100 |
| H | 1.71947000  | 1.65504400  | 2.84329600  |
| H | 3.49010400  | 0.12024700  | 2.35307800  |
| C | -5.56688800 | 0.62447800  | -0.09210200 |
| C | -6.78531000 | -0.12701100 | 0.48876100  |
| H | -7.54021500 | 0.58108300  | 0.84497800  |
| H | -7.25449200 | -0.76942900 | -0.26081400 |
| H | -6.48879900 | -0.75911000 | 1.33012200  |
| C | -6.03231500 | 1.51120400  | -1.26676600 |
| H | -6.51295400 | 0.93288300  | -2.05848900 |
| H | -6.75898900 | 2.25068900  | -0.91762700 |
| H | -5.18961300 | 2.04604700  | -1.70767200 |
| C | -4.98918500 | 1.54329700  | 0.99887400  |
| H | -4.72967500 | 0.99214000  | 1.90591200  |
| H | -4.09213000 | 2.06306400  | 0.65365700  |
| H | -5.72974200 | 2.29750300  | 1.27816000  |

## B1/RC

B3LYP/6-311+G(d,p), C1

| Atom | Cartesian (Hartree/Bohr) |          |          |
|------|--------------------------|----------|----------|
|      | X                        | Y        | Z        |
| C    | -0.61697                 | -0.60871 | -1.69307 |
| C    | 0.11698                  | 0.68833  | -1.26323 |
| C    | 1.1016                   | 0.2518   | -0.18648 |
| C    | 0.00131                  | -1.71651 | -0.84898 |
| N    | 0.96722                  | -1.13211 | -0.01624 |
| O    | 1.87709                  | 0.94856  | 0.41929  |
| O    | -0.25841                 | -2.89238 | -0.88015 |
| C    | -2.14396                 | -0.31913 | -1.45101 |
| C    | -1.01722                 | 1.67383  | -0.79969 |
| C    | -2.09922                 | 1.19881  | -1.82363 |
| O    | -2.70899                 | 1.81071  | -2.64246 |
| C    | -4.30778                 | -2.91429 | 1.6077   |
| C    | -3.61897                 | -2.1712  | 0.674    |
| C    | -3.0356                  | -0.92649 | 1.01096  |
| C    | -3.12732                 | -0.45914 | 2.35794  |
| C    | -3.85636                 | -1.24236 | 3.28185  |
| C    | -4.44039                 | -2.43786 | 2.91993  |
| C    | -2.33768                 | -0.1049  | 0.05793  |
| C    | -2.44262                 | 0.7652   | 2.75649  |
| C    | -1.67421                 | 1.50047  | 1.80275  |
| C    | -1.68704                 | 1.05178  | 0.4357   |
| C    | -0.93043                 | 2.6228   | 2.23811  |
| H    | -0.31235                 | 3.1568   | 1.53271  |
| C    | -0.97163                 | 3.0426   | 3.54965  |
| C    | -1.76208                 | 2.3526   | 4.47982  |
| C    | -2.47247                 | 1.23769  | 4.08833  |
| H    | -4.74381                 | -3.86649 | 1.3243   |
| H    | -3.51732                 | -2.55081 | -0.3312  |
| H    | -3.95931                 | -0.91257 | 4.3074   |
| H    | -4.9909                  | -3.01383 | 3.65691  |
| H    | -0.39003                 | 3.90482  | 3.85877  |
| H    | -1.8061                  | 2.6849   | 5.51209  |
| H    | -3.05632                 | 0.71503  | 4.83472  |
| C    | -0.71708                 | 3.15222  | -0.85758 |
| C    | -1.77973                 | 4.06612  | -0.835   |
| C    | 0.58704                  | 3.64928  | -0.95643 |
| C    | -1.5447                  | 5.43462  | -0.90907 |
| H    | -2.79917                 | 3.70623  | -0.76124 |
| C    | 0.82159                  | 5.02178  | -1.03156 |
| H    | 1.43069                  | 2.97095  | -0.92461 |
| C    | -0.24163                 | 5.91921  | -1.01058 |
| H    | -2.38271                 | 6.12409  | -0.89147 |
| H    | 1.84187                  | 5.38563  | -1.10035 |

|   |          |          |          |
|---|----------|----------|----------|
| H | -0.05843 | 6.98736  | -1.06978 |
| C | -3.13852 | -1.1226  | -2.25368 |
| C | -4.45608 | -0.65803 | -2.36897 |
| C | -2.79013 | -2.30828 | -2.9097  |
| C | -5.39551 | -1.35768 | -3.11823 |
| H | -4.75007 | 0.25864  | -1.87135 |
| C | -3.73302 | -3.00883 | -3.66122 |
| H | -1.79456 | -2.71945 | -2.79687 |
| C | -5.03715 | -2.53618 | -3.77071 |
| H | -6.40951 | -0.97854 | -3.19565 |
| H | -3.44303 | -3.93059 | -4.15545 |
| H | -5.77007 | -3.0814  | -4.35684 |
| C | 1.79302  | -1.88047 | 0.87756  |
| C | 1.24787  | -2.48594 | 2.00528  |
| C | 3.16244  | -1.99362 | 0.60742  |
| C | 2.06575  | -3.19129 | 2.88188  |
| H | 0.18444  | -2.39052 | 2.19091  |
| C | 3.98397  | -2.68836 | 1.4941   |
| C | 3.43207  | -3.2828  | 2.62502  |
| H | 1.639    | -3.66093 | 3.76088  |
| H | 5.04446  | -2.76847 | 1.28741  |
| H | 4.07788  | -3.82748 | 3.30598  |
| O | 3.6129   | -1.4527  | -0.5702  |
| C | 4.90001  | -0.92641 | -0.62973 |
| C | 5.77943  | -1.43833 | -1.57367 |
| C | 5.27095  | 0.14359  | 0.18271  |
| C | 7.04887  | -0.87443 | -1.70212 |
| H | 5.46339  | -2.26347 | -2.20234 |
| C | 6.54281  | 0.68669  | 0.04576  |
| H | 4.55617  | 0.55095  | 0.88836  |
| C | 7.45558  | 0.18951  | -0.8945  |
| H | 6.82757  | 1.52434  | 0.67656  |
| H | 0.67747  | 1.13794  | -2.08591 |
| H | -0.4561  | -0.84595 | -2.74705 |
| H | 7.73223  | -1.27684 | -2.44415 |
| C | 8.83358  | 0.79287  | -1.02241 |
| H | 9.38437  | 0.36123  | -1.86066 |
| H | 8.78464  | 1.87447  | -1.18018 |
| H | 9.42814  | 0.62755  | -0.11801 |

**B1/RC**

B3LYP+D3/6-311+G(d,p), C1

| Atom | Cartesian (Hartree/Bohr) |             |             |
|------|--------------------------|-------------|-------------|
|      | X                        | Y           | Z           |
| C    | 0.69754900               | 1.07095400  | -0.77181100 |
| C    | -0.37717500              | -0.27730300 | -1.46330100 |
| C    | -0.86744900              | -1.34637500 | -0.49920300 |
| C    | -1.34728500              | 0.70163800  | 0.54864900  |
| N    | -1.36672900              | -0.69599600 | 0.63763000  |
| O    | -0.84393700              | -2.54009100 | -0.65298500 |
| O    | -1.76888100              | 1.45181400  | 1.39176500  |
| C    | 0.69288400               | 1.78002100  | -0.59486400 |
| C    | 1.18371300               | -0.27682600 | -1.66298800 |
| C    | 1.35025700               | 1.25436600  | -1.90583200 |
| O    | 1.83785000               | 1.84583400  | -2.81654000 |
| C    | 1.64906700               | 2.44457200  | 3.79539700  |
| C    | 1.37620200               | 2.27997100  | 2.45569500  |
| C    | 1.78512500               | 1.11680600  | 1.76160800  |
| C    | 2.47092900               | 0.08515900  | 2.47331100  |
| C    | 2.74047400               | 0.29669200  | 3.84531500  |
| C    | 2.34497500               | 1.44721400  | 4.49455300  |
| C    | 1.49407300               | 0.89625200  | 0.37239800  |
| C    | 2.81966200               | -1.16118800 | 1.80183300  |
| C    | 2.43876500               | -1.37427000 | 0.44140200  |
| C    | 1.78866400               | -0.29671700 | -0.25153800 |
| C    | 2.69178100               | -2.63152500 | -0.15579000 |
| H    | 2.37083800               | -2.81312000 | -1.16894500 |
| C    | 3.33431500               | -3.63386400 | 0.53623800  |
| C    | 3.75070600               | -3.41531000 | 1.85745900  |
| C    | 3.49148800               | -2.20870300 | 2.47202100  |
| H    | 1.31793200               | 3.34216400  | 4.30686000  |
| H    | 0.82685900               | 3.04582000  | 1.93168600  |
| H    | 3.25758500               | -0.46171600 | 4.41836200  |
| H    | 2.56441200               | 1.57271400  | 5.55001600  |
| H    | 3.51453000               | -4.59014300 | 0.05663200  |
| H    | 4.26725000               | -4.19821200 | 2.40342200  |
| H    | 3.81443600               | -2.07694800 | 3.49647700  |
| C    | 1.74367700               | -1.15131900 | -2.75094100 |
| C    | 3.04844700               | -0.91604700 | -3.20239500 |
| C    | 1.01323000               | -2.19847200 | -3.32071900 |
| C    | 3.60909100               | -1.70909400 | -4.19720700 |
| H    | 3.62758700               | -0.10876400 | -2.76984000 |
| C    | 1.57629300               | -2.99295100 | -4.31839800 |
| H    | 0.02631600               | -2.43778600 | -2.94530600 |
| C    | 2.87381300               | -2.75111700 | -4.76117700 |
| H    | 4.62189100               | -1.51240000 | -4.53383900 |
| H    | 0.99891800               | -3.80902800 | -4.74097800 |

|   |             |             |             |
|---|-------------|-------------|-------------|
| H | 3.31171300  | -3.37115200 | -5.53686100 |
| C | 0.70164900  | 3.27597700  | -0.44431900 |
| C | 1.91306100  | 3.96032400  | -0.60301300 |
| C | 0.45099200  | 4.00868900  | -0.14589600 |
| C | 1.97132000  | 5.34239900  | -0.46495600 |
| H | 2.81511500  | 3.40481900  | -0.83237700 |
| C | 0.39188200  | 5.39482300  | -0.00847200 |
| H | -1.38561600 | 3.49604500  | 0.04324200  |
| C | 0.81698500  | 6.06633400  | -0.16834900 |
| H | 2.91920000  | 5.85573500  | -0.59043600 |
| H | -1.29421700 | 5.94683800  | 0.23464300  |
| H | 0.86194200  | 7.14521700  | -0.05932900 |
| C | 1.89597100  | -1.38534200 | 1.76734100  |
| C | 1.22376000  | -1.29727300 | 2.98434600  |
| C | 3.07518700  | -2.13702600 | 1.66606100  |
| C | 1.70562700  | -1.96888900 | 4.10134200  |
| H | -0.31726100 | -0.70419800 | 3.03453300  |
| C | 3.54642900  | -2.81916700 | 2.78621600  |
| C | 2.86363400  | -2.73854200 | 3.99496500  |
| H | -1.17471500 | -1.89872200 | 5.04393600  |
| H | -4.45186300 | -3.40550200 | 2.68172500  |
| H | -3.24405000 | -3.27356100 | 4.85873400  |
| O | -3.77494500 | -2.30326500 | 0.49468100  |
| C | -4.00892800 | -1.22352700 | -0.34104100 |
| C | -4.39004200 | 0.02429100  | 0.14316300  |
| C | -3.85531500 | -1.43338700 | -1.70822400 |
| C | -4.57457300 | 1.07398300  | -0.75204400 |
| H | -4.48454800 | 0.18629100  | 1.21028200  |
| C | -4.05631300 | -0.37505600 | -2.58980000 |
| H | -3.54603900 | -2.41272100 | -2.05345200 |
| C | -4.40685600 | 0.89970900  | -2.12981900 |
| H | -3.92285800 | -0.54233000 | -3.65481500 |
| H | -0.88848500 | -0.38961700 | -2.41968100 |
| H | -1.38231100 | 1.68982300  | -1.35279300 |
| H | -4.84234400 | 2.05184700  | -0.36313700 |
| C | -4.62661300 | 2.04363100  | -3.08973800 |
| H | -4.34170000 | 3.00110300  | -2.64616000 |
| H | -4.04811200 | 1.91643800  | -4.00800200 |
| H | -5.68037900 | 2.12161500  | -3.37825900 |



**B1/TS**

B3LYP/6-311+G(d,p), C1

---

| Atom | Cartesian (Hartree/Bohr) |          |          |
|------|--------------------------|----------|----------|
|      | X                        | Y        | Z        |
| C    | -1.54741                 | -0.66652 | -1.72461 |
| C    | -0.42253                 | 0.37622  | -1.77356 |
| C    | 0.78247                  | -0.31532 | -1.16433 |
| C    | -0.90414                 | -1.92378 | -1.16651 |
| N    | 0.4861                   | -1.70419 | -0.93136 |
| O    | 1.7768                   | 0.25417  | -0.81328 |
| O    | -1.51593                 | -2.94819 | -0.98394 |
| C    | -2.69396                 | -0.0077  | -0.8736  |
| C    | -0.95846                 | 1.61783  | -0.96967 |
| C    | -2.46009                 | 1.45723  | -1.37134 |
| O    | -3.20708                 | 2.22095  | -1.8961  |
| C    | -3.81943                 | -2.03776 | 3.0429   |
| C    | -3.4597                  | -1.4736  | 1.83848  |
| C    | -2.51895                 | -0.41876 | 1.77457  |
| C    | -1.90072                 | 0.03595  | 2.97885  |
| C    | -2.30756                 | -0.5578  | 4.19528  |
| C    | -3.24841                 | -1.56527 | 4.23332  |
| C    | -2.14131                 | 0.21734  | 0.54107  |
| C    | -0.85047                 | 1.04657  | 2.9258   |
| C    | -0.42713                 | 1.57692  | 1.66869  |
| C    | -1.13988                 | 1.16528  | 0.48861  |
| C    | 0.66897                  | 2.47042  | 1.63285  |
| H    | 1.02561                  | 2.83476  | 0.68199  |
| C    | 1.3001                   | 2.87337  | 2.78935  |
| C    | 0.85691                  | 2.39434  | 4.03053  |
| C    | -0.18796                 | 1.49661  | 4.09039  |
| H    | -4.54102                 | -2.84773 | 3.06585  |
| H    | -3.89846                 | -1.84912 | 0.92646  |
| H    | -1.86848                 | -0.23247 | 5.12935  |
| H    | -3.53363                 | -2.0005  | 5.18578  |
| H    | 2.14102                  | 3.55677  | 2.7348   |
| H    | 1.3438                   | 2.71636  | 4.9456   |
| H    | -0.49142                 | 1.12827  | 5.06169  |
| C    | -0.37654                 | 2.97147  | -1.29767 |
| C    | -1.06948                 | 4.1236   | -0.90021 |
| C    | 0.81827                  | 3.1261   | -2.00839 |
| C    | -0.58255                 | 5.38975  | -1.20509 |
| H    | -1.99742                 | 4.03036  | -0.34845 |
| C    | 1.3051                   | 4.39598  | -2.31586 |
| H    | 1.40396                  | 2.25761  | -2.28177 |
| C    | 0.60674                  | 5.53184  | -1.91803 |
| H    | -1.13616                 | 6.26768  | -0.8878  |
| H    | 2.23849                  | 4.49221  | -2.86131 |

|   |          |          |          |
|---|----------|----------|----------|
| H | 0.98633  | 6.52007  | -2.15742 |
| C | -4.10543 | -0.50009 | -1.08501 |
| C | -5.17123 | 0.28638  | -0.62489 |
| C | -4.40041 | -1.69284 | -1.75332 |
| C | -6.48887 | -0.10876 | -0.82542 |
| H | -4.97009 | 1.21646  | -0.10614 |
| C | -5.72254 | -2.08786 | -1.95581 |
| H | -3.60035 | -2.34627 | -2.07705 |
| C | -6.77124 | -1.29821 | -1.49535 |
| H | -7.29734 | 0.51678  | -0.46077 |
| H | -5.92739 | -3.02109 | -2.47083 |
| H | -7.79985 | -1.60627 | -1.6535  |
| C | 1.44341  | -2.8048  | -0.90899 |
| C | 0.95973  | -4.10031 | -0.63147 |
| C | 2.8526   | -2.64694 | -0.87548 |
| C | 1.80003  | -5.17456 | -0.37463 |
| H | -0.10162 | -4.26153 | -0.58698 |
| C | 3.68461  | -3.7322  | -0.58708 |
| C | 3.17594  | -4.99201 | -0.32296 |
| H | 1.36102  | -6.14724 | -0.18093 |
| H | 4.75439  | -3.56115 | -0.61468 |
| H | 3.84569  | -5.81704 | -0.10489 |
| O | 3.44543  | -1.51379 | -1.37966 |
| C | 4.51308  | -0.9277  | -0.72708 |
| C | 5.51086  | -0.37337 | -1.52287 |
| C | 4.58287  | -0.81948 | 0.65986  |
| C | 6.58262  | 0.28417  | -0.92562 |
| H | 5.43124  | -0.45639 | -2.60119 |
| C | 5.66605  | -0.16643 | 1.23929  |
| H | 3.78938  | -1.2249  | 1.27628  |
| C | 6.68648  | 0.39474  | 0.46399  |
| H | 5.70793  | -0.08098 | 2.32164  |
| H | -0.17297 | 0.67374  | -2.79541 |
| H | -1.93318 | -0.91675 | -2.71632 |
| H | 7.35417  | 0.71583  | -1.55707 |
| C | 7.86878  | 1.07692  | 1.10945  |
| H | 8.33224  | 1.80092  | 0.43505  |
| H | 7.57878  | 1.60909  | 2.0192   |
| H | 8.64336  | 0.35495  | 1.39173  |

---

**B1/TS**

B3LYP+D3/6-311+G(d,p), C1

---

| Atom | Cartesian (Hartree/Bohr) |          |          |
|------|--------------------------|----------|----------|
|      | X                        | Y        | Z        |
| C    | 0.67353                  | 0.83455  | -1.51407 |
| C    | -0.45671                 | -0.12028 | -1.09152 |
| C    | -1.07252                 | 0.54388  | 0.11496  |
| C    | 0.48847                  | 2.07266  | -0.65443 |
| N    | -0.70635                 | 1.93951  | 0.10839  |
| O    | -1.64949                 | -0.01756 | 0.99807  |
| O    | 1.23415                  | 3.02008  | -0.65153 |
| C    | 1.98169                  | 0.00203  | -1.33101 |
| C    | 0.22336                  | -1.49059 | -0.78333 |
| C    | 1.39269                  | -1.37318 | -1.81243 |
| O    | 1.74411                  | -2.10104 | -2.68479 |
| C    | 4.84823                  | 1.5446   | 1.82302  |
| C    | 3.95484                  | 1.13055  | 0.86056  |
| C    | 3.01856                  | 0.1068   | 1.12972  |
| C    | 2.96749                  | -0.47342 | 2.43244  |
| C    | 3.90996                  | -0.03207 | 3.38657  |
| C    | 4.83491                  | 0.94691  | 3.09167  |
| C    | 2.08625                  | -0.36908 | 0.15084  |
| C    | 1.93405                  | -1.44784 | 2.75851  |
| C    | 0.94919                  | -1.8044  | 1.78798  |
| C    | 1.08821                  | -1.26447 | 0.46709  |
| C    | -0.11354                 | -2.65702 | 2.16245  |
| H    | -0.88789                 | -2.88281 | 1.44784  |
| C    | -0.18318                 | -3.19048 | 3.42967  |
| C    | 0.80911                  | -2.88602 | 4.37237  |
| C    | 1.83617                  | -2.02815 | 4.04195  |
| H    | 5.55615                  | 2.33498  | 1.59834  |
| H    | 3.95945                  | 1.60315  | -0.10935 |
| H    | 3.90731                  | -0.45222 | 4.38341  |
| H    | 5.5415                   | 1.26534  | 3.85091  |
| H    | -1.00869                 | -3.84167 | 3.69611  |
| H    | 0.76311                  | -3.31174 | 5.36928  |
| H    | 2.57423                  | -1.79518 | 4.79773  |
| C    | -0.63861                 | -2.71172 | -0.9096  |
| C    | -0.03376                 | -3.96891 | -1.01096 |
| C    | -2.03415                 | -2.63345 | -0.91093 |
| C    | -0.80593                 | -5.12085 | -1.10667 |
| H    | 1.04657                  | -4.04538 | -1.00789 |
| C    | -2.80699                 | -3.78811 | -1.00536 |
| H    | -2.53468                 | -1.6826  | -0.78666 |
| C    | -2.19699                 | -5.03535 | -1.10374 |
| H    | -0.32016                 | -6.0879  | -1.18262 |
| H    | -3.88852                 | -3.70594 | -0.98762 |

|   |          |          |          |
|---|----------|----------|----------|
| H | -2.79928 | -5.93501 | -1.17477 |
| C | 3.21149  | 0.43308  | -2.07421 |
| C | 4.29523  | -0.45078 | -2.13343 |
| C | 3.3176   | 1.67039  | -2.71131 |
| C | 5.45858  | -0.10294 | -2.8072  |
| H | 4.22769  | -1.41304 | -1.63953 |
| C | 4.48467  | 2.01893  | -3.38898 |
| H | 2.5142   | 2.39096  | -2.63452 |
| C | 5.55774  | 1.1354   | -3.4398  |
| H | 6.28964  | -0.79948 | -2.83965 |
| H | 4.5542   | 2.98922  | -3.8695  |
| H | 6.46686  | 1.40895  | -3.9649  |
| C | -1.5491  | 3.06421  | 0.43469  |
| C | -1.09955 | 4.35733  | 0.11188  |
| C | -2.76331 | 2.98166  | 1.15751  |
| C | -1.80933 | 5.49766  | 0.4615   |
| H | -0.15457 | 4.47548  | -0.38786 |
| C | -3.45587 | 4.13681  | 1.51262  |
| C | -2.98876 | 5.39989  | 1.18764  |
| H | -1.41062 | 6.46627  | 0.18134  |
| H | -4.38937 | 3.99667  | 2.04465  |
| H | -3.54228 | 6.28383  | 1.48322  |
| O | -3.40328 | 1.80741  | 1.49041  |
| C | -4.05214 | 1.10194  | 0.50119  |
| C | -4.09332 | 1.48861  | -0.83511 |
| C | -4.64465 | -0.09577 | 0.89855  |
| C | -4.70267 | 0.64957  | -1.77067 |
| H | -3.66088 | 2.42947  | -1.15149 |
| C | -5.24992 | -0.9109  | -0.04498 |
| H | -4.58361 | -0.38301 | 1.94092  |
| C | -5.27869 | -0.56501 | -1.40286 |
| H | -5.69724 | -1.84643 | 0.27769  |
| H | -1.22332 | -0.22278 | -1.8631  |
| H | 0.58749  | 1.15263  | -2.55649 |
| H | -4.72505 | 0.95823  | -2.81176 |
| C | -5.87884 | -1.49245 | -2.42877 |
| H | -6.21884 | -0.94811 | -3.31257 |
| H | -5.14901 | -2.2364  | -2.76683 |
| H | -6.73488 | -2.03829 | -2.02453 |

---

**B1/PD**

B3LYP/6-311+G(d,p), C1

---

| Atom | Cartesian (Hartree/Bohr) |          |          |
|------|--------------------------|----------|----------|
|      | X                        | Y        | Z        |
| C    | -2.11096                 | -0.56019 | -1.63075 |
| C    | -1.17985                 | 0.61386  | -2.02976 |
| C    | 0.19827                  | -0.01473 | -2.21155 |
| C    | -1.21388                 | -1.79047 | -1.59493 |
| N    | 0.08154                  | -1.38961 | -1.95698 |
| O    | 1.21003                  | 0.53467  | -2.56939 |
| O    | -1.53956                 | -2.92461 | -1.35078 |
| C    | -2.77218                 | -0.12334 | -0.2768  |
| C    | -1.35411                 | 1.68823  | -0.89321 |
| C    | -2.86758                 | 1.40238  | -0.61195 |
| O    | -3.8099                  | 2.12909  | -0.639   |
| C    | -1.89206                 | -2.65729 | 3.40286  |
| C    | -2.1396                  | -1.94207 | 2.25148  |
| C    | -1.41271                 | -0.76712 | 1.94748  |
| C    | -0.37745                 | -0.34083 | 2.83333  |
| C    | -0.16306                 | -1.09346 | 4.01025  |
| C    | -0.90368                 | -2.22101 | 4.29679  |
| C    | -1.65695                 | 0.01979  | 0.76878  |
| C    | 0.45234                  | 0.80781  | 2.4903   |
| C    | 0.2658                   | 1.48024  | 1.24426  |
| C    | -0.84301                 | 1.07796  | 0.42095  |
| C    | 1.16165                  | 2.51277  | 0.88092  |
| H    | 1.05747                  | 2.99278  | -0.07998 |
| C    | 2.16945                  | 2.91673  | 1.72918  |
| C    | 2.31824                  | 2.30117  | 2.97968  |
| C    | 1.48246                  | 1.26609  | 3.34188  |
| H    | -2.45918                 | -3.55853 | 3.61115  |
| H    | -2.89345                 | -2.29324 | 1.56299  |
| H    | 0.61074                  | -0.79836 | 4.70706  |
| H    | -0.70835                 | -2.77729 | 5.20812  |
| H    | 2.84469                  | 3.70991  | 1.42597  |
| H    | 3.10084                  | 2.62517  | 3.65813  |
| H    | 1.63476                  | 0.79851  | 4.30603  |
| C    | -1.05218                 | 3.12312  | -1.25451 |
| C    | -1.57712                 | 4.15426  | -0.46301 |
| C    | -0.27764                 | 3.46632  | -2.36815 |
| C    | -1.33596                 | 5.48714  | -0.77767 |
| H    | -2.17937                 | 3.91465  | 0.40504  |
| C    | -0.03669                 | 4.80336  | -2.68262 |
| H    | 0.18493                  | 2.69125  | -2.96677 |
| C    | -0.56632                 | 5.8183   | -1.89173 |
| H    | -1.75395                 | 6.26938  | -0.1521  |
| H    | 0.57337                  | 5.04667  | -3.54681 |

|   |          |          |          |
|---|----------|----------|----------|
| H | -0.37975 | 6.85884  | -2.13786 |
| C | -4.09325 | -0.75683 | 0.08823  |
| C | -4.89567 | -0.1451  | 1.06124  |
| C | -4.56426 | -1.92133 | -0.5277  |
| C | -6.13131 | -0.68116 | 1.40618  |
| H | -4.55294 | 0.75816  | 1.55222  |
| C | -5.80378 | -2.45815 | -0.1813  |
| H | -3.94425 | -2.44503 | -1.24468 |
| C | -6.59282 | -1.84    | 0.78376  |
| H | -6.73702 | -0.18984 | 2.16093  |
| H | -6.1459  | -3.36697 | -0.66614 |
| H | -7.55786 | -2.25785 | 1.05229  |
| C | 1.15466  | -2.31445 | -2.1537  |
| C | 1.04978  | -3.28853 | -3.14364 |
| C | 2.3078   | -2.24006 | -1.3614  |
| C | 2.09055  | -4.18206 | -3.3681  |
| H | 0.14523  | -3.33659 | -3.7388  |
| C | 3.35898  | -3.12805 | -1.59925 |
| C | 3.24595  | -4.09174 | -2.59571 |
| H | 2.00063  | -4.93705 | -4.14092 |
| H | 4.25488  | -3.06496 | -0.99435 |
| H | 4.06844  | -4.77942 | -2.76328 |
| O | 2.32005  | -1.31234 | -0.35686 |
| C | 3.54941  | -0.83644 | 0.09397  |
| C | 4.29532  | 0.02796  | -0.7032  |
| C | 3.98602  | -1.19007 | 1.36241  |
| C | 5.49827  | 0.52716  | -0.21769 |
| H | 3.91471  | 0.31064  | -1.67817 |
| C | 5.19349  | -0.67598 | 1.83504  |
| H | 3.37814  | -1.85156 | 1.96932  |
| C | 5.97198  | 0.18205  | 1.05522  |
| H | 5.53199  | -0.9518  | 2.82956  |
| H | -1.47039 | 1.06085  | -2.98366 |
| H | -2.89502 | -0.73304 | -2.37249 |
| H | 6.077    | 1.20599  | -0.83804 |
| C | 7.29003  | 0.72079  | 1.55756  |
| H | 7.36674  | 1.80121  | 1.40526  |
| H | 7.4236   | 0.52577  | 2.62377  |
| H | 8.135    | 0.26249  | 1.03263  |

---

## B1/PD

B3LYP+D3/6-311+G(d,p), C1

| Atom | Cartesian (Hartree/Bohr) |             |             |
|------|--------------------------|-------------|-------------|
|      | X                        | Y           | Z           |
| C    | 2.34631600               | -0.49192700 | 1.53152700  |
| C    | 1.64242500               | 0.84176500  | 1.88944400  |
| C    | 0.24199500               | 0.44134400  | 2.33595300  |
| C    | 1.35122000               | -1.58241100 | 1.89086400  |
| N    | 0.18605400               | -0.95855500 | 2.35208200  |
| O    | -0.66431200              | 1.17238000  | 2.64549900  |
| O    | 1.51111600               | -2.77440100 | 1.81595300  |
| C    | 2.67735200               | -0.36759500 | 0.00504400  |
| C    | 1.69728600               | 1.71406900  | 0.58592700  |
| C    | 3.04436000               | 1.15304100  | 0.02410000  |
| O    | 4.04183900               | 1.71042100  | -0.30782800 |
| C    | 0.51260800               | -3.30073600 | -2.70830900 |
| C    | 1.15382500               | -2.45127700 | -1.83326100 |
| C    | 0.70958800               | -1.12176700 | -1.64946100 |
| C    | -0.44651100              | -0.66548700 | -2.35099000 |
| C    | -1.06385100              | -1.55968700 | -3.25412000 |
| C    | -0.59655700              | -2.84506100 | -3.43666500 |
| C    | 1.35630600               | -0.20334800 | -0.75693100 |
| C    | -0.99473400              | 0.65644300  | -2.07645900 |
| C    | -0.41525800              | 1.47479000  | -1.05991500 |
| C    | 0.80286700               | 1.02018300  | -0.45065500 |
| C    | -1.04986900              | 2.68817900  | -0.70707200 |
| H    | -0.64744300              | 3.28372100  | 0.09683400  |
| C    | -2.17844400              | 3.11979300  | -1.36813600 |
| C    | -2.71620500              | 2.34988500  | -2.40923000 |
| C    | -2.13966500              | 1.14431000  | -2.74435800 |
| H    | 0.86524700               | -4.31973000 | -2.82820600 |
| H    | 1.99802900               | -2.81244600 | -1.26545800 |
| H    | -1.94168900              | -1.24984400 | -3.80545200 |
| H    | -1.09998100              | -3.50733000 | -4.13397900 |
| H    | -2.64945800              | 4.05329600  | -1.07805300 |
| H    | -3.60238500              | 2.68768900  | -2.93644100 |
| H    | -2.60024500              | 0.55720100  | -3.52688200 |
| C    | 1.65194800               | 3.20794500  | 0.75519300  |
| C    | 2.09729700               | 4.02537500  | -0.29135800 |
| C    | 1.15989900               | 3.81213700  | 1.91640000  |
| C    | 2.05266100               | 5.41049100  | -0.17858400 |
| H    | 2.47817500               | 3.57438800  | -1.19943500 |
| C    | 1.11552000               | 5.20095000  | 2.02843400  |
| H    | 0.75110900               | 3.20349000  | 2.71332000  |
| C    | 1.56292300               | 6.00492800  | 0.98363900  |
| H    | 2.40175000               | 6.02723800  | -1.00049800 |
| H    | 0.72035500               | 5.65173100  | 2.93322500  |

|   |             |             |             |
|---|-------------|-------------|-------------|
| H | 1.52709000  | 7.08614000  | 1.07121000  |
| C | 3.75077600  | -1.25708100 | -0.56034900 |
| C | 4.27363400  | -0.95137300 | -1.82329400 |
| C | 4.24449900  | -2.37387900 | 0.11941500  |
| C | 5.26329700  | -1.74320700 | -2.39331800 |
| H | 3.89804800  | -0.08926500 | -2.36256600 |
| C | 5.23788900  | -3.16774800 | -0.45301800 |
| H | 3.81628100  | -2.66488600 | 1.06999500  |
| C | 5.75120500  | -2.85580700 | -1.70845600 |
| H | 5.65542600  | -1.49120000 | -3.37336800 |
| H | 5.60183500  | -4.03767200 | 0.08430800  |
| H | 6.52316600  | -3.47559900 | -2.15333800 |
| C | -0.97504000 | -1.68399800 | 2.75292100  |
| C | -0.97926500 | -2.40116900 | 3.94281700  |
| C | -2.10819200 | -1.66410900 | 1.93190400  |
| C | -2.12071900 | -3.09058800 | 4.34048400  |
| H | -0.08221700 | -2.40891400 | 4.55161300  |
| C | -3.25979200 | -2.33862800 | 2.33849900  |
| C | -3.25774800 | -3.04700200 | 3.53729700  |
| H | -2.12253100 | -3.64989900 | 5.26909600  |
| H | -4.14386900 | -2.31162600 | 1.71459000  |
| H | -4.15722200 | -3.57269800 | 3.84068800  |
| O | -1.98996300 | -0.98687600 | 0.75130800  |
| C | -3.15136300 | -0.64790300 | 0.06469400  |
| C | -3.82974900 | 0.51307000  | 0.41074600  |
| C | -3.58380100 | -1.44934700 | -0.98213100 |
| C | -4.96091100 | 0.87336000  | -0.31313100 |
| H | -3.44890300 | 1.12182000  | 1.22241800  |
| C | -4.71568000 | -1.07083400 | -1.70032500 |
| H | -3.02124300 | -2.33979300 | -1.23553900 |
| C | -5.42079000 | 0.09299200  | -1.37973900 |
| H | -5.05131800 | -1.69229600 | -2.52574000 |
| H | 2.13823500  | 1.36466400  | 2.70989200  |
| H | 3.26942700  | -0.64895500 | 2.09321800  |
| H | -5.48613700 | 1.78787000  | -0.05331800 |
| C | -6.61591300 | 0.52974200  | -2.19098000 |
| H | -7.39152900 | 0.97242900  | 1.56067200  |
| H | -6.33199200 | 1.28645400  | 2.93113800  |
| H | -7.06368400 | -0.30523200 | -2.73469100 |

**B2/RC**

B3LYP/6-311+G(d,p), C1

---

| Atom | Cartesian (Hartree/Bohr) |          |          |
|------|--------------------------|----------|----------|
|      | X                        | Y        | Z        |
| C    | 1.18279                  | 0.5579   | -1.70013 |
| C    | 0.41335                  | -0.68929 | -1.19119 |
| C    | -0.49785                 | -0.1716  | -0.08595 |
| C    | 0.65498                  | 1.72085  | -0.86888 |
| N    | -0.29158                 | 1.20901  | 0.0307   |
| O    | -1.27579                 | -0.8103  | 0.57775  |
| O    | 0.96195                  | 2.88235  | -0.95671 |
| C    | 2.70533                  | 0.20698  | -1.51579 |
| C    | 1.52371                  | -1.71033 | -0.74596 |
| C    | 2.57619                  | -1.31833 | -1.83382 |
| O    | 3.1184                   | -1.98319 | -2.65888 |
| C    | 5.10541                  | 2.80974  | 1.35396  |
| C    | 4.3497                   | 2.06328  | 0.47638  |
| C    | 3.72917                  | 0.85781  | 0.88275  |
| C    | 3.85672                  | 0.4355   | 2.2416   |
| C    | 4.65251                  | 1.22088  | 3.10676  |
| C    | 5.26985                  | 2.37671  | 2.67755  |
| C    | 2.95818                  | 0.03425  | -0.01044 |
| C    | 3.14197                  | -0.74546 | 2.71177  |
| C    | 2.30542                  | -1.48088 | 1.81737  |
| C    | 2.2763                   | -1.07921 | 0.436    |
| C    | 1.53841                  | -2.55738 | 2.32265  |
| H    | 0.87013                  | -3.08921 | 1.66303  |
| C    | 1.61989                  | -2.93445 | 3.6452   |
| C    | 2.47553                  | -2.24573 | 4.51674  |
| C    | 3.21056                  | -1.17364 | 4.0571   |
| H    | 5.56896                  | 3.73136  | 1.01795  |
| H    | 4.22404                  | 2.41017  | -0.53787 |
| H    | 4.7821                   | 0.92498  | 4.13958  |
| H    | 5.87195                  | 2.95561  | 3.37062  |
| H    | 1.01958                  | -3.76204 | 4.00841  |
| H    | 2.55147                  | -2.54495 | 5.55724  |
| H    | 3.84622                  | -0.65053 | 4.75956  |
| C    | 1.15609                  | -3.17446 | -0.74007 |
| C    | 2.17671                  | -4.1353  | -0.73799 |
| C    | -0.17226                 | -3.61357 | -0.75931 |
| C    | 1.87753                  | -5.49325 | -0.75372 |
| H    | 3.21346                  | -3.82032 | -0.7261  |
| C    | -0.47109                 | -4.97546 | -0.77608 |
| H    | -0.98263                 | -2.89663 | -0.71137 |
| C    | 0.55075                  | -5.91997 | -0.77543 |
| H    | 2.68382                  | -6.21976 | -0.75331 |
| H    | -1.50872                 | -5.29387 | -0.78349 |

|   |           |          |          |
|---|-----------|----------|----------|
| H | 0.31727   | -6.97984 | -0.78935 |
| C | 3.69692   | 0.93785  | -2.38849 |
| C | 4.98667   | 0.41093  | -2.54274 |
| C | 3.37157   | 2.11455  | -3.07173 |
| C | 5.92175   | 1.04142  | -3.35604 |
| H | 5.26203   | -0.50027 | -2.02474 |
| C | 4.30997   | 2.74577  | -3.88756 |
| H | 2.4007    | 2.57369  | -2.93192 |
| C | 5.58638   | 2.21176  | -4.03502 |
| H | 6.91399   | 0.61473  | -3.46264 |
| H | 4.03872   | 3.66214  | -4.40208 |
| H | 6.31572   | 2.70323  | -4.67103 |
| C | -1.03852  | 2.02374  | 0.93587  |
| C | -0.41352  | 2.63771  | 2.0164   |
| C | -2.41253  | 2.19302  | 0.72513  |
| C | -1.15579  | 3.40807  | 2.90562  |
| H | 0.65208   | 2.49798  | 2.15578  |
| C | -3.15856  | 2.95336  | 1.62455  |
| C | -2.52712  | 3.55589  | 2.70871  |
| H | -0.66675  | 3.88419  | 3.74791  |
| H | -4.22285  | 3.0772   | 1.46395  |
| H | -3.1145   | 4.15133  | 3.40002  |
| O | -2.9411   | 1.63722  | -0.41212 |
| C | -4.25661  | 1.18468  | -0.40254 |
| C | -5.14479  | 1.71081  | -1.32755 |
| C | -4.6578   | 0.16743  | 0.46058  |
| C | -6.4495   | 1.21797  | -1.38811 |
| H | -4.81163  | 2.49519  | -1.99836 |
| C | -5.96253  | -0.30409 | 0.39029  |
| H | -3.94298  | -0.25721 | 1.15607  |
| C | -6.89268  | 0.20593  | -0.53115 |
| H | -6.253    | -1.09939 | 1.06857  |
| H | -0.20568  | -1.13998 | -1.97011 |
| H | 0.98433   | 0.76659  | -2.75372 |
| H | -7.11981  | 1.64745  | -2.12211 |
| C | -8.32427  | -0.35689 | -0.57114 |
| C | -9.19411  | 0.33427  | -1.63577 |
| H | -9.2946   | 1.40722  | -1.45016 |
| H | -8.79316  | 0.19921  | -2.64401 |
| H | -10.20022 | -0.09333 | -1.62618 |
| C | -8.27536  | -1.86669 | -0.89786 |
| H | -7.7092   | -2.42864 | -0.1515  |
| H | -9.28619  | -2.28523 | -0.92945 |
| H | -7.80721  | -2.04295 | -1.87014 |
| C | -8.99832  | -0.15386 | 0.80472  |
| H | -10.0185  | -0.54973 | 0.79354  |
| H | -8.45656  | -0.6628  | 1.60527  |
| H | -9.0517   | 0.90723  | 1.06341  |

---

## B2/RC

B3LYP+D3/6-311+G(d,p), C1

---

| Atom | Cartesian (Hartree/Bohr) |          |          |
|------|--------------------------|----------|----------|
|      | X                        | Y        | Z        |
| C    | -0.90655                 | 0.55456  | 0.10413  |
| C    | -0.39117                 | 0.0562   | -1.26725 |
| C    | 0.03357                  | -1.38349 | -1.03555 |
| C    | -0.69546                 | -0.60406 | 1.05814  |
| N    | -0.15913                 | -1.66677 | 0.32163  |
| O    | 0.45476                  | -2.16747 | -1.84639 |
| O    | -0.93352                 | -0.63646 | 2.23826  |
| C    | -0.03059                 | 1.80662  | 0.44802  |
| C    | 0.78935                  | 1.02517  | -1.62885 |
| C    | 0.16695                  | 2.31775  | -1.01212 |
| O    | -0.08862                 | 3.36886  | -1.50756 |
| C    | 2.33501                  | 1.24907  | 4.28587  |
| C    | 1.60725                  | 1.45283  | 3.13546  |
| C    | 2.11887                  | 1.0787   | 1.87179  |
| C    | 3.39816                  | 0.44852  | 1.79469  |
| C    | 4.11788                  | 0.267    | 2.99667  |
| C    | 3.60573                  | 0.66004  | 4.21446  |
| C    | 1.3902                   | 1.26538  | 0.65094  |
| C    | 3.90353                  | -0.03025 | 0.51531  |
| C    | 3.11675                  | 0.1149   | -0.66739 |
| C    | 1.86408                  | 0.80462  | -0.55771 |
| C    | 3.58115                  | -0.44538 | -1.87939 |
| H    | 2.97204                  | -0.37268 | -2.76596 |
| C    | 4.79447                  | -1.09246 | -1.94435 |
| C    | 5.59027                  | -1.20371 | -0.79526 |
| C    | 5.14784                  | -0.6888  | 0.40412  |
| H    | 1.92014                  | 1.53965  | 5.24483  |
| H    | 0.62556                  | 1.89359  | 3.20087  |
| H    | 5.09399                  | -0.19891 | 2.97698  |
| H    | 4.18493                  | 0.50217  | 5.11817  |
| H    | 5.12864                  | -1.51789 | -2.88429 |
| H    | 6.55056                  | -1.7062  | -0.84393 |
| H    | 5.77763                  | -0.80565 | 1.27583  |
| C    | 1.17611                  | 1.14221  | -3.07351 |
| C    | 1.9885                   | 2.21159  | -3.46656 |
| C    | 0.75922                  | 0.22166  | -4.03721 |
| C    | 2.37863                  | 2.35465  | -4.79219 |
| H    | 2.32129                  | 2.93089  | -2.72764 |
| C    | 1.151                    | 0.36567  | -5.36673 |
| H    | 0.18004                  | -0.64373 | -3.74305 |
| C    | 1.95984                  | 1.43131  | -5.74889 |
| H    | 3.01026                  | 3.18844  | -5.07994 |
| H    | 0.82911                  | -0.36526 | -6.10106 |

|   |          |          |          |
|---|----------|----------|----------|
| H | 2.26614  | 1.54122  | -6.78388 |
| C | -0.61203 | 2.81226  | 1.39644  |
| C | -0.02021 | 4.07664  | 1.48773  |
| C | -1.72668 | 2.53107  | 2.19034  |
| C | -0.52828 | 5.03575  | 2.35552  |
| H | 0.84599  | 4.30704  | 0.87891  |
| C | -2.23716 | 3.49376  | 3.05857  |
| H | -2.16481 | 1.54154  | 2.17789  |
| C | -1.64123 | 4.74829  | 3.14387  |
| H | -0.05592 | 6.01054  | 2.41531  |
| H | -3.09683 | 3.2551   | 3.67599  |
| H | -2.03776 | 5.4968   | 3.82174  |
| C | 0.12551  | -2.9334  | 0.90594  |
| C | 1.19099  | -3.04107 | 1.79484  |
| C | -0.66512 | -4.05268 | 0.61293  |
| C | 1.49213  | -4.2631  | 2.3826   |
| H | 1.77856  | -2.15535 | 2.00781  |
| C | -0.35237 | -5.27798 | 1.19682  |
| C | 0.72144  | -5.38248 | 2.07315  |
| H | 2.32622  | -4.3414  | 3.07007  |
| H | -0.96639 | -6.13472 | 0.94598  |
| H | 0.95151  | -6.34299 | 2.52123  |
| O | -1.70223 | -4.04008 | -0.28871 |
| C | -2.5895  | -2.97784 | -0.31579 |
| C | -3.1437  | -2.44267 | 0.83788  |
| C | -2.92944 | -2.45889 | -1.56193 |
| C | -3.99328 | -1.34104 | 0.74269  |
| H | -2.87031 | -2.84006 | 1.80775  |
| C | -3.78734 | -1.36966 | -1.63752 |
| H | -2.48862 | -2.89639 | -2.44958 |
| C | -4.32199 | -0.76691 | -0.48805 |
| H | -4.02761 | -0.9722  | -2.61742 |
| H | -1.16071 | 0.08804  | -2.03826 |
| H | -1.96402 | 0.8101   | 0.07918  |
| H | -4.38162 | -0.92389 | 1.66234  |
| C | -5.22834 | 0.46446  | -0.61945 |
| C | -5.65978 | 1.01608  | 0.74724  |
| H | -6.24139 | 0.28745  | 1.31739  |
| H | -4.80158 | 1.31973  | 1.35238  |
| H | -6.28841 | 1.89863  | 0.60654  |
| C | -4.48301 | 1.58718  | -1.37134 |
| H | -4.14227 | 1.26632  | -2.3577  |
| H | -5.13908 | 2.44999  | -1.51477 |
| H | -3.61046 | 1.93229  | -0.81053 |
| C | -6.49441 | 0.07641  | -1.41029 |
| H | -7.16241 | 0.93679  | -1.51084 |
| H | -6.25151 | -0.2754  | -2.41534 |
| H | -7.04089 | -0.72193 | -0.90201 |

---

**B2/TS**

B3LYP/6-311+G(d,p), C1

---

| Atom | Cartesian (Hartree/Bohr) |          |          |
|------|--------------------------|----------|----------|
|      | X                        | Y        | Z        |
| C    | 2.17672                  | 0.60503  | -1.71877 |
| C    | 0.97696                  | -0.35078 | -1.76687 |
| C    | -0.17224                 | 0.42865  | -1.15502 |
| C    | 1.62473                  | 1.91377  | -1.18153 |
| N    | 0.23142                  | 1.7835   | -0.89812 |
| O    | -1.21235                 | -0.0607  | -0.81301 |
| O    | 2.29476                  | 2.90926  | -1.05333 |
| C    | 3.26284                  | -0.13316 | -0.85298 |
| C    | 1.41735                  | -1.63172 | -0.96541 |
| C    | 2.92952                  | -1.5774  | -1.35505 |
| O    | 3.62542                  | -2.39074 | -1.87559 |
| C    | 4.4712                   | 1.84179  | 3.06497  |
| C    | 4.09148                  | 1.29276  | 1.85966  |
| C    | 3.0872                   | 0.29825  | 1.79063  |
| C    | 2.42756                  | -0.10868 | 2.99     |
| C    | 2.85589                  | 0.46734  | 4.20758  |
| C    | 3.85707                  | 1.41463  | 4.25104  |
| C    | 2.68178                  | -0.31781 | 0.55585  |
| C    | 1.31829                  | -1.05353 | 2.93052  |
| C    | 0.87452                  | -1.56208 | 1.67132  |
| C    | 1.62007                  | -1.19728 | 0.4959   |
| C    | -0.272                   | -2.38958 | 1.6296   |
| H    | -0.6398                  | -2.73896 | 0.67753  |
| C    | -0.9363                  | -2.74916 | 2.78181  |
| C    | -0.4768                  | -2.2915  | 4.02502  |
| C    | 0.61961                  | -1.45805 | 4.0907   |
| H    | 5.2422                   | 2.60475  | 3.09192  |
| H    | 4.56482                  | 1.63369  | 0.95113  |
| H    | 2.38556                  | 0.17733  | 5.13805  |
| H    | 4.15712                  | 1.83819  | 5.2042   |
| H    | -1.81448                 | -3.38356 | 2.72227  |
| H    | -0.98979                 | -2.5801  | 4.93696  |
| H    | 0.93709                  | -1.10578 | 5.06348  |
| C    | 0.73795                  | -2.93625 | -1.30555 |
| C    | 1.3486                   | -4.14174 | -0.93245 |
| C    | -0.47477                 | -2.99251 | -2.00082 |
| C    | 0.76428                  | -5.36413 | -1.24552 |
| H    | 2.28876                  | -4.12595 | -0.39426 |
| C    | -1.05941                 | -4.21841 | -2.31574 |
| H    | -0.99804                 | -2.07933 | -2.25439 |
| C    | -0.44245                 | -5.40822 | -1.94176 |
| H    | 1.25549                  | -6.28484 | -0.94733 |
| H    | -2.0048                  | -4.23756 | -2.84855 |

|   |          |          |          |
|---|----------|----------|----------|
| H | -0.89804 | -6.3623  | -2.18705 |
| C | 4.70804  | 0.25758  | -1.04873 |
| C | 5.71004  | -0.60096 | -0.5746  |
| C | 5.09322  | 1.42531  | -1.71542 |
| C | 7.05445  | -0.29949 | -0.75975 |
| H | 5.43724  | -1.51347 | -0.05735 |
| C | 6.44221  | 1.72651  | -1.90171 |
| H | 4.34429  | 2.13167  | -2.05015 |
| C | 7.42723  | 0.8663   | -1.4273  |
| H | 7.81292  | -0.97929 | -0.38494 |
| H | 6.71825  | 2.64204  | -2.41523 |
| H | 8.47675  | 1.10137  | -1.57299 |
| C | -0.64104 | 2.95103  | -0.87576 |
| C | -0.08012 | 4.1829   | -0.4792  |
| C | -2.05721 | 2.89242  | -0.90707 |
| C | -0.85422 | 5.29769  | -0.18894 |
| H | 0.98704  | 4.25916  | -0.37656 |
| C | -2.82536 | 4.01407  | -0.5844  |
| C | -2.24069 | 5.2131   | -0.21396 |
| H | -0.35936 | 6.22037  | 0.09402  |
| H | -3.902   | 3.92624  | -0.67049 |
| H | -2.86049 | 6.06973  | 0.02886  |
| O | -2.69024 | 1.83481  | -1.51644 |
| C | -3.85797 | 1.31387  | -0.99296 |
| C | -4.83354 | 0.91066  | -1.89509 |
| C | -4.05674 | 1.12801  | 0.37355  |
| C | -6.0108  | 0.32548  | -1.43048 |
| H | -4.66249 | 1.05497  | -2.95632 |
| C | -5.2405  | 0.55257  | 0.81799  |
| H | -3.28532 | 1.41605  | 1.07771  |
| C | -6.24861 | 0.13536  | -0.06539 |
| H | -5.36823 | 0.41646  | 1.88673  |
| H | 0.70452  | -0.62695 | -2.78886 |
| H | 2.58996  | 0.81404  | -2.70867 |
| H | -6.74925 | 0.02293  | -2.1625  |
| C | -7.53727 | -0.50324 | 0.48097  |
| C | -8.51672 | -0.89238 | -0.64014 |
| H | -8.83433 | -0.02583 | -1.22672 |
| H | -8.08419 | -1.62645 | -1.32558 |
| H | -9.41607 | -1.34006 | -0.20874 |
| C | -7.185   | -1.78214 | 1.27428  |
| H | -6.52856 | -1.57067 | 2.12174  |
| H | -8.09183 | -2.25126 | 1.66887  |
| H | -6.67698 | -2.51136 | 0.63741  |
| C | -8.25434 | 0.49547  | 1.41741  |
| H | -9.17366 | 0.05568  | 1.81698  |
| H | -7.62955 | 0.78071  | 2.26711  |
| H | -8.52346 | 1.41068  | 0.88284  |

---

## B2/TS

B3LYP+D3/6-311+G(d,p), C1

| Atom | Cartesian (Hartree/Bohr) |          |          |
|------|--------------------------|----------|----------|
|      | X                        | Y        | Z        |
| C    | 0.79131                  | -0.59828 | 1.52726  |
| C    | -0.26966                 | 0.20911  | 0.76154  |
| C    | -0.6053                  | -0.6464  | -0.43563 |
| C    | 0.88879                  | -1.92516 | 0.79815  |
| N    | -0.09999                 | -1.98181 | -0.22727 |
| O    | -1.08261                 | -0.24608 | -1.45653 |
| O    | 1.6831                   | -2.78916 | 1.07481  |
| C    | 2.06739                  | 0.30342  | 1.52314  |
| C    | 0.41071                  | 1.56843  | 0.39619  |
| C    | 1.32609                  | 1.67888  | 1.65772  |
| O    | 1.43877                  | 2.54219  | 2.46791  |
| C    | 5.64538                  | -1.41134 | -0.67663 |
| C    | 4.54418                  | -0.93997 | 0.00222  |
| C    | 3.63122                  | -0.05599 | -0.61655 |
| C    | 3.82907                  | 0.31508  | -1.98026 |
| C    | 4.97748                  | -0.17846 | -2.63693 |
| C    | 5.87102                  | -1.01509 | -2.00283 |
| C    | 2.48498                  | 0.47613  | 0.05964  |
| C    | 2.839                    | 1.13476  | -2.66643 |
| C    | 1.65482                  | 1.55316  | -1.98673 |
| C    | 1.53553                  | 1.23047  | -0.59456 |
| C    | 0.65604                  | 2.24987  | -2.7038  |
| H    | -0.26095                 | 2.52162  | -2.20735 |
| C    | 0.82919                  | 2.57298  | -4.03072 |
| C    | 2.01026                  | 2.20681  | -4.69181 |
| C    | 2.98479                  | 1.49788  | -4.02309 |
| H    | 6.33221                  | -2.09168 | -0.18492 |
| H    | 4.36764                  | -1.25965 | 1.0172   |
| H    | 5.16595                  | 0.08678  | -3.66855 |
| H    | 6.74091                  | -1.37907 | -2.53942 |
| H    | 0.04837                  | 3.10641  | -4.562   |
| H    | 2.15393                  | 2.46675  | -5.73535 |
| H    | 3.87495                  | 1.21062  | -4.56638 |
| C    | -0.48604                 | 2.74483  | 0.14983  |
| C    | 0.06996                  | 4.02886  | 0.15736  |
| C    | -1.85202                 | 2.60308  | -0.10655 |
| C    | -0.71875                 | 5.145    | -0.09303 |
| H    | 1.12839                  | 4.15228  | 0.35173  |
| C    | -2.64113                 | 3.72286  | -0.35992 |
| H    | -2.30423                 | 1.62161  | -0.16331 |
| C    | -2.0795                  | 4.99588  | -0.35486 |
| H    | -0.27015                 | 6.13272  | -0.08548 |
| H    | -3.69641                 | 3.59241  | -0.57042 |

|   |          |          |          |
|---|----------|----------|----------|
| H | -2.69592 | 5.86604  | -0.55479 |
| C | 3.11209  | 0.06412  | 2.57289  |
| C | 4.11204  | 1.02799  | 2.74729  |
| C | 3.12499  | -1.07168 | 3.38405  |
| C | 5.10379  | 0.85636  | 3.70419  |
| H | 4.11689  | 1.91303  | 2.1219   |
| C | 4.1193   | -1.24328 | 4.3455   |
| H | 2.39466  | -1.85527 | 3.23228  |
| C | 5.11093  | -0.28173 | 4.50916  |
| H | 5.87273  | 1.61238  | 3.82282  |
| H | 4.12043  | -2.13774 | 4.95959  |
| H | 5.88663  | -0.41764 | 5.25541  |
| C | -0.76301 | -3.21694 | -0.57952 |
| C | -0.20717 | -4.43027 | -0.13516 |
| C | -1.83538 | -3.31962 | -1.49949 |
| C | -0.6932  | -5.66467 | -0.54532 |
| H | 0.65081  | -4.40674 | 0.51232  |
| C | -2.29732 | -4.56456 | -1.91714 |
| C | -1.72851 | -5.74498 | -1.46627 |
| H | -0.22376 | -6.5631  | -0.16046 |
| H | -3.14149 | -4.56425 | -2.59648 |
| H | -2.10027 | -6.70231 | -1.8134  |
| O | -2.58753 | -2.25447 | -1.94837 |
| C | -3.41973 | -1.6174  | -1.05534 |
| C | -3.58342 | -1.99576 | 0.27146  |
| C | -4.09613 | -0.4983  | -1.54239 |
| C | -4.40953 | -1.23828 | 1.10791  |
| H | -3.08442 | -2.87307 | 0.6624   |
| C | -4.91462 | 0.23287  | -0.6988  |
| H | -3.93865 | -0.20524 | -2.57306 |
| C | -5.0877  | -0.10904 | 0.6538   |
| H | -5.42373 | 1.09969  | -1.10552 |
| H | -1.17919 | 0.36642  | 1.34585  |
| H | 0.49418  | -0.81401 | 2.5566   |
| H | -4.51372 | -1.56022 | 2.13615  |
| C | -6.00377 | 0.73324  | 1.54895  |
| C | -5.99041 | 0.25322  | 3.00763  |
| H | -6.35532 | -0.77241 | 3.10419  |
| H | -4.98827 | 0.30186  | 3.4421   |
| H | -6.64196 | 0.88897  | 3.6121   |
| C | -5.54572 | 2.20522  | 1.52597  |
| H | -5.61455 | 2.63564  | 0.52504  |
| H | -6.17349 | 2.81133  | 2.18544  |
| H | -4.50938 | 2.30429  | 1.85738  |
| C | -7.45035 | 0.64164  | 1.02189  |
| H | -8.12485 | 1.24062  | 1.64117  |
| H | -7.52924 | 1.00604  | -0.0048  |
| H | -7.80467 | -0.39222 | 1.03451  |



**B2/PD**

B3LYP/6-311+G(d,p), C1

---

| Atom | Cartesian (Hartree/Bohr) |          |          |
|------|--------------------------|----------|----------|
|      | X                        | Y        | Z        |
| C    | 2.80843                  | 0.52503  | -1.48119 |
| C    | 1.87116                  | -0.59596 | -1.9995  |
| C    | 0.54603                  | 0.09885  | -2.2991  |
| C    | 1.96543                  | 1.79275  | -1.49618 |
| N    | 0.69874                  | 1.46241  | -2.00298 |
| O    | -0.44778                 | -0.39629 | -2.76814 |
| O    | 2.3122                   | 2.90311  | -1.18167 |
| C    | 3.31661                  | 0.02854  | -0.08255 |
| C    | 1.88771                  | -1.70183 | -0.88086 |
| C    | 3.37786                  | -1.49207 | -0.44693 |
| O    | 4.2856                   | -2.26063 | -0.40072 |
| C    | 2.19837                  | 2.51241  | 3.56593  |
| C    | 2.52395                  | 1.81324  | 2.42424  |
| C    | 1.77637                  | 0.68311  | 2.01761  |
| C    | 0.63927                  | 0.28837  | 2.7856   |
| C    | 0.34612                  | 1.02246  | 3.95735  |
| C    | 1.10723                  | 2.10474  | 4.34654  |
| C    | 2.09986                  | -0.08725 | 0.84725  |
| C    | -0.20507                 | -0.80975 | 2.33075  |
| C    | 0.07557                  | -1.46514 | 1.09328  |
| C    | 1.27796                  | -1.09832 | 0.39366  |
| C    | -0.8248                  | -2.44619 | 0.61624  |
| H    | -0.64448                 | -2.91259 | -0.34012 |
| C    | -1.93141                 | -2.81743 | 1.34833  |
| C    | -2.17944                 | -2.21869 | 2.59124  |
| C    | -1.33783                 | -1.23298 | 3.06155  |
| H    | 2.78414                  | 3.37905  | 3.85407  |
| H    | 3.35848                  | 2.14264  | 1.82389  |
| H    | -0.50411                 | 0.74892  | 4.56881  |
| H    | 0.84974                  | 2.64763  | 5.25049  |
| H    | -2.60738                 | -3.57185 | 0.95976  |
| H    | -3.041                   | -2.51811 | 3.17926  |
| H    | -1.56713                 | -0.77649 | 4.01571  |
| C    | 1.56065                  | -3.11281 | -1.30811 |
| C    | 1.95967                  | -4.18416 | -0.4969  |
| C    | 0.8875                   | -3.39562 | -2.5018  |
| C    | 1.6945                   | -5.49737 | -0.86928 |
| H    | 2.48247                  | -3.99166 | 0.43222  |
| C    | 0.6223                   | -4.7131  | -2.87416 |
| H    | 0.52168                  | -2.58702 | -3.12281 |
| C    | 1.02636                  | -5.76848 | -2.06222 |
| H    | 2.01464                  | -6.31142 | -0.22677 |
| H    | 0.09216                  | -4.90921 | -3.80081 |

|   |          |          |          |
|---|----------|----------|----------|
| H | 0.82116  | -6.79372 | -2.35353 |
| C | 4.62167  | 0.5927   | 0.4251   |
| C | 5.29542  | -0.07399 | 1.45779  |
| C | 5.20122  | 1.74763  | -0.11109 |
| C | 6.51099  | 0.39964  | 1.93875  |
| H | 4.86712  | -0.97093 | 1.88967  |
| C | 6.42107  | 2.22124  | 0.37101  |
| H | 4.67991  | 2.31513  | -0.87217 |
| C | 7.08148  | 1.54937  | 1.39486  |
| H | 7.01538  | -0.13328 | 2.73845  |
| H | 6.84841  | 3.124    | -0.05389 |
| H | 8.03086  | 1.91876  | 1.76938  |
| C | -0.3099  | 2.44083  | -2.26863 |
| C | -0.05955 | 3.45155  | -3.19351 |
| C | -1.54637 | 2.38087  | -1.6114  |
| C | -1.03415 | 4.39824  | -3.48665 |
| H | 0.9067   | 3.4865   | -3.68309 |
| C | -2.53026 | 3.32257  | -1.91994 |
| C | -2.27068 | 4.32332  | -2.85043 |
| H | -0.83034 | 5.18196  | -4.20745 |
| H | -3.48971 | 3.27286  | -1.42069 |
| H | -3.0431  | 5.05215  | -3.07332 |
| O | -1.70087 | 1.41264  | -0.65896 |
| C | -2.99007 | 1.01147  | -0.31782 |
| C | -3.72503 | 0.21102  | -1.18109 |
| C | -3.50799 | 1.37776  | 0.91821  |
| C | -4.99899 | -0.2113  | -0.80367 |
| H | -3.29144 | -0.08532 | -2.12961 |
| C | -4.77969 | 0.94448  | 1.27914  |
| H | -2.91115 | 1.98937  | 1.58557  |
| C | -5.55978 | 0.14686  | 0.42827  |
| H | -5.16604 | 1.24183  | 2.24826  |
| H | 2.23398  | -1.03467 | -2.93238 |
| H | 3.66668  | 0.67944  | -2.14013 |
| H | -5.55084 | -0.83696 | -1.49384 |
| C | -6.96812 | -0.29424 | 0.86524  |
| C | -7.65886 | -1.17725 | -0.18923 |
| H | -7.78883 | -0.65481 | -1.14084 |
| H | -7.10292 | -2.09917 | -0.38049 |
| H | -8.6535  | -1.46378 | 0.16276  |
| C | -6.87671 | -1.10273 | 2.17892  |
| H | -6.43887 | -0.51785 | 2.991    |
| H | -7.87236 | -1.42229 | 2.50217  |
| H | -6.2619  | -1.99709 | 2.04605  |
| C | -7.849   | 0.955    | 1.09469  |
| H | -8.85589 | 0.66299  | 1.40912  |
| H | -7.43842 | 1.60863  | 1.86792  |
| H | -7.94075 | 1.54454  | 0.17833  |

---

## B2/PD

B3LYP+D3/6-311+G(d,p), C1

| Atom | Cartesian (Hartree/Bohr) |             |             |
|------|--------------------------|-------------|-------------|
|      | X                        | Y           | Z           |
| C    | 3.04282400               | -0.50146300 | 1.20217700  |
| C    | 2.44109200               | 0.84115000  | 1.69122000  |
| C    | 1.16047900               | 0.45760700  | 2.42087200  |
| C    | 2.11552000               | -1.57911000 | 1.74069000  |
| N    | 1.09326300               | -0.94122900 | 2.45269500  |
| O    | 0.34551400               | 1.19807000  | 2.90993600  |
| O    | 2.22212200               | -2.77180600 | 1.60750500  |
| C    | 3.08708700               | -0.37607200 | -0.35766800 |
| C    | 2.23974000               | 1.70865800  | 0.40002600  |
| C    | 3.45465500               | 1.14478700  | -0.40896500 |
| O    | 4.37029300               | 1.70101000  | -0.92657100 |
| C    | 0.47685200               | -3.25486500 | -2.71625700 |
| C    | 1.25324300               | -2.43056700 | -1.93096100 |
| C    | 0.85445500               | -1.10369200 | -1.64997300 |
| C    | -0.39571900              | -0.62767700 | -2.14649400 |
| C    | -1.15200500              | -1.49454300 | -2.96647500 |
| C    | -0.72737400              | -2.77539900 | -3.25380200 |
| C    | 1.64844000               | -0.20397600 | -0.86286500 |
| C    | -0.88750200              | 0.68541800  | -1.75039800 |
| C    | -0.14038700              | 1.48151000  | -0.82970000 |
| C    | 1.16430200               | 1.01727200  | -0.44937800 |
| C    | -0.70201100              | 2.68561700  | -0.34636600 |
| H    | -0.16812800              | 3.26227700  | 0.39236500  |
| C    | -1.92389600              | 3.13330400  | -0.79896400 |
| C    | -2.63258300              | 2.38613900  | -1.75009000 |
| C    | -2.12829700              | 1.18612700  | -2.20184000 |
| H    | 0.79856500               | -4.27184400 | -2.91462400 |
| H    | 2.17308000               | -2.80834700 | -1.51049700 |
| H    | -2.10398600              | -1.16776900 | -3.36358700 |
| H    | -1.33680900              | -3.41682800 | -3.88269900 |
| H    | -2.33472600              | 4.06122100  | -0.41466300 |
| H    | -3.59421100              | 2.73552600  | -2.11158200 |
| H    | -2.72137800              | 0.61321400  | -2.90139200 |
| C    | 2.22730500               | 3.20359500  | 0.56881200  |
| C    | 2.45640500               | 4.01566100  | -0.54913400 |
| C    | 1.97256000               | 3.81298500  | 1.80124100  |
| C    | 2.43200900               | 5.40127400  | -0.43674100 |
| H    | 2.65108400               | 3.55932900  | -1.51198000 |
| C    | 1.94813900               | 5.20234800  | 1.91278400  |
| H    | 1.73005800               | 3.20742300  | 2.66548100  |
| C    | 2.17895900               | 6.00111500  | 0.79619100  |
| H    | 2.61068500               | 6.01408400  | -1.31441600 |
| H    | 1.73787600               | 5.65769000  | 2.87531000  |

|   |             |             |             |
|---|-------------|-------------|-------------|
| H | 2.15823100  | 7.08275500  | 0.88352600  |
| C | 4.03558200  | -1.26983600 | -1.10917500 |
| C | 4.33076100  | -0.96132100 | -2.44307100 |
| C | 4.63205500  | -2.39415700 | -0.53172100 |
| C | 5.19927700  | -1.75657400 | -3.18113800 |
| H | 3.87332900  | -0.09409300 | -2.90499000 |
| C | 5.50385200  | -3.19139300 | -1.27258500 |
| H | 4.37521300  | -2.68798900 | 0.47799500  |
| C | 5.79165000  | -2.87599600 | -2.59723100 |
| H | 5.41514000  | -1.50178400 | -4.21373400 |
| H | 5.94974300  | -4.06661900 | -0.81090400 |
| H | 6.46892600  | -3.49856300 | -3.17316700 |
| C | 0.02081400  | -1.64805200 | 3.07401800  |
| C | 0.21330800  | -2.30382100 | 4.28286300  |
| C | -1.23015300 | -1.66535700 | 2.44729700  |
| C | -0.84484500 | -2.97281400 | 4.89139900  |
| H | 1.19583400  | -2.27897300 | 4.74076000  |
| C | -2.29612000 | -2.32183400 | 3.06230400  |
| C | -2.09526700 | -2.97099400 | 4.27807700  |
| H | -0.69460200 | -3.48461500 | 5.83510800  |
| H | -3.26862600 | -2.32588600 | 2.58692000  |
| H | -2.92970700 | -3.48296600 | 4.74616800  |
| O | -1.30507400 | -1.03614500 | 1.23771500  |
| C | -2.56082000 | -0.76909800 | 0.70361000  |
| C | -3.24131000 | 0.37263200  | 1.09178900  |
| C | -3.08753500 | -1.62175900 | -0.25716400 |
| C | -4.46669000 | 0.66930900  | 0.49861100  |
| H | -2.79244800 | 1.03030800  | 1.82697800  |
| C | -4.30739900 | -1.30715100 | -0.84288100 |
| H | -2.52454300 | -2.49737200 | -0.55666700 |
| C | -5.02400300 | -0.15481800 | -0.48442800 |
| H | -4.69766500 | -1.97491700 | -1.60335200 |
| H | 3.10094300  | 1.36233500  | 2.38796900  |
| H | 4.05151900  | -0.67564300 | 1.58279100  |
| H | -4.96951300 | 1.57755600  | 0.80389300  |
| C | -6.34948800 | 0.16975000  | -1.19118400 |
| C | -6.97680100 | 1.47963900  | -0.68554900 |
| H | -7.20806600 | 1.43562100  | 0.38202700  |
| H | -6.32175400 | 2.33824800  | -0.85717700 |
| H | -7.91352900 | 1.67204600  | -1.21530300 |
| C | -6.09605500 | 0.31627200  | -2.70859200 |
| H | -5.70162500 | -0.60288100 | -3.14782300 |
| H | -7.02578600 | 0.55908200  | -3.23196800 |
| H | -5.37782000 | 1.11598900  | -2.90915300 |
| C | -7.35885500 | -0.97347300 | -0.94895400 |
| H | -8.30837100 | -0.76100500 | -1.45013900 |
| H | -6.99096600 | -1.92910400 | -1.32929300 |
| H | -7.55914900 | -1.09606300 | 0.11886100  |

## C/RC

B3LYP/6-311+G(d,p), C1

| Atom | Cartesian (Hartree/Bohr) |          |          |
|------|--------------------------|----------|----------|
|      | X                        | Y        | Z        |
| C    | 1.54651                  | 1.27455  | -1.25285 |
| C    | 0.87596                  | -0.11977 | -1.36224 |
| C    | -0.02797                 | -0.22505 | -0.14022 |
| C    | 0.98018                  | 1.89162  | 0.01994  |
| N    | 0.10475                  | 0.95973  | 0.59621  |
| O    | -0.74537                 | -1.14627 | 0.15986  |
| O    | 1.20903                  | 2.98699  | 0.46632  |
| C    | 3.09402                  | 0.99225  | -1.25968 |
| C    | 2.06574                  | -1.14718 | -1.43402 |
| C    | 3.04717                  | -0.22955 | -2.23359 |
| O    | 3.59496                  | -0.40828 | -3.27518 |
| C    | 5.44443                  | 2.18498  | 2.45874  |
| C    | 4.70355                  | 1.8618   | 1.34299  |
| C    | 4.16951                  | 0.563    | 1.16641  |
| C    | 4.3704                   | -0.41465 | 2.18872  |
| C    | 5.14827                  | -0.04834 | 3.3108   |
| C    | 5.68058                  | 1.21659  | 3.44496  |
| C    | 3.41661                  | 0.17764  | 0.00234  |
| C    | 3.74605                  | -1.72793 | 2.07901  |
| C    | 2.92833                  | -2.04162 | 0.95062  |
| C    | 2.8229                   | -1.06376 | -0.09969 |
| C    | 2.25315                  | -3.2847  | 0.91548  |
| H    | 1.60287                  | -3.51229 | 0.08494  |
| C    | 2.40353                  | -4.20896 | 1.92602  |
| C    | 3.23904                  | -3.92338 | 3.01519  |
| C    | 3.88655                  | -2.70824 | 3.08756  |
| H    | 5.84071                  | 3.18874  | 2.57097  |
| H    | 4.52269                  | 2.61721  | 0.59378  |
| H    | 5.33337                  | -0.76694 | 4.09858  |
| H    | 6.27163                  | 1.4625   | 4.3214   |
| H    | 1.87299                  | -5.15409 | 1.87632  |
| H    | 3.36861                  | -4.65135 | 3.8097   |
| H    | 4.50885                  | -2.51123 | 3.95073  |
| C    | 1.7918                   | -2.47836 | -2.09158 |
| C    | 2.87039                  | -3.25861 | -2.53114 |
| C    | 0.49407                  | -2.9567  | -2.30259 |
| C    | 2.6567                   | -4.4793  | -3.16179 |
| H    | 3.88522                  | -2.90952 | -2.38118 |
| C    | 0.28092                  | -4.18026 | -2.93644 |
| H    | -0.35679                 | -2.40051 | -1.92917 |
| C    | 1.35947                  | -4.94498 | -3.37018 |
| H    | 3.50652                  | -5.06612 | -3.49553 |
| H    | -0.73417                 | -4.53525 | -3.08374 |

|   |          |          |          |
|---|----------|----------|----------|
| H | 1.19281  | -5.89684 | -3.86437 |
| C | 3.99923  | 2.11215  | -1.71383 |
| C | 5.307    | 1.8117   | -2.1192  |
| C | 3.5747   | 3.44454  | -1.76504 |
| C | 6.1633   | 2.81357  | -2.56273 |
| H | 5.65885  | 0.78725  | -2.09048 |
| C | 4.43416  | 4.44811  | -2.2107  |
| H | 2.58861  | 3.71404  | -1.40751 |
| C | 5.72936  | 4.1373   | -2.61324 |
| H | 7.17141  | 2.55843  | -2.87345 |
| H | 4.08685  | 5.47615  | -2.23454 |
| H | 6.39751  | 4.91892  | -2.96064 |
| C | -0.66821 | 1.23435  | 1.76626  |
| C | -0.05123 | 1.35952  | 3.00679  |
| C | -2.05812 | 1.36591  | 1.6514   |
| C | -0.81417 | 1.60008  | 4.1448   |
| H | 1.02591  | 1.259    | 3.0707   |
| C | -2.82359 | 1.59235  | 2.79504  |
| C | -2.1986  | 1.70769  | 4.03324  |
| H | -0.33073 | 1.69646  | 5.11036  |
| H | -3.89894 | 1.68831  | 2.7065   |
| H | -2.80248 | 1.8905   | 4.91614  |
| O | -2.58132 | 1.3274   | 0.38578  |
| C | -3.88777 | 0.87872  | 0.1963   |
| C | -4.79139 | 1.75585  | -0.38611 |
| C | -4.2288  | -0.42979 | 0.51789  |
| C | -6.09478 | 1.32757  | -0.66065 |
| H | -4.45111 | 2.75657  | -0.6174  |
| C | -5.52549 | -0.88355 | 0.26345  |
| H | -3.46589 | -1.07002 | 0.93987  |
| C | -6.43181 | 0.01208  | -0.32098 |
| H | -7.4387  | -0.33358 | -0.52474 |
| H | 0.25983  | -0.21286 | -2.25924 |
| H | 1.29348  | 1.92366  | -2.09402 |
| C | -7.14618 | 2.25078  | -1.30435 |
| C | -8.33363 | 2.43368  | -0.33239 |
| H | -9.09258 | 3.08777  | -0.77289 |
| H | -8.8155  | 1.48343  | -0.09156 |
| H | -8.00499 | 2.88567  | 0.60759  |
| C | -7.65373 | 1.61991  | -2.62059 |
| H | -8.12428 | 0.64821  | -2.4552  |
| H | -8.39657 | 2.26946  | -3.09382 |
| H | -6.8335  | 1.47455  | -3.3287  |
| C | -6.57801 | 3.64283  | -1.63194 |
| H | -6.23424 | 4.16773  | -0.73661 |
| H | -5.74359 | 3.58862  | -2.33636 |
| H | -7.35405 | 4.26006  | -2.09239 |
| C | -5.9701  | -2.32115 | 0.59167  |
| C | -4.8403  | -3.14913 | 1.22886  |

|   |          |          |          |
|---|----------|----------|----------|
| H | -3.97595 | -3.24527 | 0.56688  |
| H | -4.49632 | -2.71557 | 2.17164  |
| H | -5.1997  | -4.15862 | 1.44627  |
| C | -7.15363 | -2.28082 | 1.58479  |
| H | -8.01296 | -1.74154 | 1.17946  |
| H | -7.48468 | -3.29582 | 1.82551  |
| H | -6.86576 | -1.79107 | 2.51915  |
| C | -6.41428 | -3.03348 | -0.70573 |
| H | -6.72923 | -4.05905 | -0.48947 |
| H | -7.25327 | -2.52598 | -1.18768 |
| H | -5.59501 | -3.07803 | -1.42836 |

---

## C/RC

B3LYP+D3/6-311+G(d,p), C1

| Atom | Cartesian (Hartree/Bohr) |          |          |
|------|--------------------------|----------|----------|
|      | X                        | Y        | Z        |
| C    | -0.36922                 | 0.01363  | -1.00419 |
| C    | 0.0848                   | -1.26241 | -0.25335 |
| C    | 0.08814                  | -0.88061 | 1.21563  |
| C    | -0.64136                 | 1.0407   | 0.07917  |
| N    | -0.30791                 | 0.4605   | 1.30755  |
| O    | 0.38106                  | -1.57563 | 2.15332  |
| O    | -1.05611                 | 2.16353  | -0.06385 |
| C    | 0.85116                  | 0.38816  | -1.91897 |
| C    | 1.51727                  | -1.59161 | -0.80985 |
| C    | 1.28846                  | -1.0698  | -2.26111 |
| O    | 1.40039                  | -1.61547 | -3.31237 |
| C    | 2.47901                  | 4.43097  | -0.69032 |
| C    | 1.99436                  | 3.21218  | -1.10847 |
| C    | 2.5096                   | 2.00379  | -0.58559 |
| C    | 3.53157                  | 2.05194  | 0.41014  |
| C    | 4.0092                   | 3.32144  | 0.80484  |
| C    | 3.50142                  | 4.48543  | 0.26837  |
| C    | 2.00325                  | 0.71658  | -0.96379 |
| C    | 4.00645                  | 0.82366  | 1.03192  |
| C    | 3.41202                  | -0.42947 | 0.6922   |
| C    | 2.41139                  | -0.43873 | -0.33562 |
| C    | 3.8132                   | -1.59375 | 1.38596  |
| H    | 3.34107                  | -2.53592 | 1.15997  |
| C    | 4.79403                  | -1.54393 | 2.35066  |
| C    | 5.41286                  | -0.3238  | 2.6575   |
| C    | 5.02041                  | 0.83021  | 2.01446  |
| H    | 2.06205                  | 5.34545  | -1.09773 |
| H    | 1.19419                  | 3.17911  | -1.83079 |
| H    | 4.78015                  | 3.39733  | 1.55976  |
| H    | 3.88707                  | 5.44387  | 0.59965  |
| H    | 5.08413                  | -2.45011 | 2.87112  |
| H    | 6.19439                  | -0.28266 | 3.40883  |
| H    | 5.5092                   | 1.75796  | 2.27999  |
| C    | 1.98041                  | -3.01484 | -0.70989 |
| C    | 3.0532                   | -3.43623 | -1.50335 |
| C    | 1.38231                  | -3.93284 | 0.15666  |
| C    | 3.51719                  | -4.74431 | -1.43003 |
| H    | 3.52912                  | -2.73578 | -2.17872 |
| C    | 1.84746                  | -5.24399 | 0.22923  |
| H    | 0.59461                  | -3.61124 | 0.82512  |
| C    | 2.9145                   | -5.65481 | -0.56388 |
| H    | 4.35078                  | -5.05391 | -2.0515  |
| H    | 1.37811                  | -5.93992 | 0.91653  |

|   |          |          |          |
|---|----------|----------|----------|
| H | 3.27766  | -6.6755  | -0.50584 |
| C | 0.60834  | 1.25639  | -3.11683 |
| C | 1.64522  | 1.42175  | -4.04202 |
| C | -0.60923 | 1.89523  | -3.34995 |
| C | 1.46988  | 2.2155   | -5.16829 |
| H | 2.5971   | 0.93175  | -3.87076 |
| C | -0.7869  | 2.69081  | -4.47994 |
| H | -1.41152 | 1.81131  | -2.63133 |
| C | 0.25097  | 2.85488  | -5.39158 |
| H | 2.28505  | 2.33549  | -5.87397 |
| H | -1.73832 | 3.18745  | -4.63903 |
| H | 0.11406  | 3.47684  | -6.26987 |
| C | -0.40597 | 1.15174  | 2.54818  |
| C | 0.44356  | 2.22534  | 2.79655  |
| C | -1.33607 | 0.74723  | 3.51476  |
| C | 0.38687  | 2.8916   | 4.01486  |
| H | 1.15243  | 2.51742  | 2.03091  |
| C | -1.37817 | 1.4079   | 4.73914  |
| C | -0.51781 | 2.47188  | 4.9884   |
| H | 1.05348  | 3.72467  | 4.2051   |
| H | -2.09524 | 1.07118  | 5.47833  |
| H | -0.56254 | 2.98037  | 5.94538  |
| O | -2.18159 | -0.31982 | 3.33363  |
| C | -2.87788 | -0.42013 | 2.13692  |
| C | -3.49775 | 0.68819  | 1.57708  |
| C | -2.92908 | -1.67148 | 1.53587  |
| C | -4.16453 | 0.56349  | 0.35797  |
| H | -3.42208 | 1.63971  | 2.08325  |
| C | -3.59077 | -1.82412 | 0.31573  |
| H | -2.41812 | -2.48771 | 2.02625  |
| C | -4.19006 | -0.69434 | -0.25357 |
| H | -4.70292 | -0.79882 | -1.20151 |
| H | -0.58982 | -2.10147 | -0.41089 |
| H | -1.27115 | -0.14392 | -1.59564 |
| C | -4.84997 | 1.75735  | -0.31941 |
| C | -6.34423 | 1.43943  | -0.52485 |
| H | -6.85292 | 2.28786  | -0.99168 |
| H | -6.4921  | 0.56985  | -1.16887 |
| H | -6.83441 | 1.23312  | 0.43002  |
| C | -4.18087 | 2.0204   | -1.68343 |
| H | -4.22281 | 1.14613  | -2.33746 |
| H | -4.6803  | 2.84561  | -2.19975 |
| H | -3.13507 | 2.29359  | -1.53831 |
| C | -4.73322 | 3.04124  | 0.51518  |
| H | -5.20981 | 2.93618  | 1.49358  |
| H | -3.69036 | 3.32838  | 0.6659   |
| H | -5.23077 | 3.86383  | -0.00461 |
| C | -3.68454 | -3.1777  | -0.40259 |
| C | -2.8865  | -4.27595 | 0.31578  |

|   |          |          |          |
|---|----------|----------|----------|
| H | -1.82199 | -4.03742 | 0.38054  |
| H | -3.25588 | -4.45189 | 1.32873  |
| H | -2.97476 | -5.21614 | -0.23374 |
| C | -5.16518 | -3.60886 | -0.45173 |
| H | -5.7774  | -2.88584 | -0.99485 |
| H | -5.26665 | -4.57699 | -0.9509  |
| H | -5.57597 | -3.70082 | 0.55675  |
| C | -3.14477 | -3.05382 | -1.84193 |
| H | -3.23203 | -4.01064 | -2.36364 |
| H | -3.69186 | -2.31018 | -2.42396 |
| H | -2.08903 | -2.77098 | -1.85092 |

---

## C/TS

B3LYP/6-311+G(d,p), C1

| Atom | Cartesian (Hartree/Bohr) |          |          |
|------|--------------------------|----------|----------|
|      | X                        | Y        | Z        |
| C    | -2.4917                  | -0.23937 | -1.92297 |
| C    | -1.32085                 | 0.7315   | -1.71817 |
| C    | -0.17969                 | -0.13165 | -1.21127 |
| C    | -1.91858                 | -1.61935 | -1.65451 |
| N    | -0.5506                  | -1.51951 | -1.26096 |
| O    | 0.82208                  | 0.3022   | -0.71539 |
| O    | -2.55665                 | -2.63444 | -1.79349 |
| C    | -3.62799                 | 0.27326  | -0.96361 |
| C    | -1.83429                 | 1.81452  | -0.69735 |
| C    | -3.3297                  | 1.79834  | -1.1503  |
| O    | -4.03639                 | 2.67983  | -1.5245  |
| C    | -4.86227                 | -2.52188 | 2.40834  |
| C    | -4.47572                 | -1.71544 | 1.36014  |
| C    | -3.51345                 | -0.6932  | 1.53736  |
| C    | -2.90498                 | -0.52536 | 2.81822  |
| C    | -3.33907                 | -1.36253 | 3.87099  |
| C    | -4.29831                 | -2.33426 | 3.67841  |
| C    | -3.0984                  | 0.18152  | 0.47365  |
| C    | -1.83677                 | 0.45099  | 2.99861  |
| C    | -1.37755                 | 1.22602  | 1.88991  |
| C    | -2.07108                 | 1.0881   | 0.63706  |
| C    | -0.26694                 | 2.08481  | 2.06473  |
| H    | 0.11569                  | 2.63655  | 1.22031  |
| C    | 0.34401                  | 2.22231  | 3.29213  |
| C    | -0.13343                 | 1.50003  | 4.39548  |
| C    | -1.19317                 | 0.63095  | 4.24413  |
| H    | -5.59935                 | -3.30154 | 2.24668  |
| H    | -4.90914                 | -1.87353 | 0.384    |
| H    | -2.90621                 | -1.25955 | 4.85744  |
| H    | -4.60394                 | -2.96198 | 4.50937  |
| H    | 1.19328                  | 2.88884  | 3.4004   |
| H    | 0.33701                  | 1.61281  | 5.36704  |
| H    | -1.52579                 | 0.07393  | 5.11027  |
| C    | -1.19095                 | 3.17917  | -0.74107 |
| C    | -1.85569                 | 4.26508  | -0.15421 |
| C    | 0.03813                  | 3.41207  | -1.36733 |
| C    | -1.30807                 | 5.54258  | -0.19319 |
| H    | -2.80963                 | 4.11195  | 0.33619  |
| C    | 0.58598                  | 4.69354  | -1.40778 |
| H    | 0.60161                  | 2.5865   | -1.78363 |
| C    | -0.08456                 | 5.76359  | -0.8233  |
| H    | -1.8412                  | 6.36842  | 0.26688  |
| H    | 1.54464                  | 4.849    | -1.89235 |

|   |          |          |          |
|---|----------|----------|----------|
| H | 0.34233  | 6.76093  | -0.85514 |
| C | -5.05313 | -0.10728 | -1.28577 |
| C | -6.09449 | 0.5947   | -0.6624  |
| C | -5.38226 | -1.10716 | -2.20677 |
| C | -7.42316 | 0.30391  | -0.94917 |
| H | -5.86414 | 1.375    | 0.05394  |
| C | -6.71578 | -1.39733 | -2.49503 |
| H | -4.60211 | -1.69942 | -2.66782 |
| C | -7.74027 | -0.69358 | -1.87008 |
| H | -8.21285 | 0.86084  | -0.45512 |
| H | -6.94874 | -2.18255 | -3.20726 |
| H | -8.77751 | -0.92024 | -2.09538 |
| C | 0.35867  | -2.64984 | -1.41092 |
| C | -0.18653 | -3.94743 | -1.31338 |
| C | 1.77139  | -2.55969 | -1.32901 |
| C | 0.6019   | -5.08391 | -1.20253 |
| H | -1.2548  | -4.06361 | -1.30423 |
| C | 2.55191  | -3.71099 | -1.19005 |
| C | 1.9838   | -4.97099 | -1.11459 |
| H | 0.11922  | -6.05363 | -1.14803 |
| H | 3.62835  | -3.58737 | -1.17952 |
| H | 2.6139   | -5.84793 | -1.00994 |
| O | 2.41072  | -1.38859 | -1.65634 |
| C | 3.5268   | -0.96945 | -0.9517  |
| C | 4.53887  | -0.37825 | -1.69889 |
| C | 3.6102   | -1.07527 | 0.43222  |
| C | 5.67644  | 0.12386  | -1.06154 |
| H | 4.40748  | -0.32493 | -2.77137 |
| C | 4.73832  | -0.58794 | 1.09693  |
| H | 2.78491  | -1.51895 | 0.97092  |
| C | 5.75197  | 0.00279  | 0.33137  |
| H | 6.62982  | 0.38484  | 0.83956  |
| H | -1.00968 | 1.21072  | -2.64994 |
| H | -2.86704 | -0.24096 | -2.94909 |
| C | 6.82793  | 0.78743  | -1.83987 |
| C | 8.13921  | 0.00886  | -1.58959 |
| H | 8.9661   | 0.46202  | -2.14554 |
| H | 8.41671  | 0.00314  | -0.53314 |
| H | 8.04612  | -1.03147 | -1.9131  |
| C | 7.00006  | 2.24654  | -1.36094 |
| H | 7.23508  | 2.3021   | -0.29571 |
| H | 7.81388  | 2.73561  | -1.90565 |
| H | 6.08682  | 2.82401  | -1.52842 |
| C | 6.57095  | 0.81088  | -3.35697 |
| H | 6.4653   | -0.196   | -3.77007 |
| H | 5.67177  | 1.37811  | -3.61207 |
| H | 7.41238  | 1.28659  | -3.86787 |
| C | 4.88446  | -0.67056 | 2.62854  |
| C | 3.67671  | -1.35073 | 3.29727  |

|   |         |          |         |
|---|---------|----------|---------|
| H | 2.74668 | -0.80512 | 3.11896 |
| H | 3.54123 | -2.37864 | 2.95007 |
| H | 3.82893 | -1.39042 | 4.37946 |
| C | 6.14923 | -1.48451 | 2.98374 |
| H | 7.05703 | -1.03072 | 2.57973 |
| H | 6.26844 | -1.55117 | 4.06977 |
| H | 6.08442 | -2.50244 | 2.58941 |
| C | 5.01233 | 0.75485  | 3.21157 |
| H | 5.11642 | 0.71451  | 4.30055 |
| H | 5.88312 | 1.28241  | 2.816   |
| H | 4.12715 | 1.3526   | 2.97858 |

---



## C/TS

B3LYP+D3/6-311+G(d,p), C1

| Atom | Cartesian (Hartree/Bohr) |          |          |
|------|--------------------------|----------|----------|
|      | X                        | Y        | Z        |
| C    | -0.90045                 | -1.07757 | -0.94599 |
| C    | 0.04375                  | 0.09694  | -0.65438 |
| C    | 0.43032                  | -0.06719 | 0.79596  |
| C    | -0.98297                 | -1.85835 | 0.35341  |
| N    | -0.06826                 | -1.32096 | 1.31712  |
| O    | 0.92744                  | 0.78977  | 1.46942  |
| O    | -1.72098                 | -2.79769 | 0.51412  |
| C    | -2.24288                 | -0.43195 | -1.43124 |
| C    | -0.79864                 | 1.38593  | -0.94614 |
| C    | -1.61526                 | 0.80962  | -2.14529 |
| O    | -1.73556                 | 1.20319  | -3.26178 |
| C    | -5.91724                 | -1.28634 | 1.11359  |
| C    | -4.78769                 | -1.07401 | 0.3546   |
| C    | -3.9706                  | 0.0618   | 0.56165  |
| C    | -4.29622                 | 0.97594  | 1.60997  |
| C    | -5.47298                 | 0.73204  | 2.35399  |
| C    | -6.2713                  | -0.36597 | 2.11122  |
| C    | -2.8054                  | 0.33863  | -0.22964 |
| C    | -3.39937                 | 2.08387  | 1.91999  |
| C    | -2.19448                 | 2.26267  | 1.17389  |
| C    | -1.96122                 | 1.38939  | 0.05837  |
| C    | -1.27727                 | 3.26345  | 1.57026  |
| H    | -0.33961                 | 3.35979  | 1.04655  |
| C    | -1.55104                 | 4.10062  | 2.6289   |
| C    | -2.75681                 | 3.96572  | 3.33292  |
| C    | -3.65131                 | 2.97443  | 2.98828  |
| H    | -6.52783                 | -2.16602 | 0.93887  |
| H    | -4.51705                 | -1.79142 | -0.40413 |
| H    | -5.76254                 | 1.40955  | 3.14659  |
| H    | -7.16579                 | -0.52308 | 2.70549  |
| H    | -0.82996                 | 4.85776  | 2.91855  |
| H    | -2.98081                 | 4.62849  | 4.1627   |
| H    | -4.55861                 | 2.87884  | 3.57026  |
| C    | -0.0718                  | 2.66714  | -1.24619 |
| C    | -0.80201                 | 3.72435  | -1.8042  |
| C    | 1.28673                  | 2.85608  | -0.97599 |
| C    | -0.19501                 | 4.94383  | -2.0791  |
| H    | -1.85657                 | 3.59059  | -2.01553 |
| C    | 1.89247                  | 4.08344  | -1.24624 |
| H    | 1.86655                  | 2.07191  | -0.50405 |
| C    | 1.15745                  | 5.12899  | -1.79756 |
| H    | -0.77907                 | 5.75065  | -2.50984 |
| H    | 2.94146                  | 4.22612  | -1.01338 |

|   |          |          |          |
|---|----------|----------|----------|
| H | 1.63393  | 6.08209  | -2.00355 |
| C | -3.14916 | -1.25503 | -2.30463 |
| C | -4.16652 | -0.60508 | -3.01528 |
| C | -3.01806 | -2.64011 | -2.43767 |
| C | -5.03053 | -1.32162 | -3.83504 |
| H | -4.28254 | 0.46828  | -2.92184 |
| C | -3.88414 | -3.35851 | -3.2608  |
| H | -2.2777  | -3.17351 | -1.85563 |
| C | -4.89171 | -2.70328 | -3.96272 |
| H | -5.81318 | -0.80014 | -4.37654 |
| H | -3.77311 | -4.435   | -3.34348 |
| H | -5.56673 | -3.26352 | -4.60174 |
| C | 0.66438  | -2.22131 | 2.18866  |
| C | 0.07447  | -3.4529  | 2.53116  |
| C | 1.78363  | -1.83224 | 2.97038  |
| C | 0.58334  | -4.27156 | 3.53288  |
| H | -0.82644 | -3.75948 | 2.02993  |
| C | 2.26533  | -2.64862 | 3.98944  |
| C | 1.66536  | -3.86014 | 4.2991   |
| H | 0.08868  | -5.21534 | 3.73557  |
| H | 3.15404  | -2.30463 | 4.50575  |
| H | 2.05234  | -4.47558 | 5.10381  |
| O | 2.59767  | -0.7564  | 2.67342  |
| C | 3.26824  | -0.74213 | 1.46493  |
| C | 3.19379  | -1.7708  | 0.52965  |
| C | 4.00368  | 0.41159  | 1.20552  |
| C | 3.83762  | -1.63915 | -0.70575 |
| H | 2.63793  | -2.66412 | 0.76539  |
| C | 4.67865  | 0.55468  | -0.00541 |
| H | 3.99705  | 1.18258  | 1.96293  |
| C | 4.57393  | -0.47876 | -0.94863 |
| H | 5.08101  | -0.37237 | -1.89895 |
| H | 0.9518   | 0.07722  | -1.26189 |
| H | -0.50555 | -1.75462 | -1.70799 |
| C | 3.71698  | -2.71519 | -1.79796 |
| C | 5.12194  | -3.19721 | -2.2182  |
| H | 5.04717  | -3.96959 | -2.98976 |
| H | 5.72946  | -2.38538 | -2.62356 |
| H | 5.65912  | -3.62035 | -1.36529 |
| C | 2.99438  | -2.10546 | -3.02005 |
| H | 3.53332  | -1.24662 | -3.4254  |
| H | 2.89351  | -2.84601 | -3.81925 |
| H | 1.98937  | -1.76638 | -2.74952 |
| C | 2.91187  | -3.94125 | -1.33166 |
| H | 3.37233  | -4.42956 | -0.4688  |
| H | 1.88303  | -3.68242 | -1.06427 |
| H | 2.86025  | -4.67852 | -2.13697 |
| C | 5.54824  | 1.78364  | -0.31411 |
| C | 5.30081  | 2.93163  | 0.68072  |

|   |         |         |          |
|---|---------|---------|----------|
| H | 4.24984 | 3.23093 | 0.70437  |
| H | 5.59513 | 2.66204 | 1.69793  |
| H | 5.8927  | 3.80549 | 0.39589  |
| C | 7.03264 | 1.36557 | -0.22102 |
| H | 7.26405 | 0.56434 | -0.92738 |
| H | 7.68696 | 2.21409 | -0.44546 |
| H | 7.27496 | 1.00516 | 0.78229  |
| C | 5.26128 | 2.30586 | -1.73923 |
| H | 5.81022 | 3.23463 | -1.92025 |
| H | 5.57268 | 1.59711 | -2.50916 |
| H | 4.19827 | 2.505   | -1.88663 |

---

## C/PD

B3LYP/6-311+G(d,p), C1

| Atom | Cartesian (Hartree/Bohr) |          |          |
|------|--------------------------|----------|----------|
|      | X                        | Y        | Z        |
| C    | -3.12738                 | 0.1041   | -1.61058 |
| C    | -2.30909                 | 1.41834  | -1.52433 |
| C    | -0.93314                 | 1.06878  | -2.08453 |
| C    | -2.18195                 | -0.91806 | -2.22794 |
| N    | -0.96423                 | -0.27316 | -2.49207 |
| O    | 0.00875                  | 1.80803  | -2.22379 |
| O    | -2.42446                 | -2.06678 | -2.49958 |
| C    | -3.62538                 | -0.16836 | -0.14787 |
| C    | -2.39959                 | 1.8701   | -0.02015 |
| C    | -3.84628                 | 1.33187  | 0.24038  |
| O    | -4.82359                 | 1.89329  | 0.6234   |
| C    | -2.1333                  | -3.94535 | 1.91091  |
| C    | -2.56869                 | -2.82902 | 1.23082  |
| C    | -1.95434                 | -1.56865 | 1.41958  |
| C    | -0.83863                 | -1.46442 | 2.3041   |
| C    | -0.43023                 | -2.62912 | 2.99319  |
| C    | -1.06222                 | -3.84134 | 2.81003  |
| C    | -2.39261                 | -0.37709 | 0.74415  |
| C    | -0.12879                 | -0.1985  | 2.44033  |
| C    | -0.51348                 | 0.92804  | 1.65148  |
| C    | -1.69225                 | 0.80818  | 0.8355   |
| C    | 0.26318                  | 2.10872  | 1.71649  |
| H    | 0.00462                  | 2.9496   | 1.09156  |
| C    | 1.34501                  | 2.20719  | 2.56403  |
| C    | 1.69242                  | 1.12343  | 3.3827   |
| C    | 0.9734                   | -0.05083 | 3.31222  |
| H    | -2.6171                  | -4.90208 | 1.74419  |
| H    | -3.38637                 | -2.92168 | 0.5321   |
| H    | 0.40916                  | -2.58735 | 3.67518  |
| H    | -0.71807                 | -4.71617 | 3.35251  |
| H    | 1.9214                   | 3.12581  | 2.59919  |
| H    | 2.5337                   | 1.20109  | 4.06375  |
| H    | 1.27414                  | -0.87412 | 3.94704  |
| C    | -2.22472                 | 3.34356  | 0.26064  |
| C    | -2.71693                 | 3.87965  | 1.45887  |
| C    | -1.5991                  | 4.2057   | -0.64714 |
| C    | -2.58787                 | 5.23579  | 1.73881  |
| H    | -3.20681                 | 3.23479  | 2.17824  |
| C    | -1.47048                 | 5.56516  | -0.3651  |
| H    | -1.16261                 | 3.81173  | -1.55681 |
| C    | -1.96588                 | 6.08624  | 0.82628  |
| H    | -2.97832                 | 5.62951  | 2.67182  |
| H    | -0.97499                 | 6.21392  | -1.08049 |

|   |          |          |          |
|---|----------|----------|----------|
| H | -1.86708 | 7.14485  | 1.04459  |
| C | -4.85098 | -1.03432 | 0.01966  |
| C | -5.55366 | -0.99427 | 1.23189  |
| C | -5.33018 | -1.86282 | -1.00079 |
| C | -6.69991 | -1.75913 | 1.41732  |
| H | -5.20439 | -0.35858 | 2.03707  |
| C | -6.48033 | -2.62892 | -0.81409 |
| H | -4.77958 | -1.9553  | -1.9287  |
| C | -7.17068 | -2.579   | 0.39298  |
| H | -7.22892 | -1.71112 | 2.36378  |
| H | -6.82942 | -3.27128 | -1.61636 |
| H | -8.06592 | -3.17543 | 0.53728  |
| C | 0.10952  | -0.90139 | -3.1987  |
| C | -0.07209 | -1.27743 | -4.52676 |
| C | 1.33726  | -1.13156 | -2.56328 |
| C | 0.96335  | -1.86818 | -5.24196 |
| H | -1.03327 | -1.09852 | -4.99509 |
| C | 2.38175  | -1.70997 | -3.28836 |
| C | 2.19032  | -2.07519 | -4.61683 |
| H | 0.81372  | -2.15811 | -6.2758  |
| H | 3.33542  | -1.8793  | -2.80482 |
| H | 3.01006  | -2.52972 | -5.1637  |
| O | 1.42476  | -0.80177 | -1.2409  |
| C | 2.69034  | -0.61509 | -0.68156 |
| C | 3.37047  | 0.56923  | -0.93168 |
| C | 3.20365  | -1.60462 | 0.14339  |
| C | 4.62103  | 0.78113  | -0.34505 |
| H | 2.89517  | 1.30313  | -1.56885 |
| C | 4.45336  | -1.42184 | 0.74574  |
| H | 2.61088  | -2.49599 | 0.30008  |
| C | 5.13503  | -0.22807 | 0.48091  |
| H | 6.10434  | -0.07366 | 0.9411   |
| H | -2.73297 | 2.20453  | -2.15419 |
| H | -3.99467 | 0.20284  | -2.26853 |
| C | 5.42755  | 2.07292  | -0.57458 |
| C | 6.78706  | 1.72574  | -1.22177 |
| H | 7.37152  | 2.63506  | -1.39346 |
| H | 7.38525  | 1.06404  | -0.59111 |
| H | 6.64732  | 1.22849  | -2.18549 |
| C | 5.67086  | 2.77849  | 0.77867  |
| H | 6.23472  | 2.15146  | 1.47325  |
| H | 6.23991  | 3.70165  | 0.63113  |
| H | 4.72426  | 3.03853  | 1.25979  |
| C | 4.69489  | 3.05888  | -1.50149 |
| H | 4.52066  | 2.63631  | -2.49457 |
| H | 3.72941  | 3.36699  | -1.09234 |
| H | 5.29852  | 3.96113  | -1.63222 |
| C | 5.07916  | -2.47669 | 1.6772   |
| C | 4.20407  | -3.73659 | 1.80199  |

|   |         |          |         |
|---|---------|----------|---------|
| H | 3.21832 | -3.51349 | 2.21825 |
| H | 4.05877 | -4.2314  | 0.83779 |
| H | 4.68538 | -4.45695 | 2.46907 |
| C | 6.45852 | -2.90588 | 1.12903 |
| H | 7.15555 | -2.06713 | 1.06816 |
| H | 6.90964 | -3.66197 | 1.77904 |
| H | 6.36767 | -3.3346  | 0.12726 |
| C | 5.25589 | -1.87221 | 3.08854 |
| H | 5.69377 | -2.60866 | 3.76967 |
| H | 5.91181 | -0.99867 | 3.07945 |
| H | 4.29363 | -1.55834 | 3.50209 |

---

## C/PD

B3LYP+D3/6-311+G(d,p), C1

| Atom | Cartesian (Hartree/Bohr) |          |          |
|------|--------------------------|----------|----------|
|      | X                        | Y        | Z        |
| C    | 3.28261                  | 0.03384  | 1.49163  |
| C    | 2.48356                  | 1.36162  | 1.53621  |
| C    | 1.13352                  | 0.98547  | 2.13176  |
| C    | 2.39838                  | -0.99298 | 2.17274  |
| N    | 1.19102                  | -0.36405 | 2.49638  |
| O    | 0.18031                  | 1.70464  | 2.29673  |
| O    | 2.66065                  | -2.14326 | 2.41623  |
| C    | 3.52851                  | -0.22283 | -0.0318  |
| C    | 2.42597                  | 1.87229  | 0.05365  |
| C    | 3.78857                  | 1.27045  | -0.42443 |
| O    | 4.73161                  | 1.78136  | -0.93853 |
| C    | 1.43814                  | -3.9001  | -1.67846 |
| C    | 2.07008                  | -2.80885 | -1.12463 |
| C    | 1.53491                  | -1.50874 | -1.26652 |
| C    | 0.30262                  | -1.32944 | -1.96159 |
| C    | -0.30036                 | -2.46807 | -2.53698 |
| C    | 0.25118                  | -3.72515 | -2.40498 |
| C    | 2.16146                  | -0.34587 | -0.713   |
| C    | -0.32442                 | -0.01782 | -2.01683 |
| C    | 0.26071                  | 1.08617  | -1.32757 |
| C    | 1.53739                  | 0.88172  | -0.70845 |
| C    | -0.42545                 | 2.32137  | -1.29815 |
| H    | -0.01051                 | 3.14938  | -0.74725 |
| C    | -1.61969                 | 2.48573  | -1.96178 |
| C    | -2.18158                 | 1.41578  | -2.67117 |
| C    | -1.547                   | 0.19431  | -2.68933 |
| H    | 1.86014                  | -4.89092 | -1.55023 |
| H    | 2.97926                  | -2.95045 | -0.56064 |
| H    | -1.22344                 | -2.36655 | -3.08861 |
| H    | -0.24298                 | -4.57944 | -2.8562  |
| H    | -2.12279                 | 3.44568  | -1.92989 |
| H    | -3.12611                 | 1.53848  | -3.18909 |
| H    | -2.01605                 | -0.61884 | -3.22456 |
| C    | 2.26478                  | 3.3495   | -0.15435 |
| C    | 2.61123                  | 3.90494  | -1.39113 |
| C    | 1.74856                  | 4.18572  | 0.83883  |
| C    | 2.44243                  | 5.26378  | -1.62894 |
| H    | 3.00792                  | 3.26933  | -2.17251 |
| C    | 1.57865                  | 5.5475   | 0.59904  |
| H    | 1.41788                  | 3.76713  | 1.78071  |
| C    | 1.92527                  | 6.09144  | -0.63407 |
| H    | 2.71468                  | 5.67746  | -2.59419 |
| H    | 1.1648                   | 6.17998  | 1.3774   |

|   |          |          |          |
|---|----------|----------|----------|
| H | 1.79128  | 7.15172  | -0.82109 |
| C | 4.62556  | -1.16953 | -0.4215  |
| C | 5.03095  | -1.20134 | -1.76062 |
| C | 5.25426  | -2.01641 | 0.49306  |
| C | 6.0373   | -2.06321 | -2.17687 |
| H | 4.54752  | -0.55172 | -2.48102 |
| C | 6.26421  | -2.88119 | 0.07481  |
| H | 4.92063  | -2.04963 | 1.52184  |
| C | 6.6593   | -2.90772 | -1.25858 |
| H | 6.33703  | -2.07653 | -3.21943 |
| H | 6.73447  | -3.54148 | 0.79594  |
| H | 7.4437   | -3.5835  | -1.58292 |
| C | 0.10997  | -1.04521 | 3.12647  |
| C | 0.22377  | -1.45877 | 4.4484   |
| C | -1.06487 | -1.28109 | 2.4072   |
| C | -0.84272 | -2.08963 | 5.07815  |
| H | 1.15182  | -1.27333 | 4.97632  |
| C | -2.14435 | -1.89147 | 3.04671  |
| C | -2.02644 | -2.29289 | 4.37318  |
| H | -0.75269 | -2.41087 | 6.10924  |
| H | -3.0648  | -2.05339 | 2.50146  |
| H | -2.8707  | -2.77286 | 4.85651  |
| O | -1.07253 | -0.91386 | 1.08997  |
| C | -2.31829 | -0.63421 | 0.52797  |
| C | -2.86477 | 0.62476  | 0.73771  |
| C | -2.96296 | -1.60907 | -0.20832 |
| C | -4.11466 | 0.9222   | 0.20391  |
| H | -2.28915 | 1.33614  | 1.3129   |
| C | -4.22854 | -1.33974 | -0.7483  |
| H | -2.47027 | -2.5642  | -0.34052 |
| C | -4.77588 | -0.07653 | -0.52802 |
| H | -5.75503 | 0.14563  | -0.92781 |
| H | 2.95754  | 2.1107   | 2.17299  |
| H | 4.24029  | 0.09425  | 2.01152  |
| C | -4.80015 | 2.27318  | 0.44482  |
| C | -6.01801 | 2.04684  | 1.36501  |
| H | -6.5273  | 2.99364  | 1.56903  |
| H | -6.7429  | 1.36659  | 0.91172  |
| H | -5.70786 | 1.61504  | 2.3199   |
| C | -5.28161 | 2.88045  | -0.88751 |
| H | -5.99879 | 2.23598  | -1.39962 |
| H | -5.774   | 3.8404   | -0.70817 |
| H | -4.44416 | 3.05179  | -1.56534 |
| C | -3.86003 | 3.28227  | 1.12215  |
| H | -3.56049 | 2.95527  | 2.12033  |
| H | -2.9525  | 3.44647  | 0.5376   |
| H | -4.36802 | 4.24372  | 1.23255  |
| C | -4.97578 | -2.44179 | -1.51084 |
| C | -4.12243 | -2.92846 | -2.6976  |

|   |          |          |          |
|---|----------|----------|----------|
| H | -3.92291 | -2.11027 | -3.39479 |
| H | -3.16495 | -3.33364 | -2.36741 |
| H | -4.64435 | -3.71759 | -3.24642 |
| C | -5.23283 | -3.62427 | -0.55397 |
| H | -5.83331 | -3.30676 | 0.30245  |
| H | -5.77127 | -4.4259  | -1.06837 |
| H | -4.29983 | -4.04202 | -0.16998 |
| C | -6.32736 | -1.96283 | -2.0597  |
| H | -6.81457 | -2.77669 | -2.60226 |
| H | -7.00565 | -1.65058 | -1.26179 |
| H | -6.21116 | -1.12695 | -2.75463 |

---
